# Supplementary material for: A cascade A3 coupling strategy towards the regioselective synthesis of β-carboline N-fused pyrrole derivatives with pyridine tethers
Source: Royal Society of Chemistry journal article supplement (doi:10.1039/d2nj04620b), 2022-12-01
Supplement: d2nj04620b1.pdf [file d2nj04620b1.pdf]

**A Cascade A<sup>3</sup> Coupling Strategy towards Regioselective Synthesis of  $\beta$ -Carboline *N*-fused  
Pyrrole Derivatives with Pyridine Tethers**

Vaishali,<sup>a</sup> Chandni C. Malakar,<sup>b</sup> and Virender Singh<sup>a,c</sup>

<sup>a</sup> Department of Chemistry, Dr B R Ambedkar National Institute of Technology, Jalandhar, Punjab, India-144027

<sup>b</sup> Department of Chemistry, National Institute of Technology, Manipur, Imphal, India-795004

<sup>c</sup> Department of Chemistry, Central University of Punjab, Bathinda, Punjab, India-151001

Email id: [virender.singh@cup.edu.in](mailto:virender.singh@cup.edu.in)

**Supporting Information**

**Table of Contents**

|                                                                                  |              |
|----------------------------------------------------------------------------------|--------------|
| <b>1. <sup>1</sup>H- and <sup>13</sup>C-NMR Spectrum of the products (S1-64)</b> | <b>2-33</b>  |
| <b>2. HRMS spectrum of the products (S65-89)</b>                                 | <b>34-46</b> |

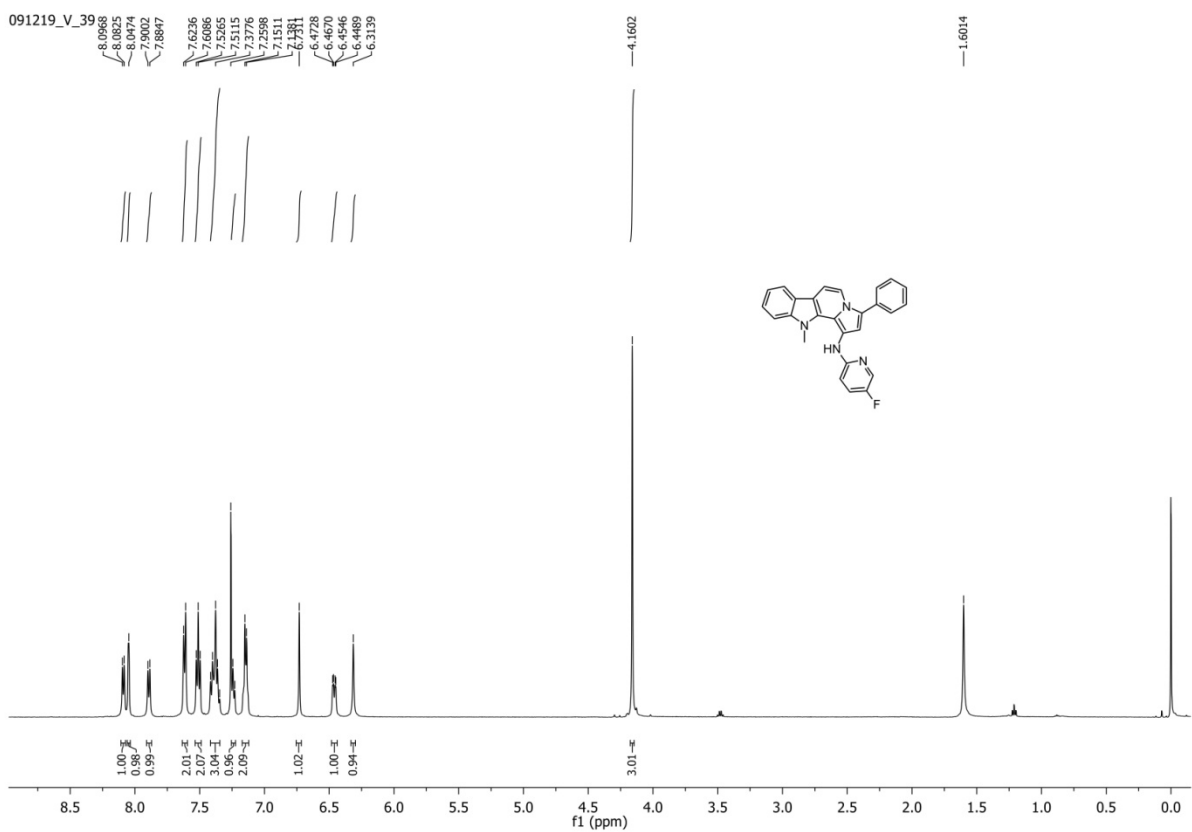

Figure S1.  $^1\text{H-NMR}$  spectrum of **1aB**.

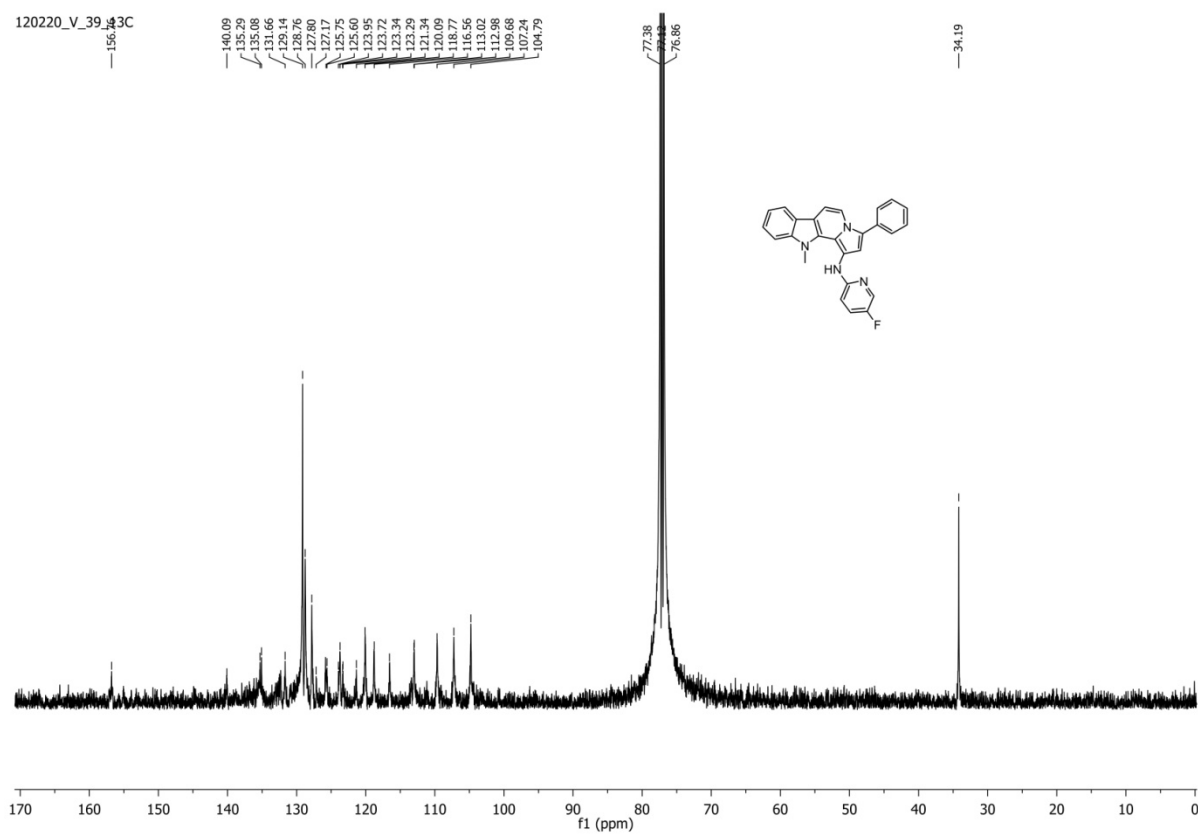

Figure S2.  $^{13}\text{C-NMR}$  spectrum of **1aB** (Solubility issue).

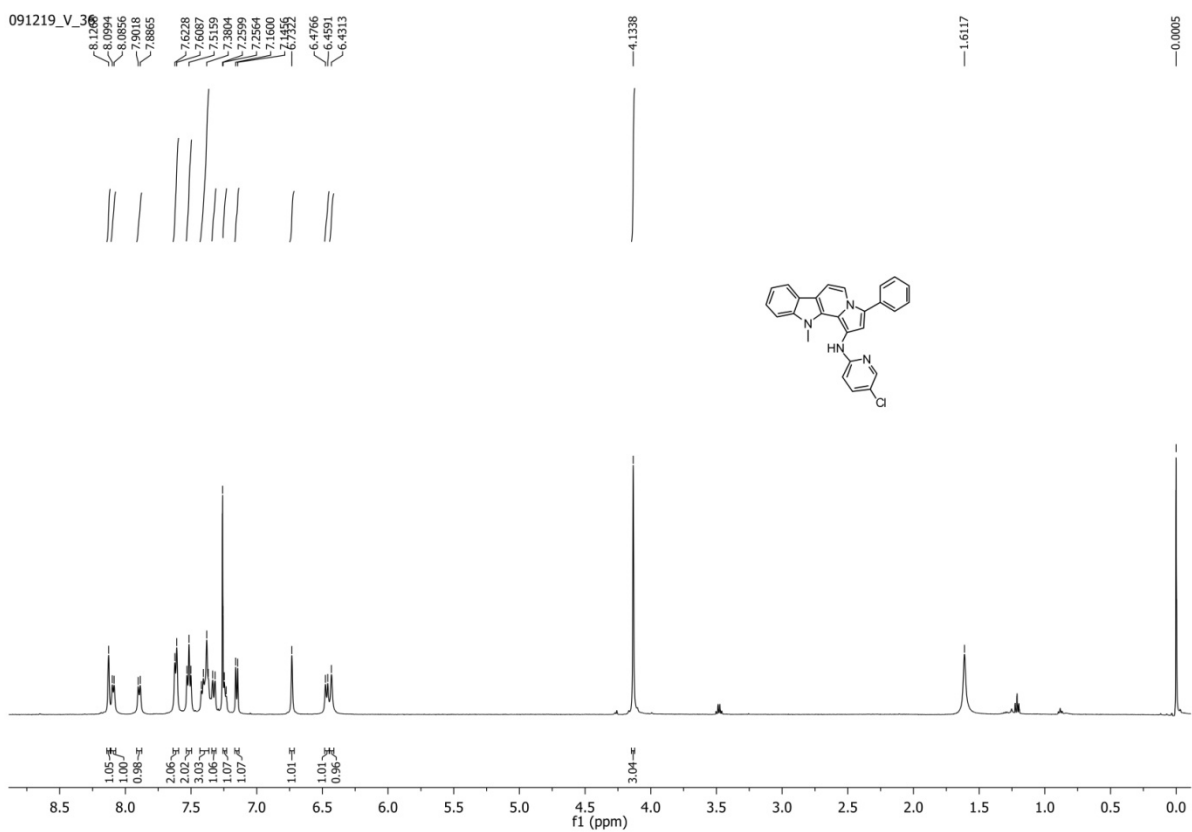

Figure S3.  $^1\text{H-NMR}$  spectrum of **1aC**.

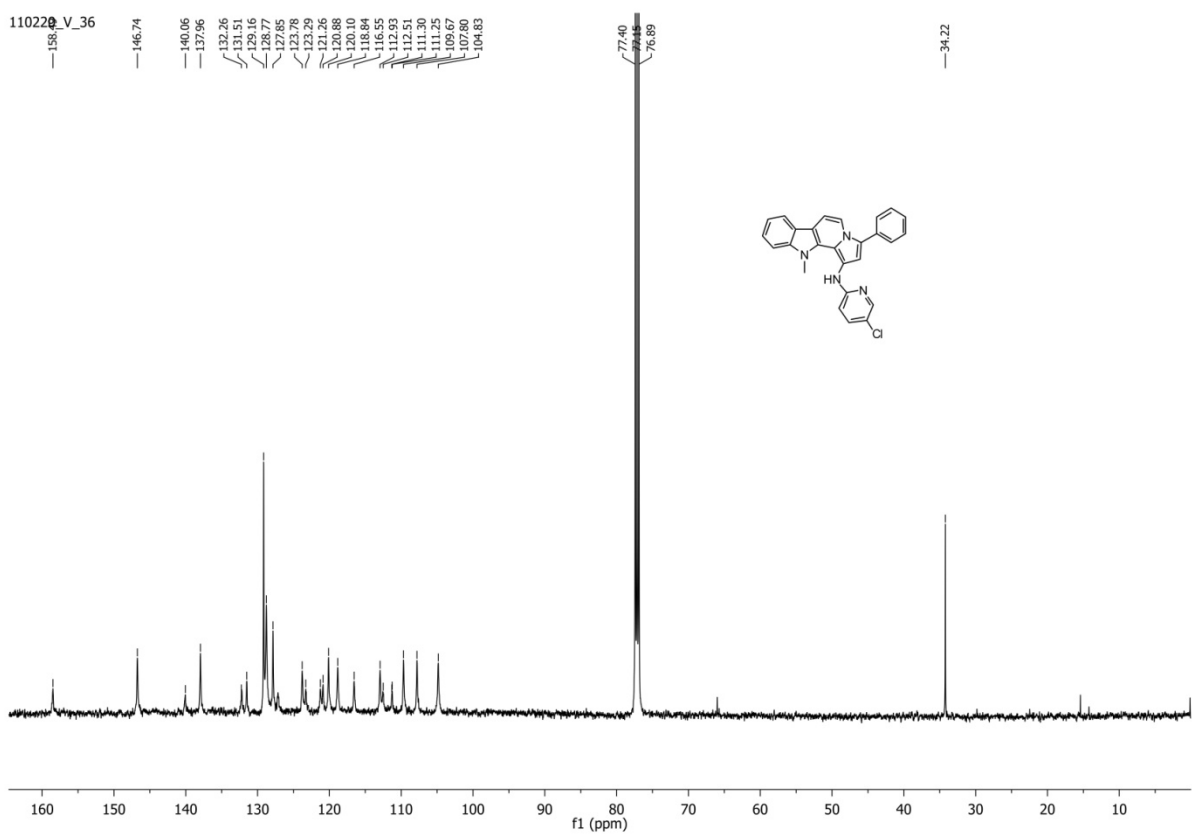

Figure S4.  $^{13}\text{C-NMR}$  spectrum of **1aC**.

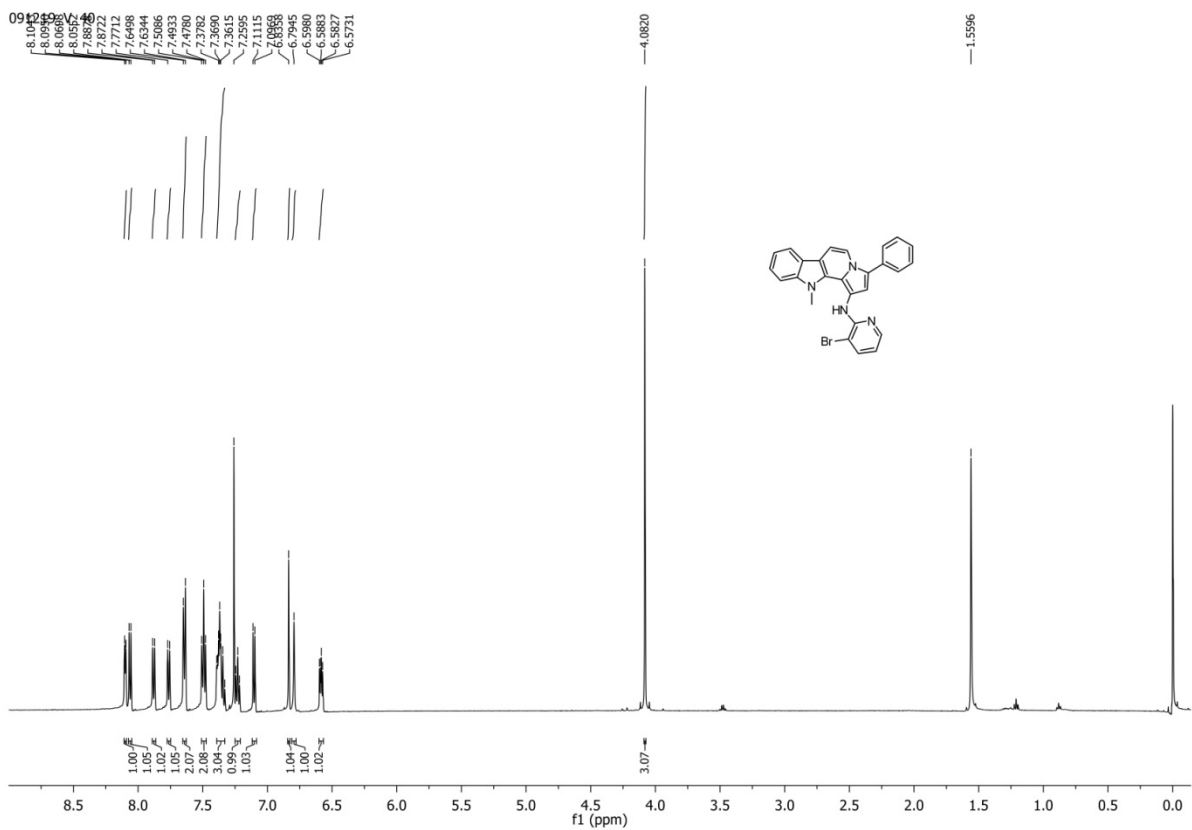

Figure S5.  $^1\text{H-NMR}$  spectrum of 1aD.

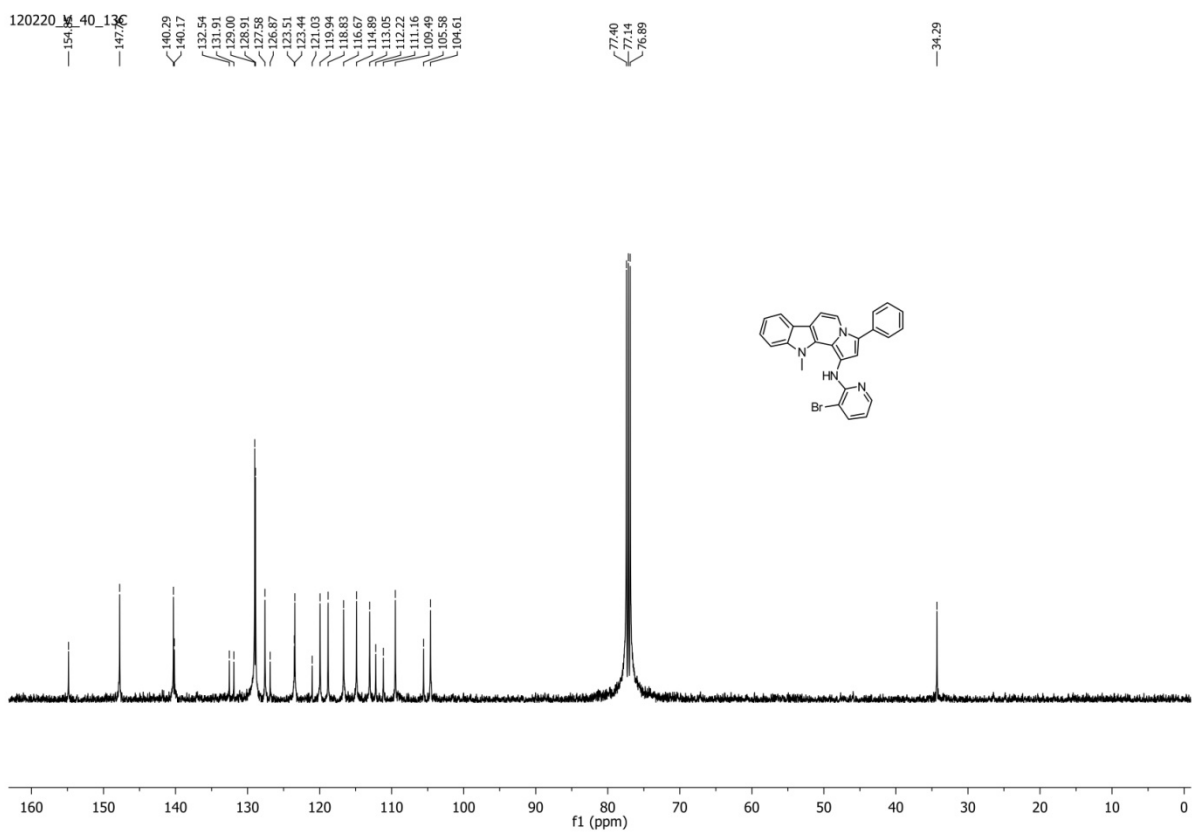

Figure S6.  $^{13}\text{C-NMR}$  spectrum of 1aD.



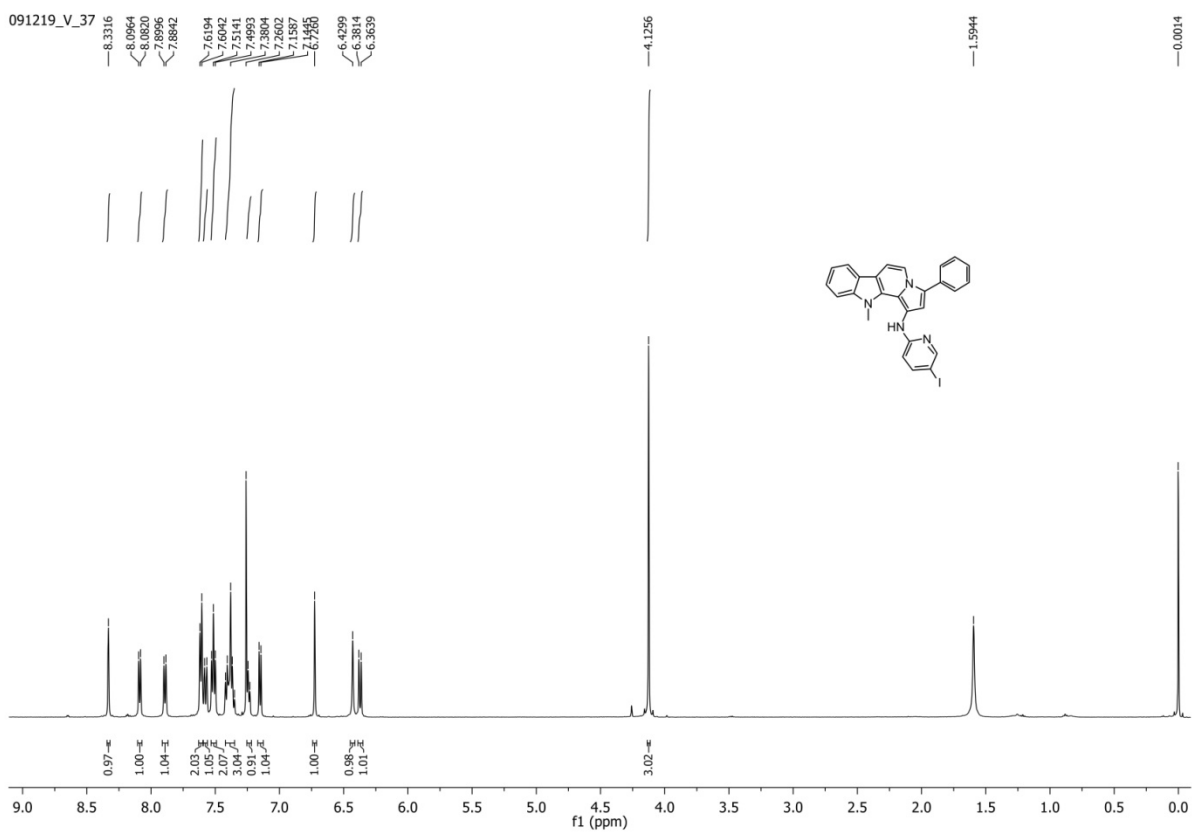

Figure S9.  $^1\text{H-NMR}$  spectrum of **1aF**.

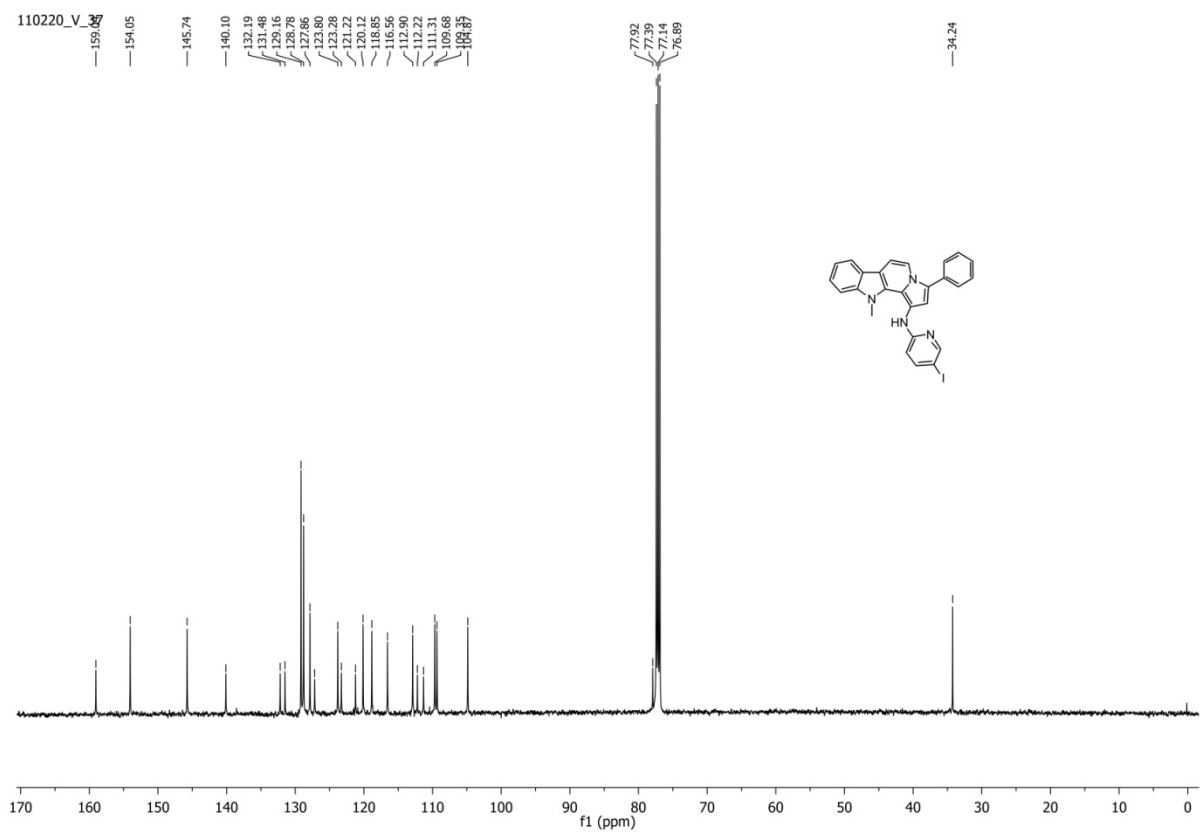

Figure S10.  $^{13}\text{C-NMR}$  spectrum of **1aF**.

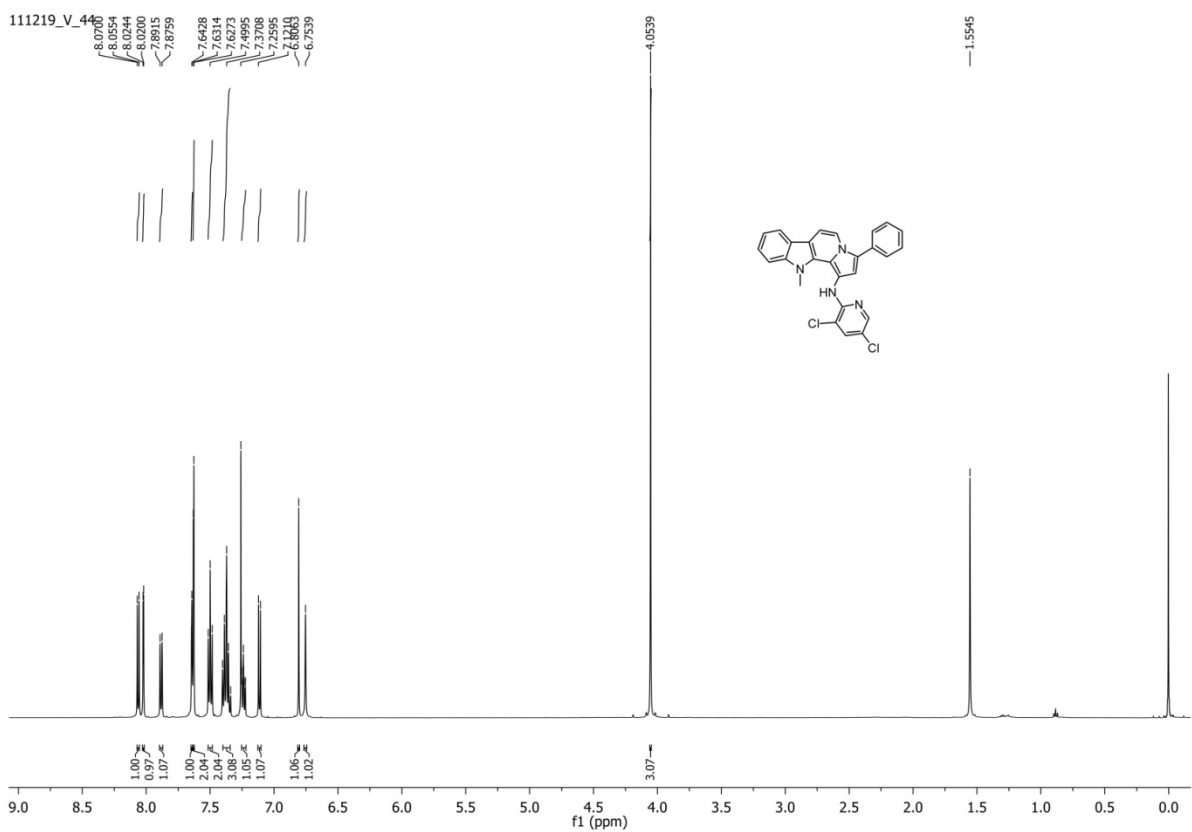

Figure S11.  $^1\text{H-NMR}$  spectrum of **1aG**.

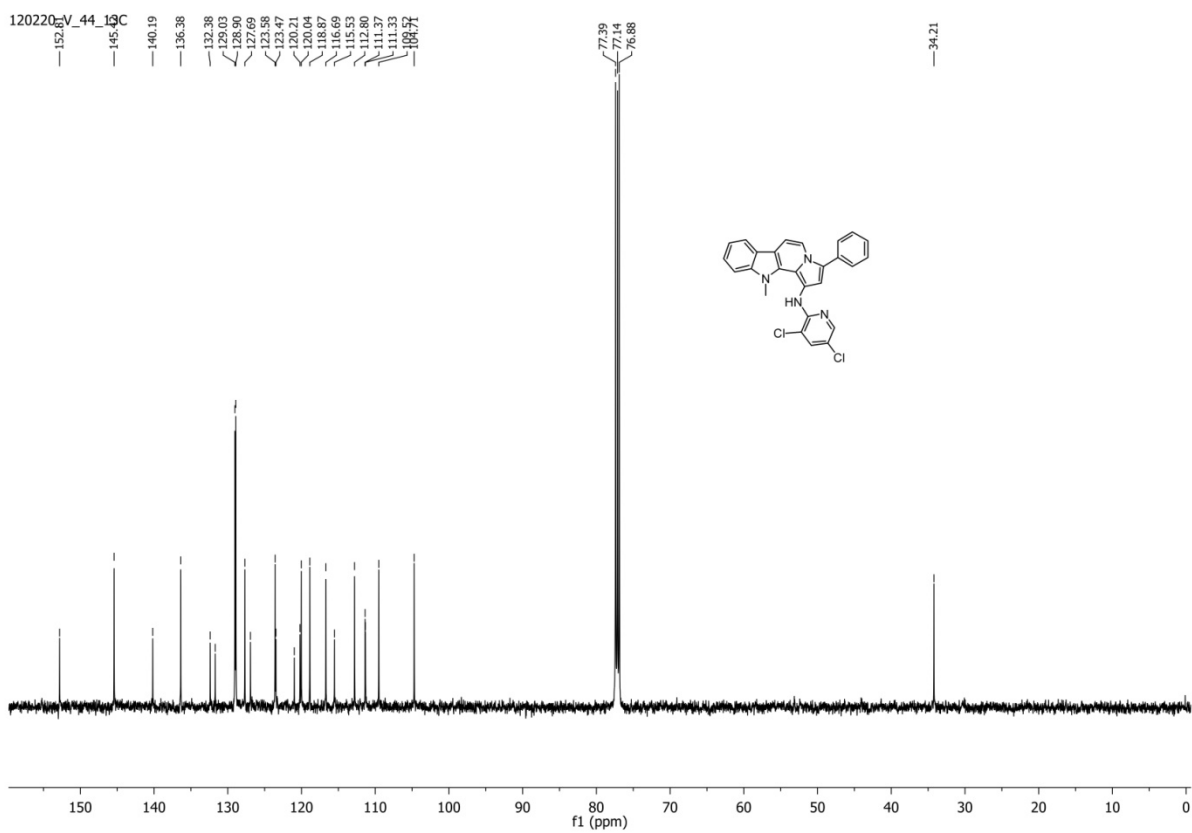

Figure S12.  $^{13}\text{C-NMR}$  spectrum of **1aG**.

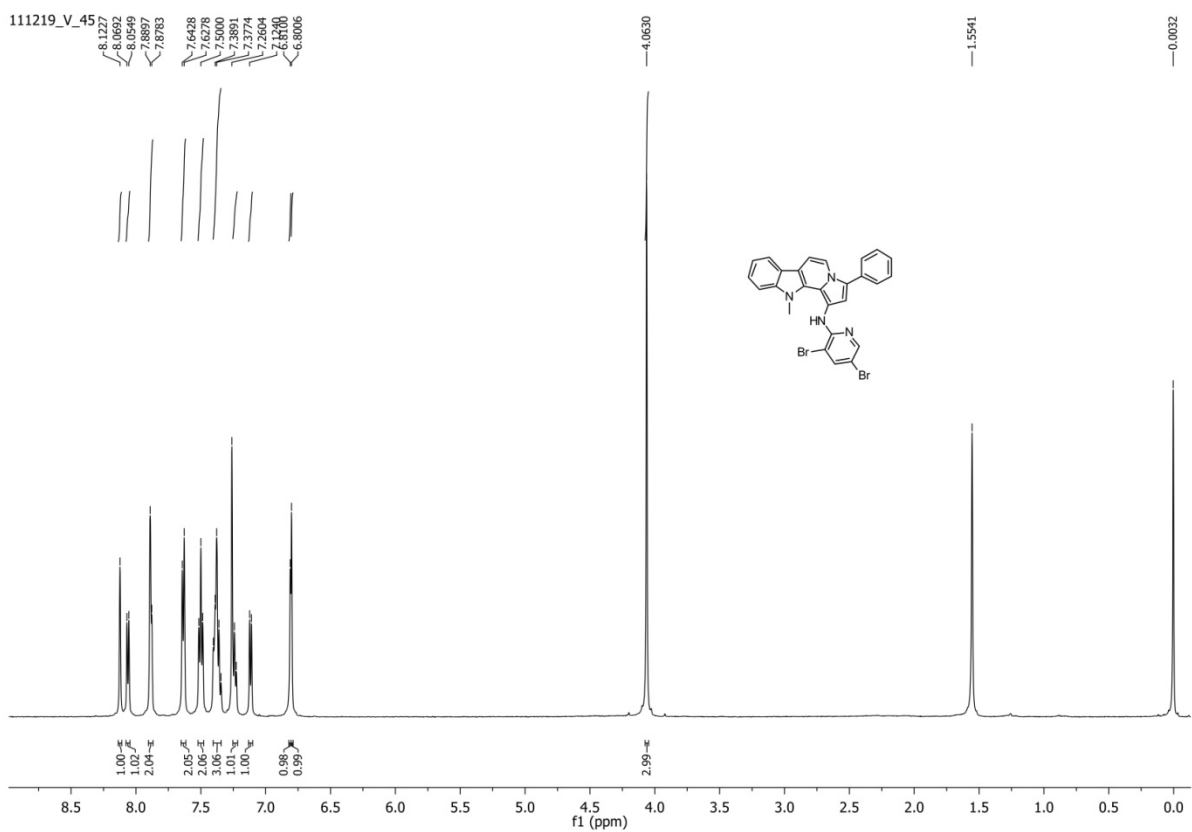

Figure S13.  $^1\text{H-NMR}$  spectrum of **1aH**.

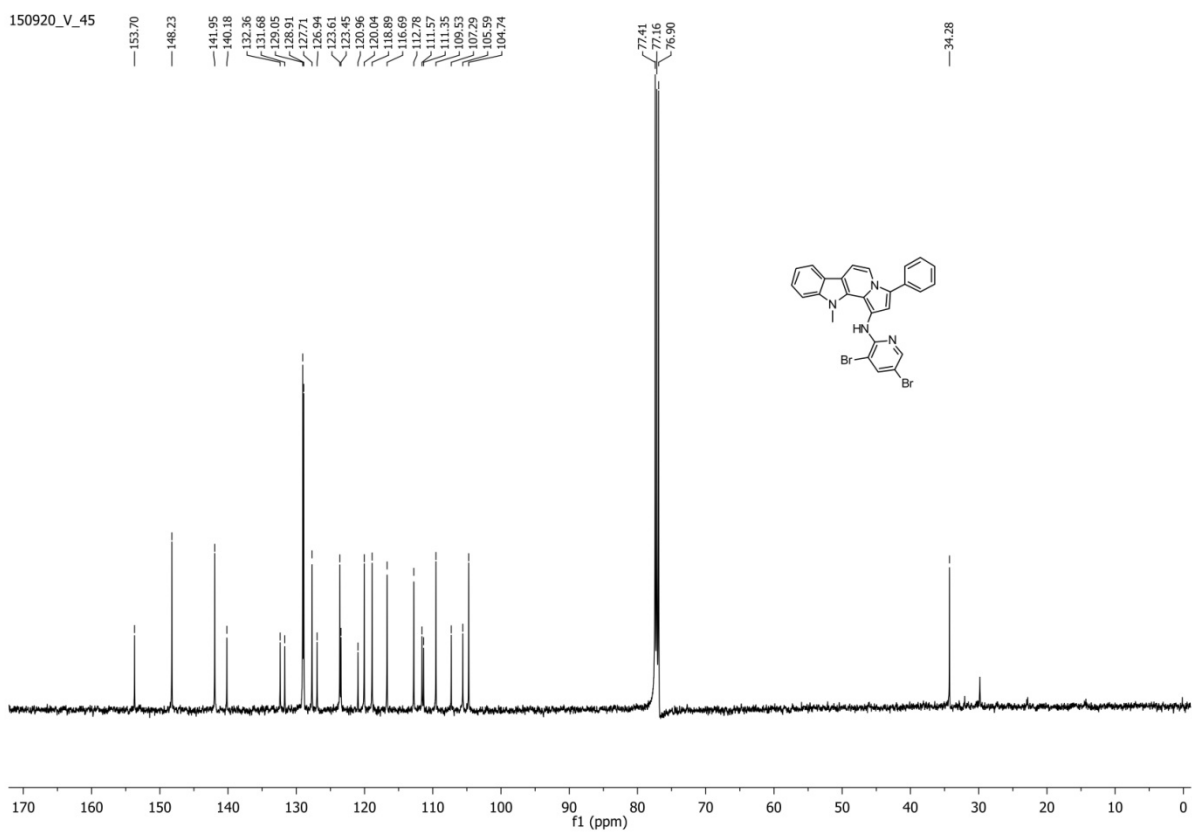

Figure S14.  $^{13}\text{C-NMR}$  spectrum of **1aH**.



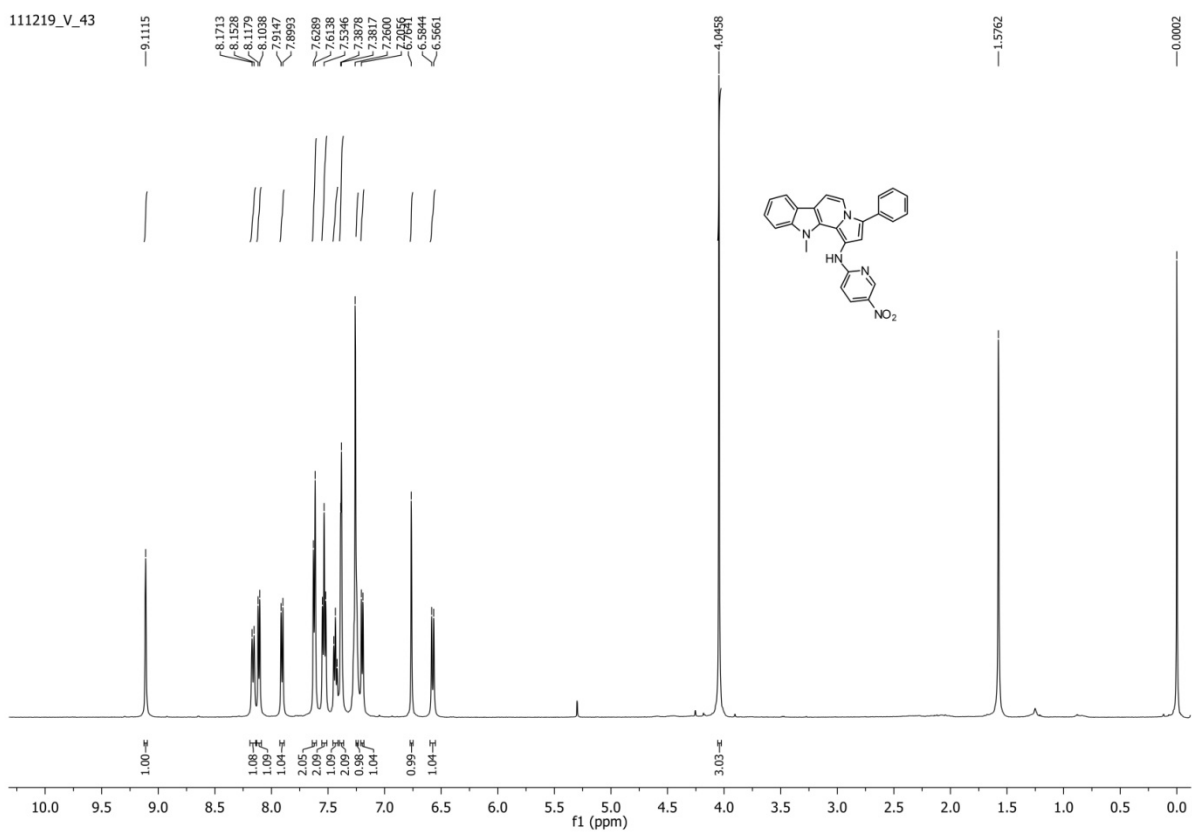

Figure S15.  $^1\text{H-NMR}$  spectrum of **1a**.

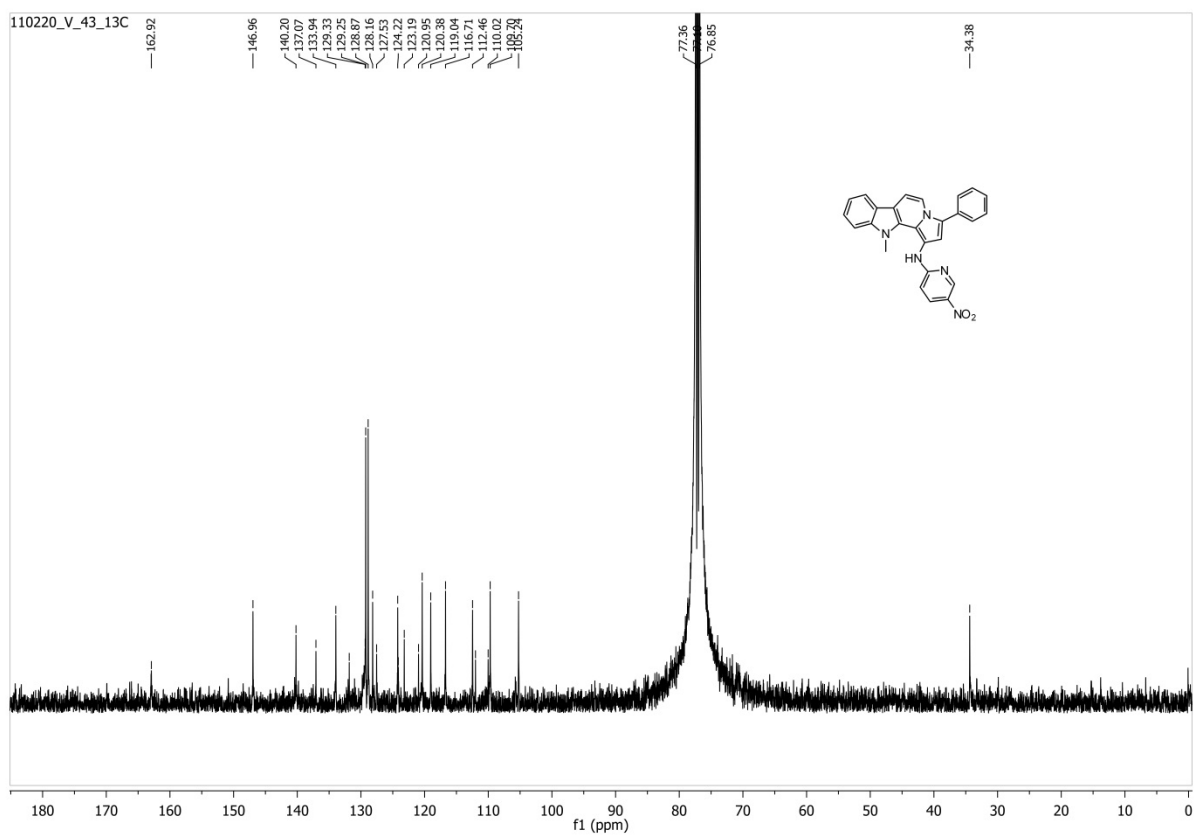

Figure S16.  $^{13}\text{C-NMR}$  spectrum of **1a**.

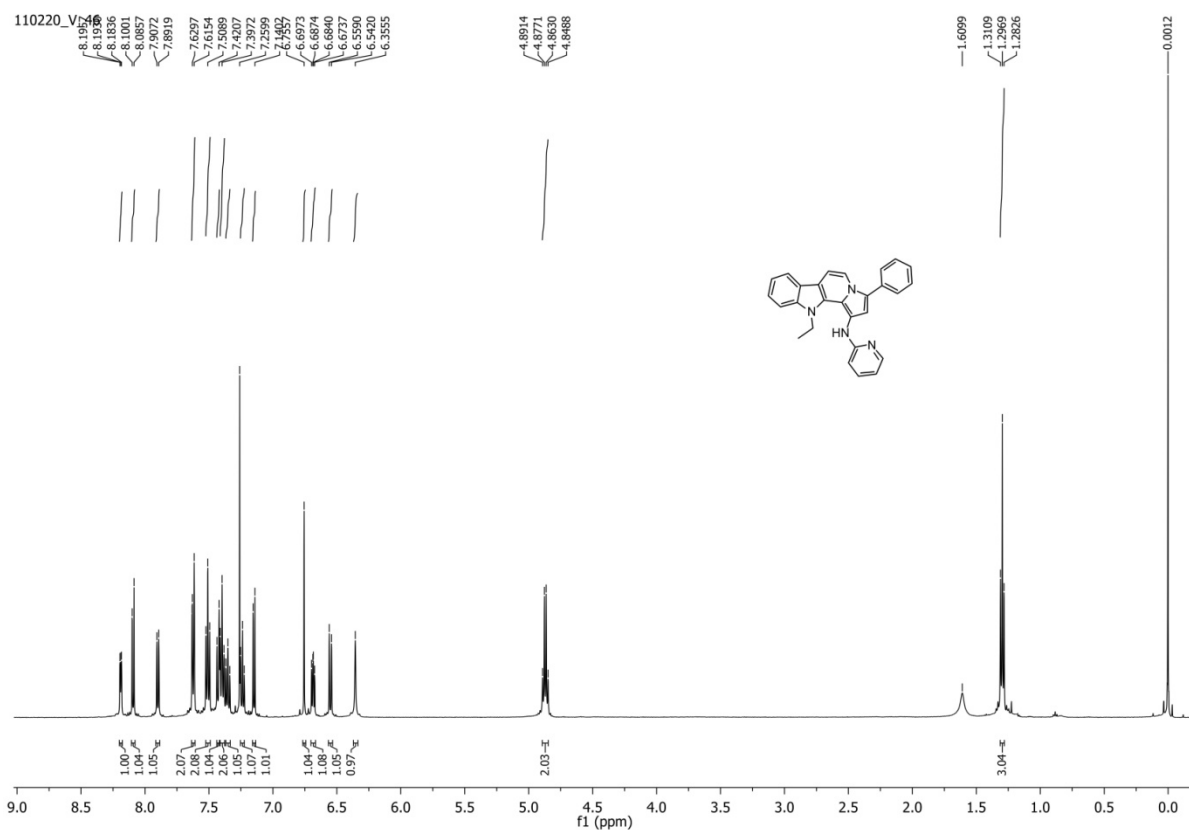

Figure S17.  $^1\text{H-NMR}$  spectrum of **2aA**.

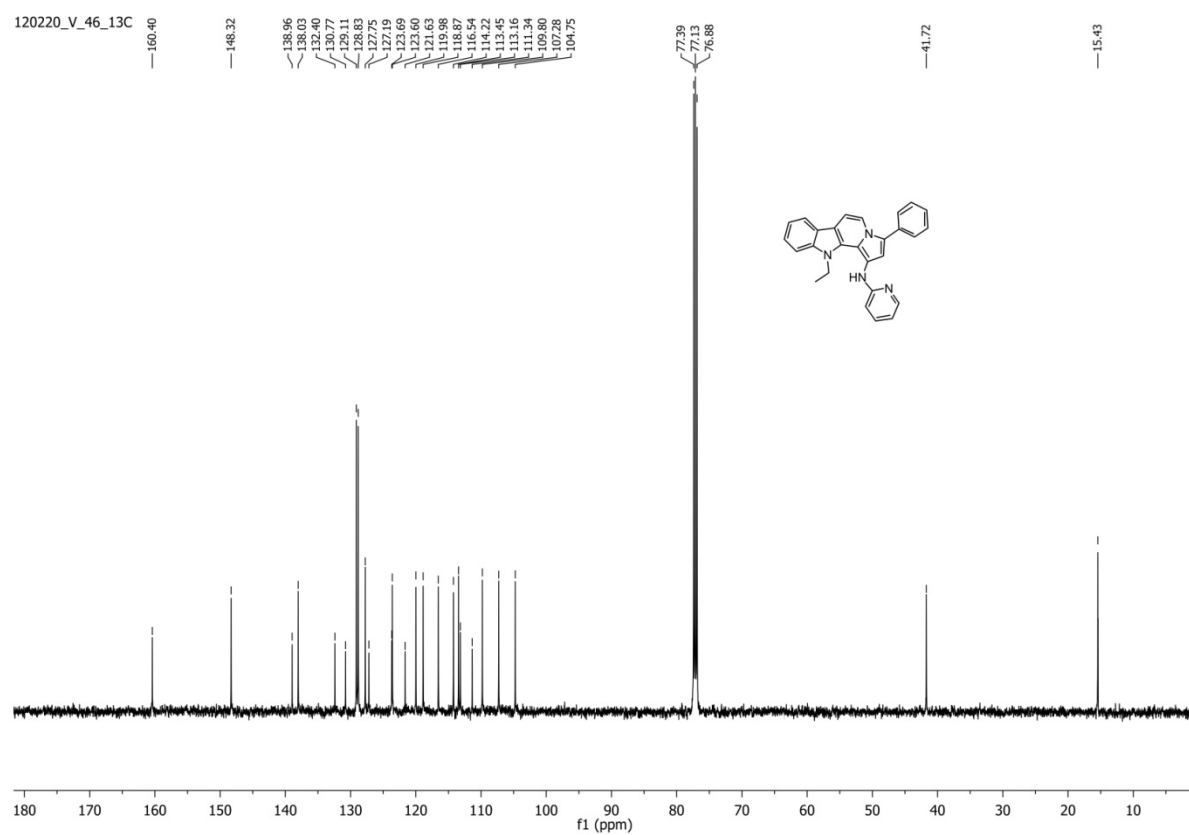

Figure S18.  $^{13}\text{C-NMR}$  spectrum of **2aA**.

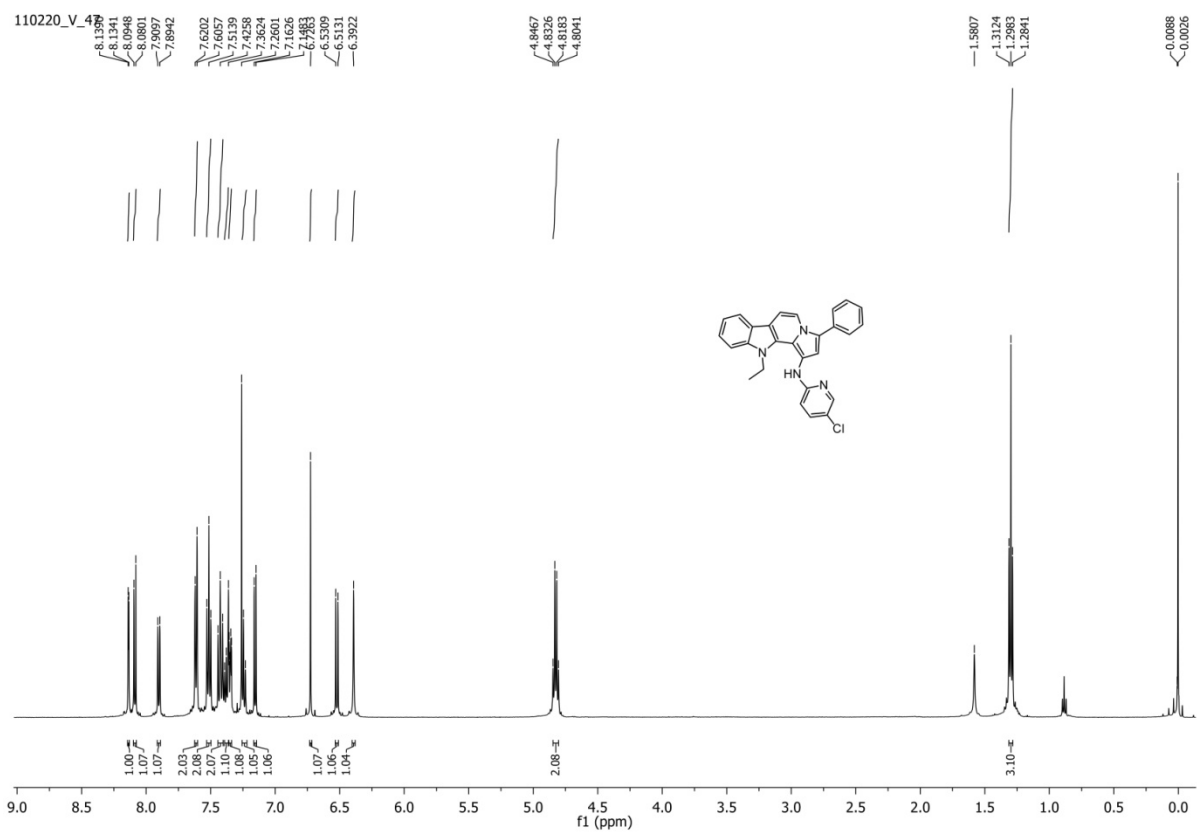

Figure S19.  $^1\text{H-NMR}$  spectrum of 2aC.

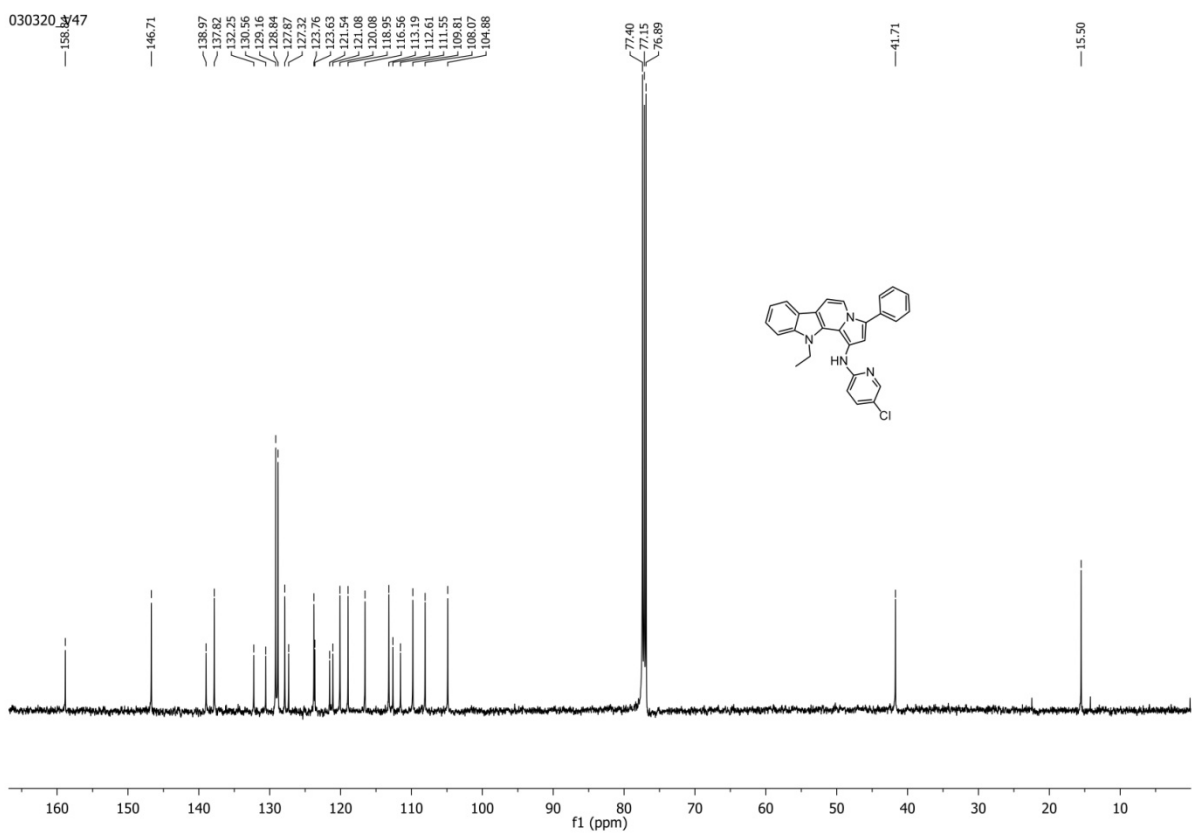

Figure S20.  $^{13}\text{C-NMR}$  spectrum of 2aC.

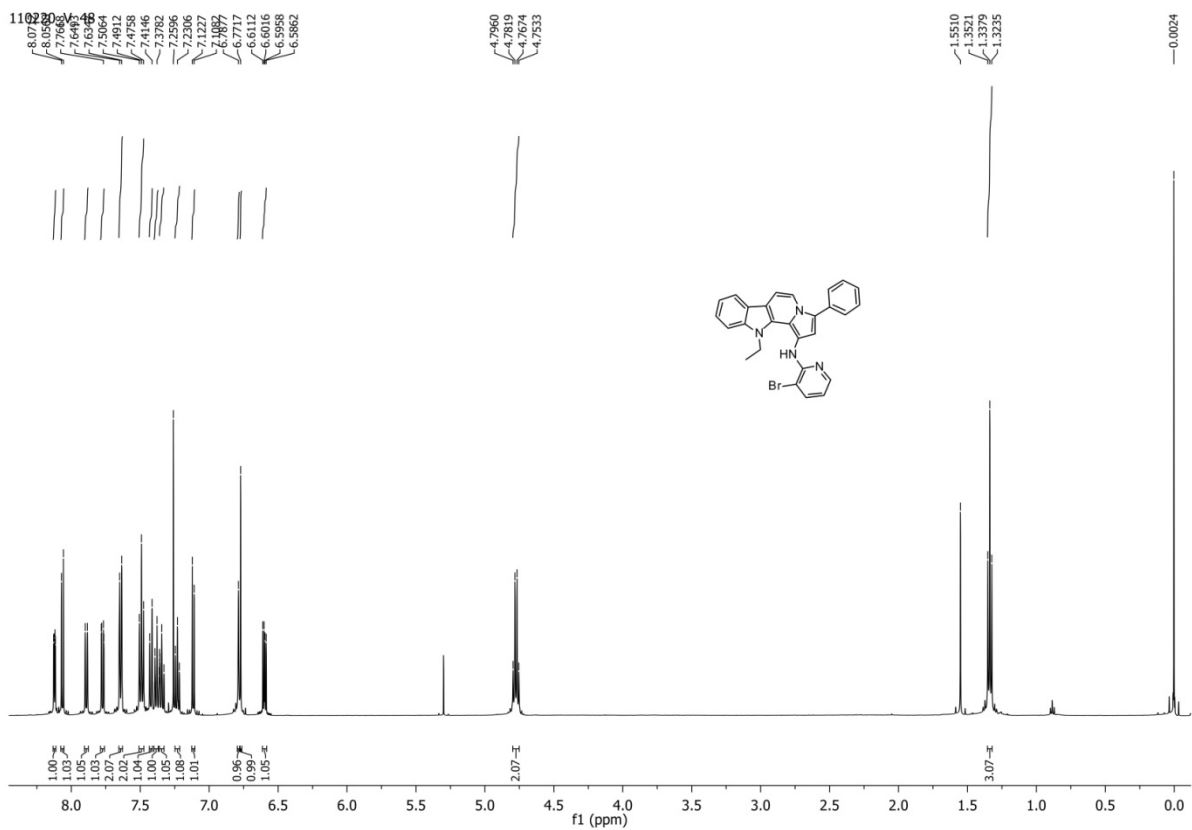

Figure S21. <sup>1</sup>H-NMR spectrum of 2aD.

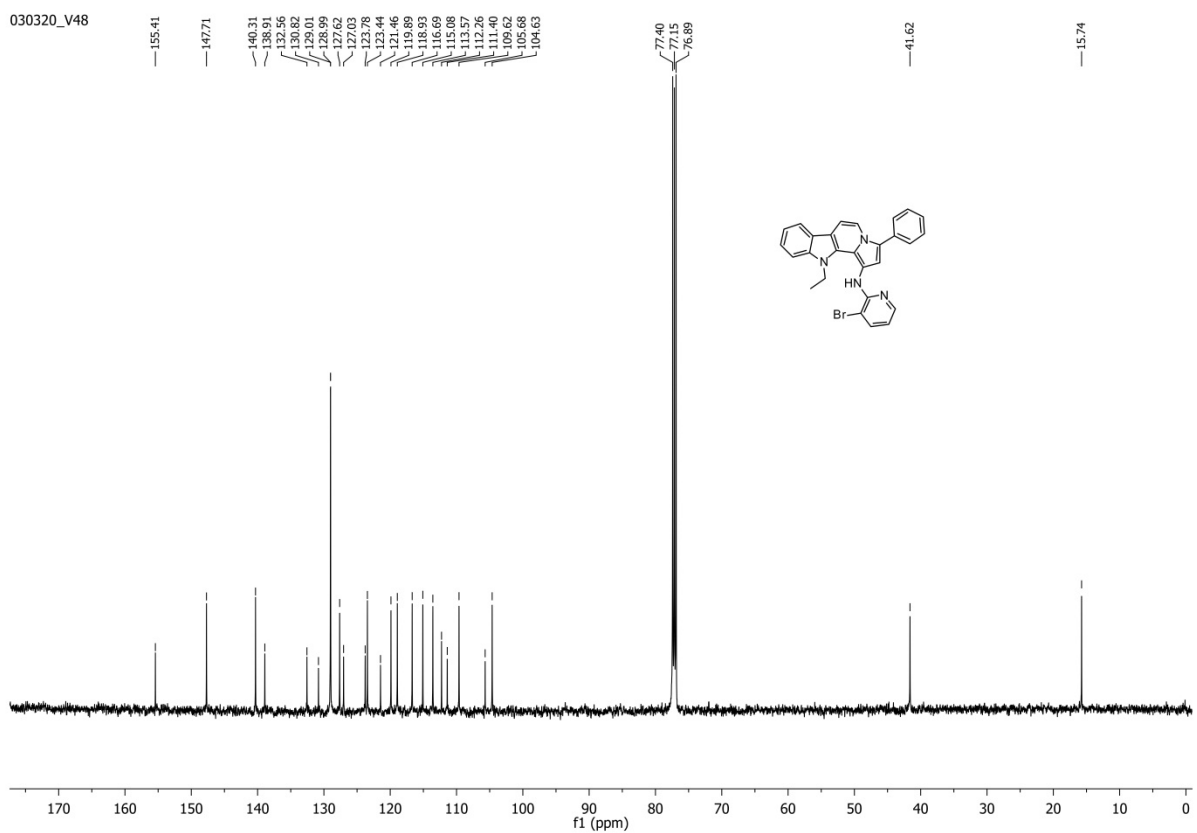

Figure S22. <sup>13</sup>C-NMR spectrum of 2aD.

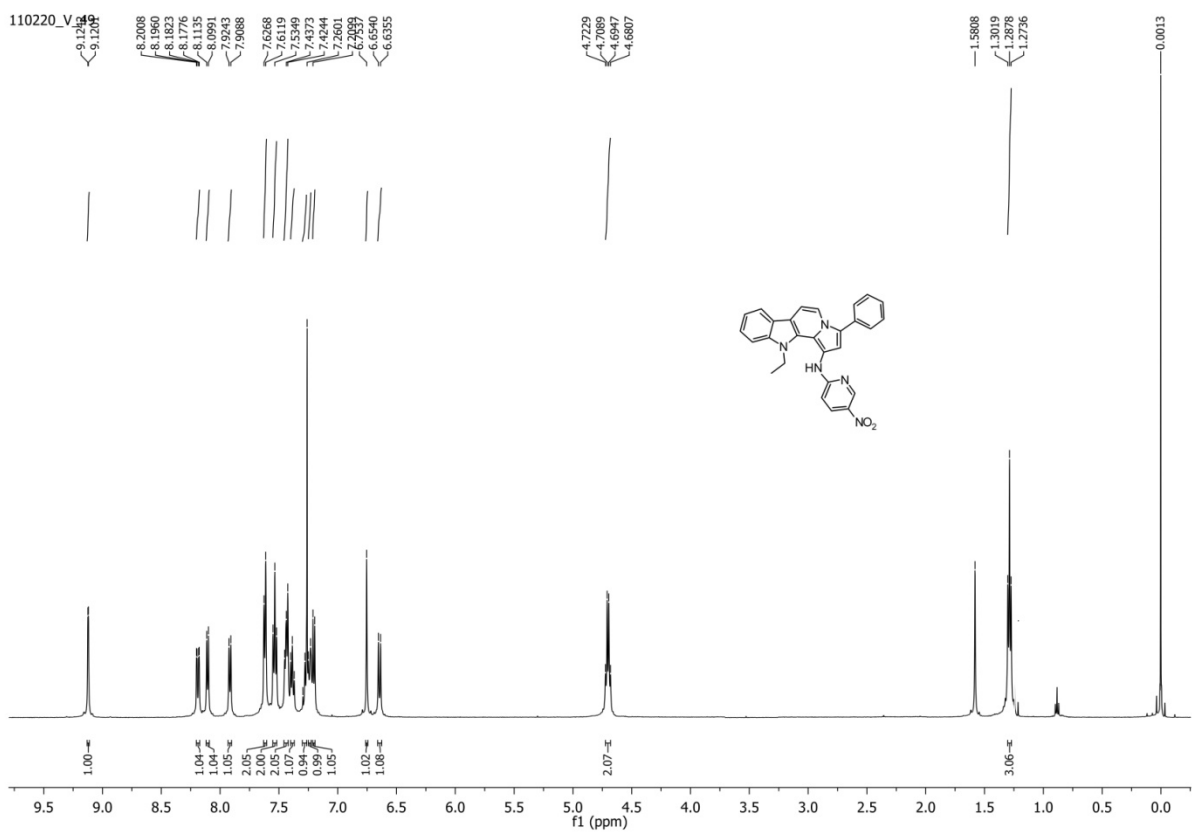

Figure S23. <sup>1</sup>H-NMR spectrum of 2aI.

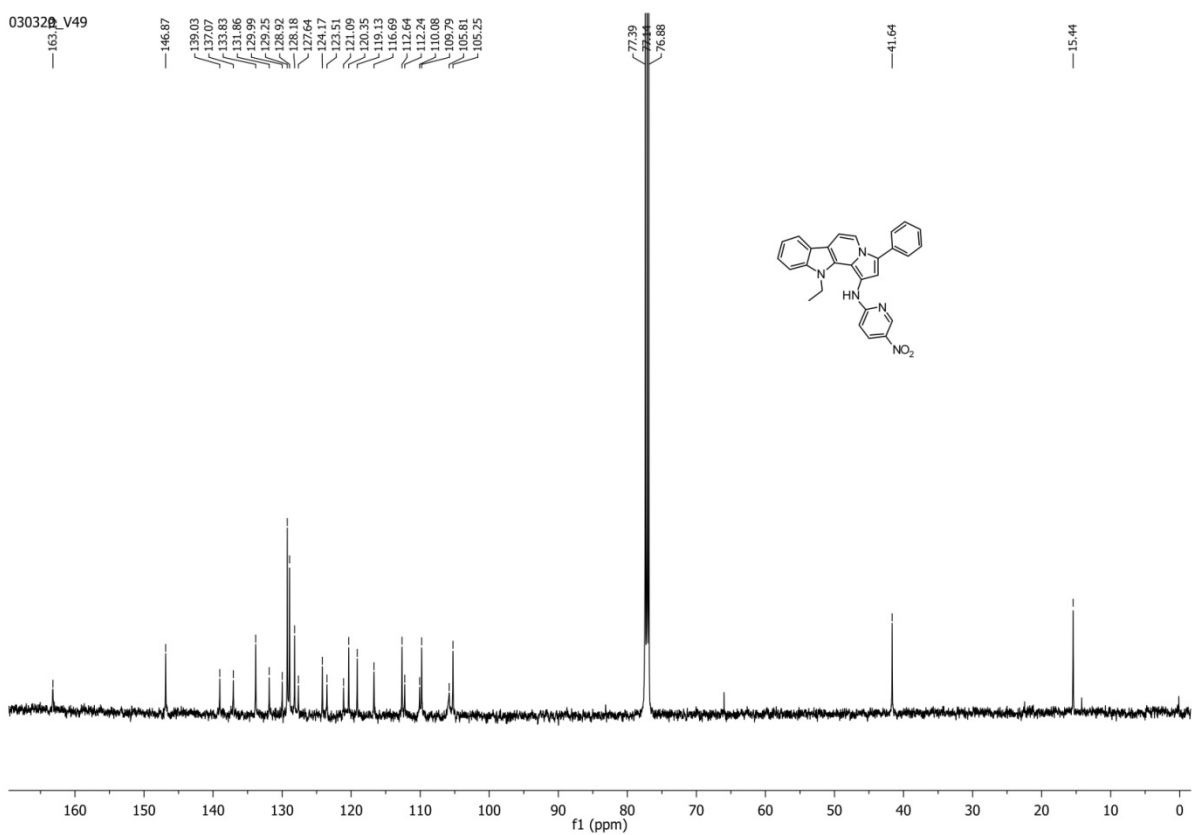

Figure S24. <sup>13</sup>C-NMR spectrum of 2aI.

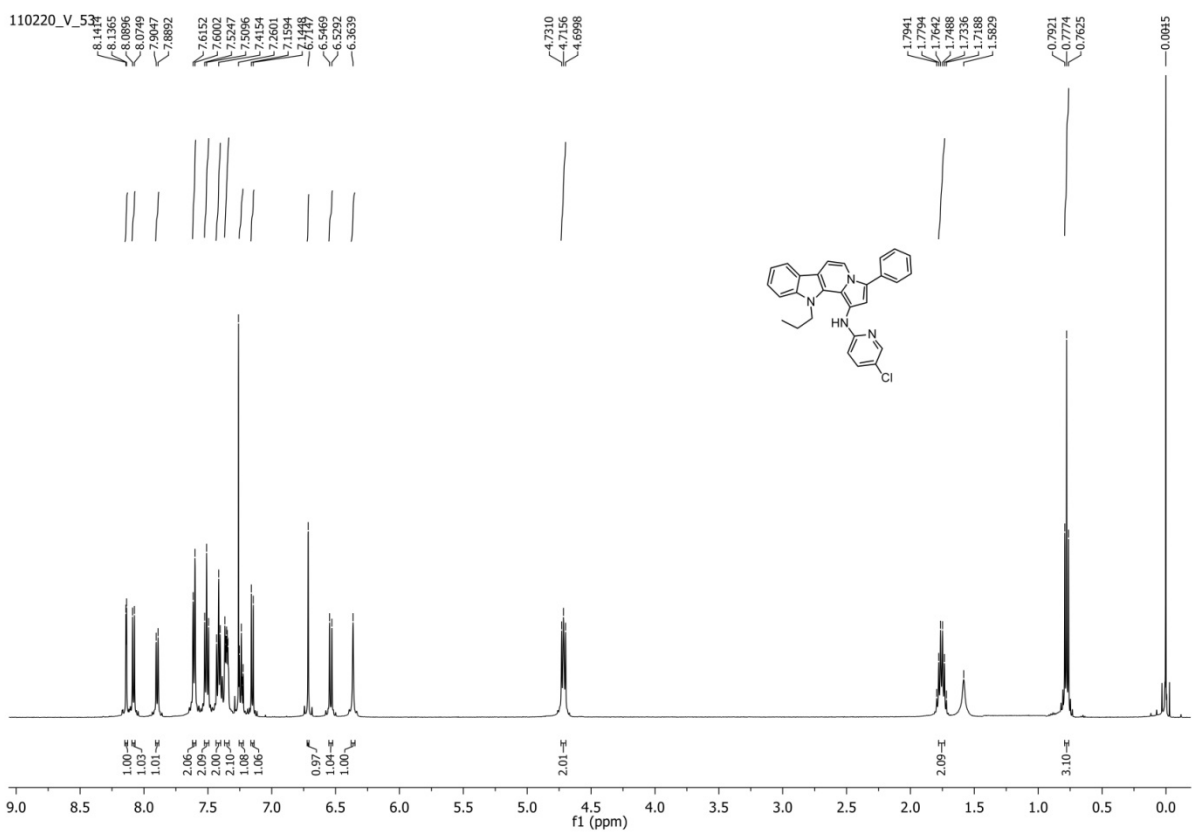

Figure S25.  $^1\text{H-NMR}$  spectrum of **3aC**.

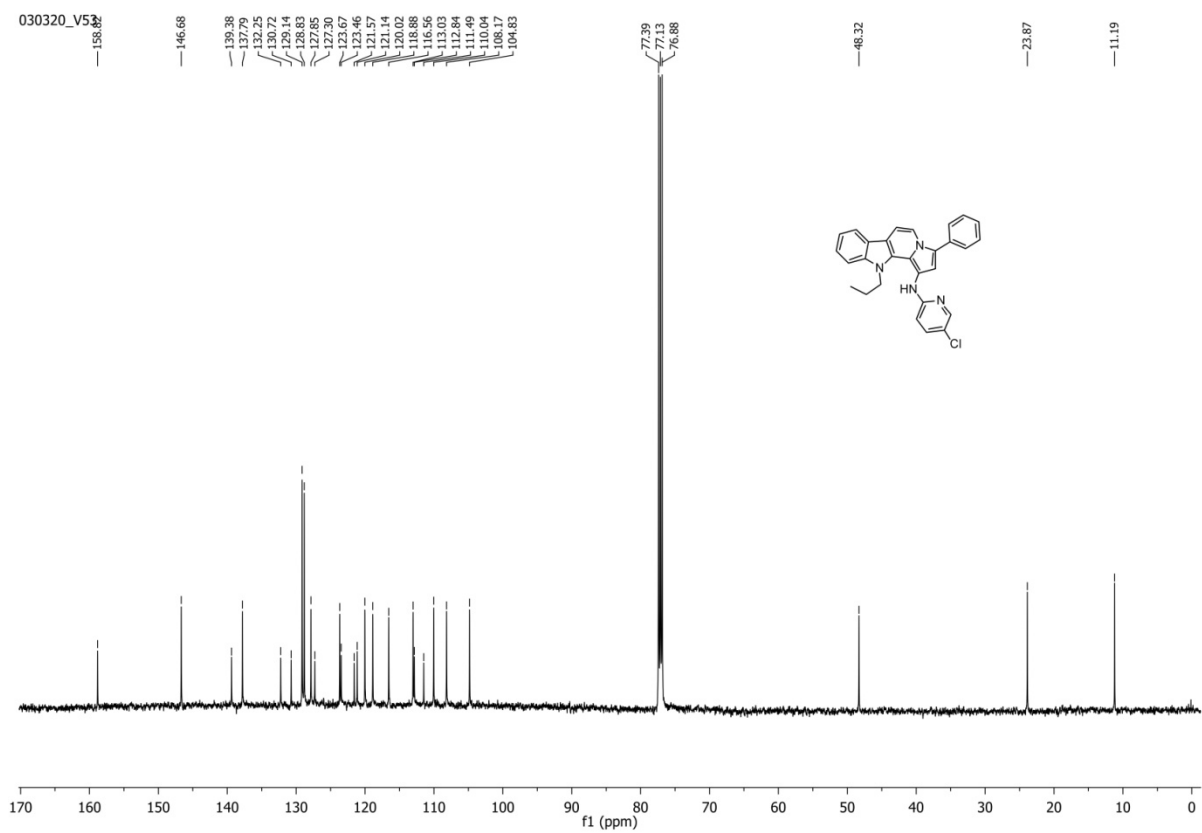

Figure S26.  $^{13}\text{C-NMR}$  spectrum of **3aC**.

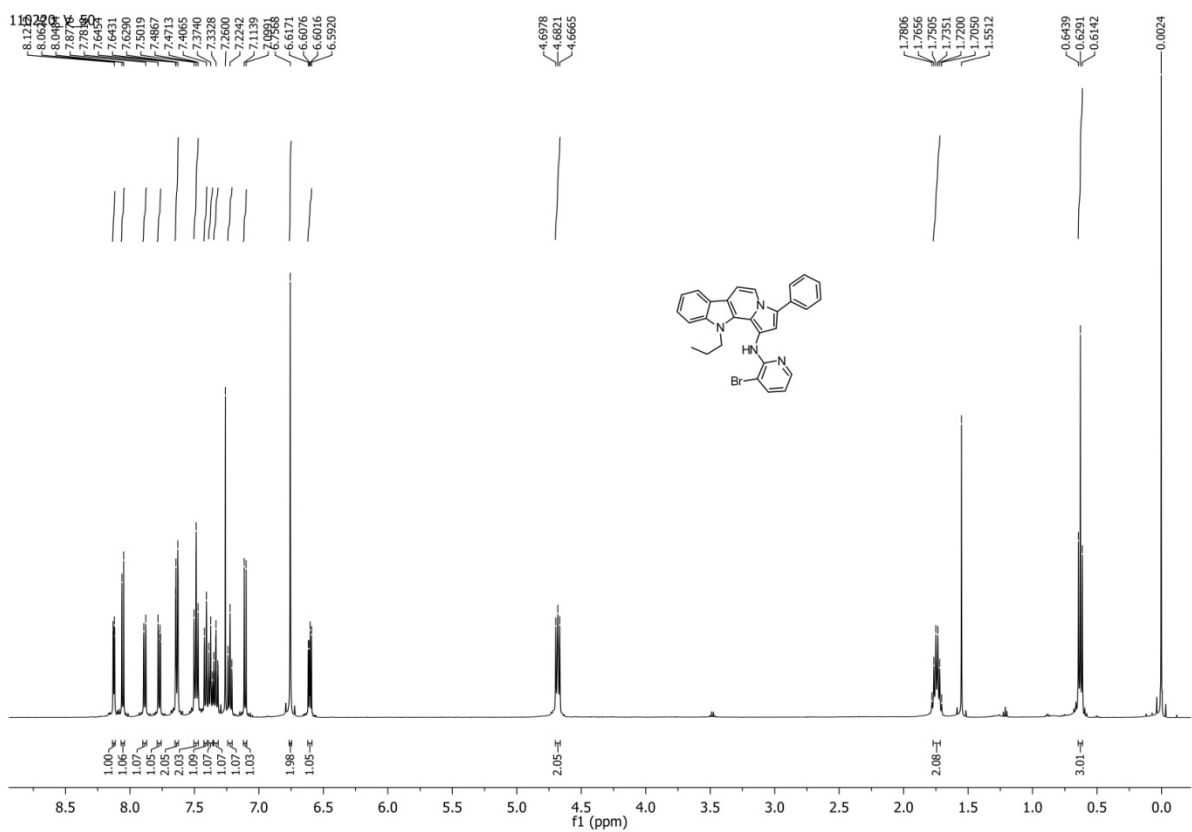

Figure S27. <sup>1</sup>H-NMR spectrum of 3aD.

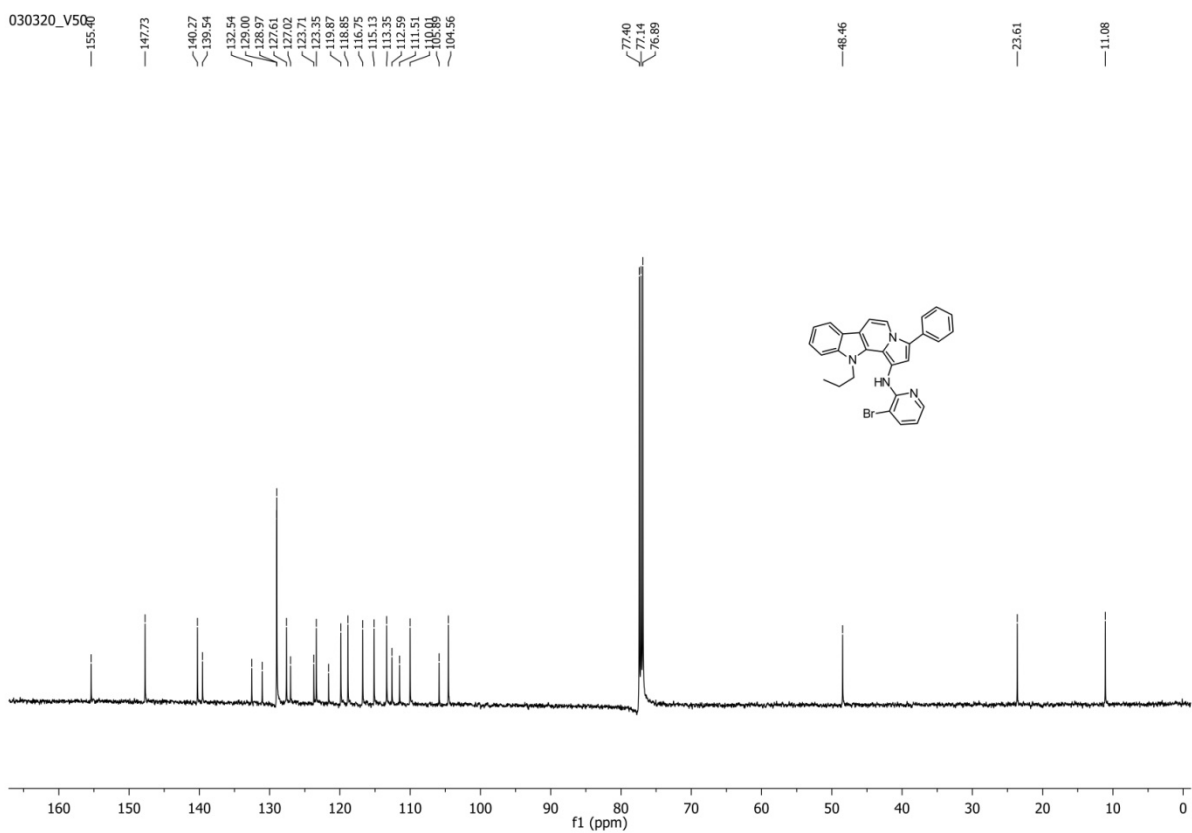

Figure S28. <sup>13</sup>C-NMR spectrum of 3aD.

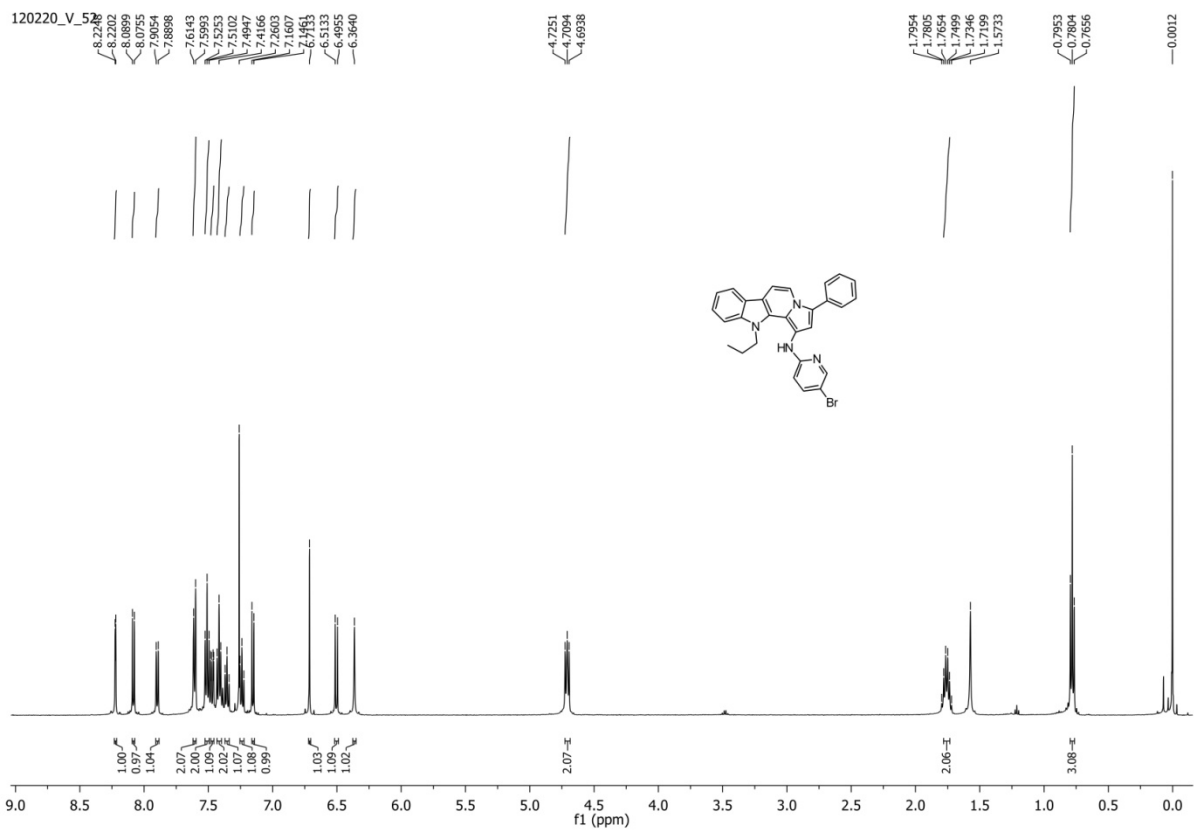

Figure S29.  $^1\text{H-NMR}$  spectrum of **3aE**.

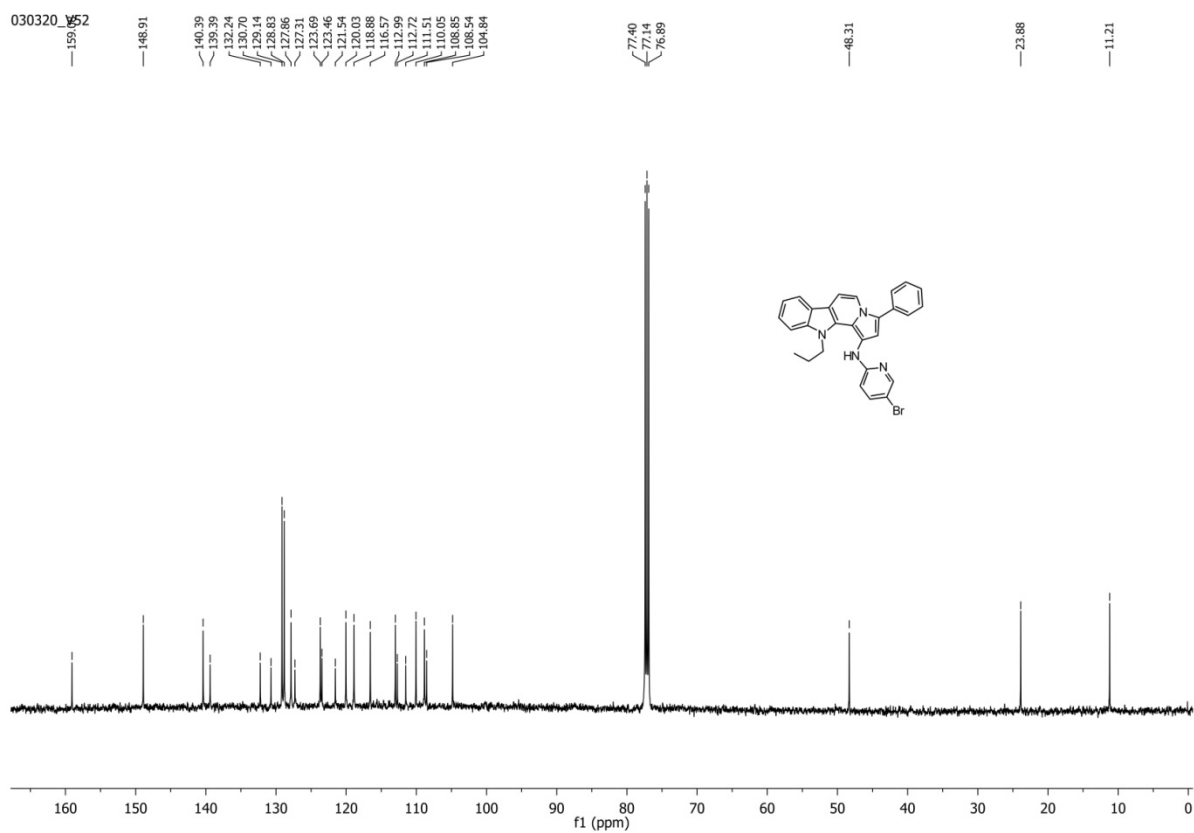

Figure S30.  $^{13}\text{C-NMR}$  spectrum of **3aE**.



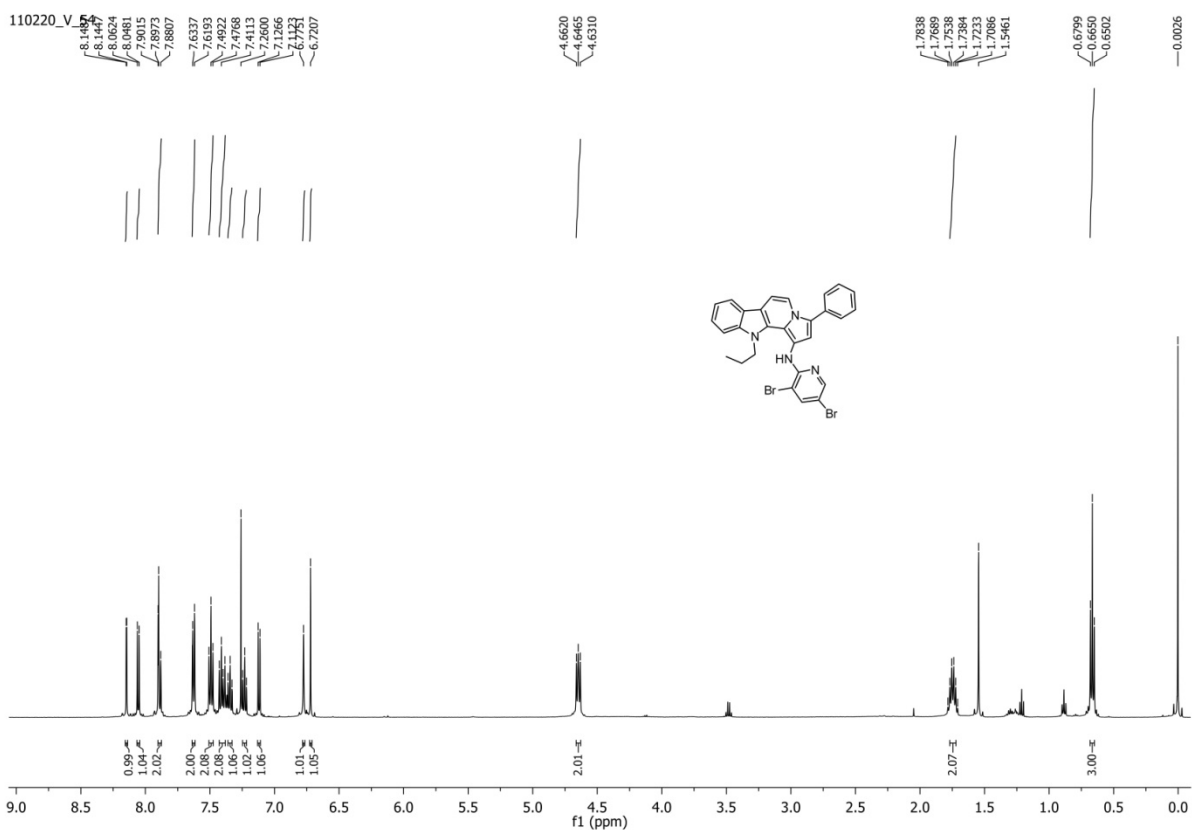

Figure S31.  $^1\text{H-NMR}$  spectrum of **3aH**.

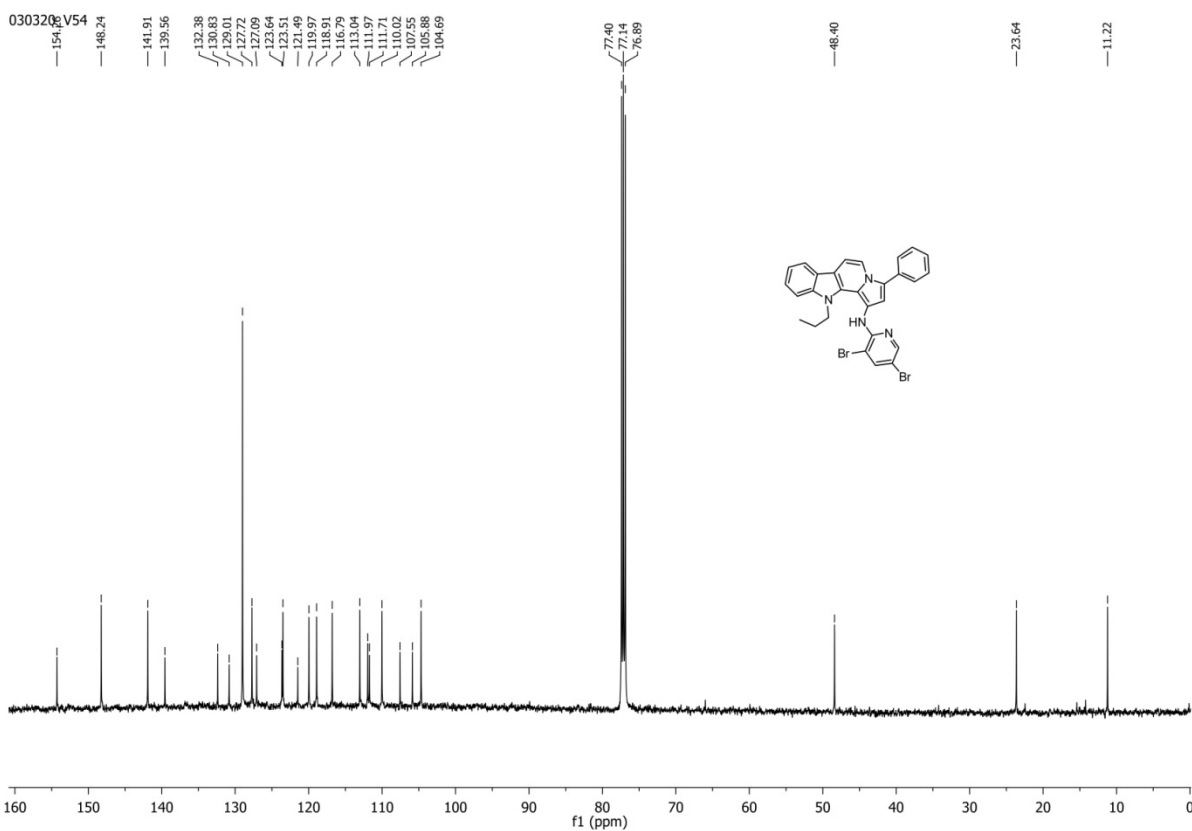

Figure S32.  $^{13}\text{C-NMR}$  spectrum of **3aH**.

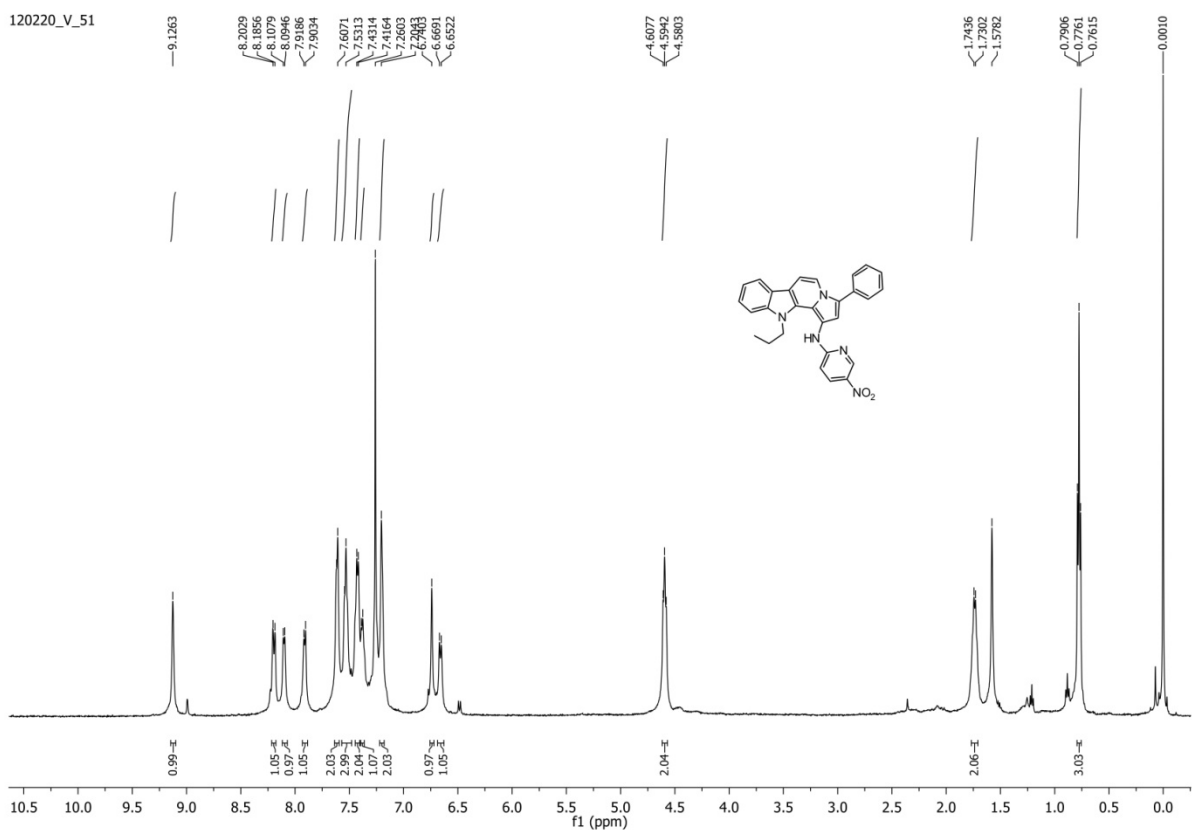

**Figure S33.**  $^1\text{H-NMR}$  spectrum of **3aI**.

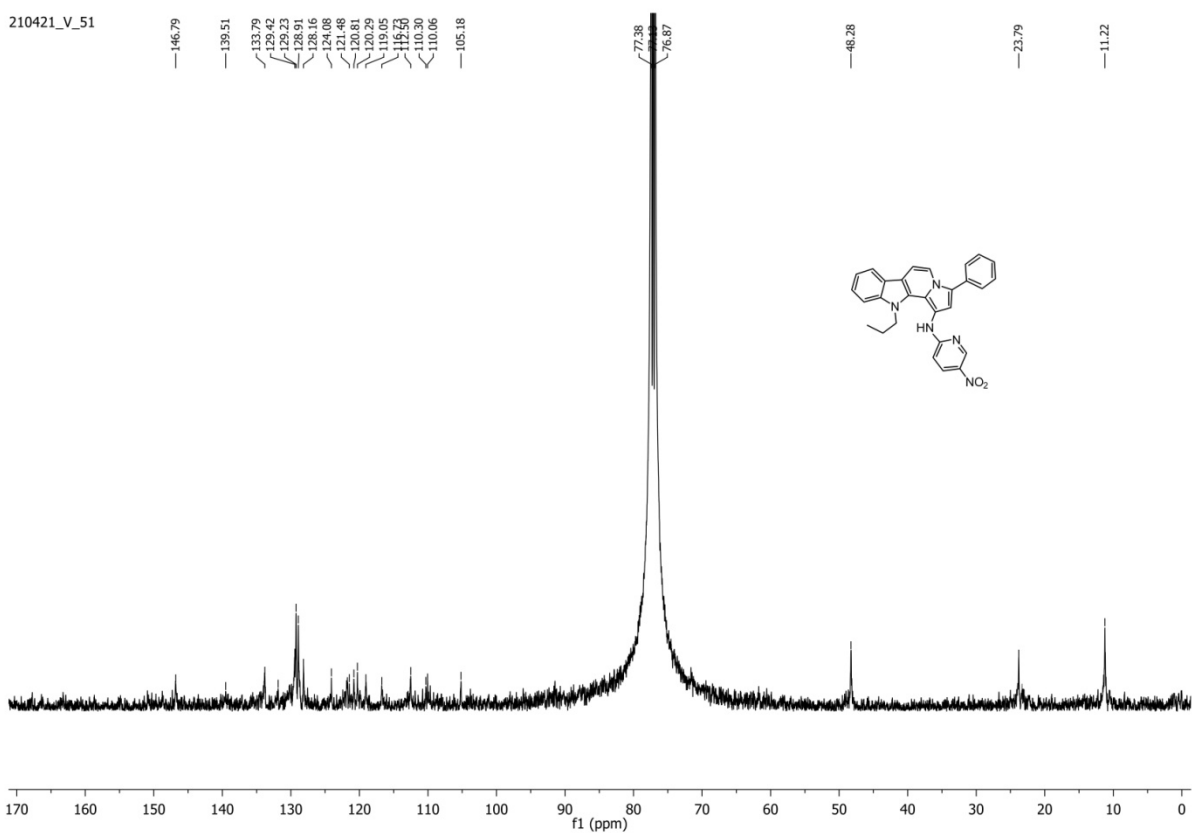

**Figure S34.**  $^{13}\text{C-NMR}$  spectrum of **3aI**. (Solubility problem in  $\text{CDCl}_3$  as well as  $\text{DMSO-d}_6$ )

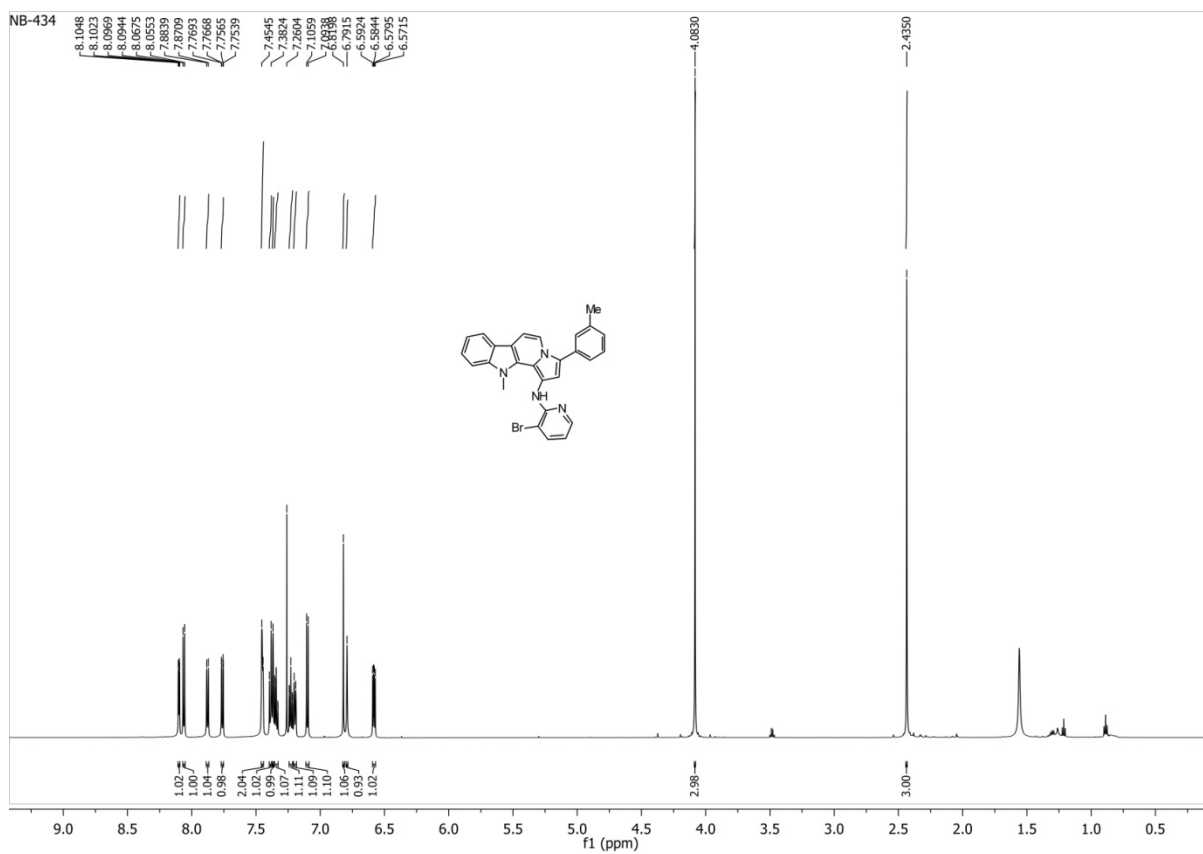

Figure S35.  $^1\text{H}$ -NMR spectrum of **1bD**.

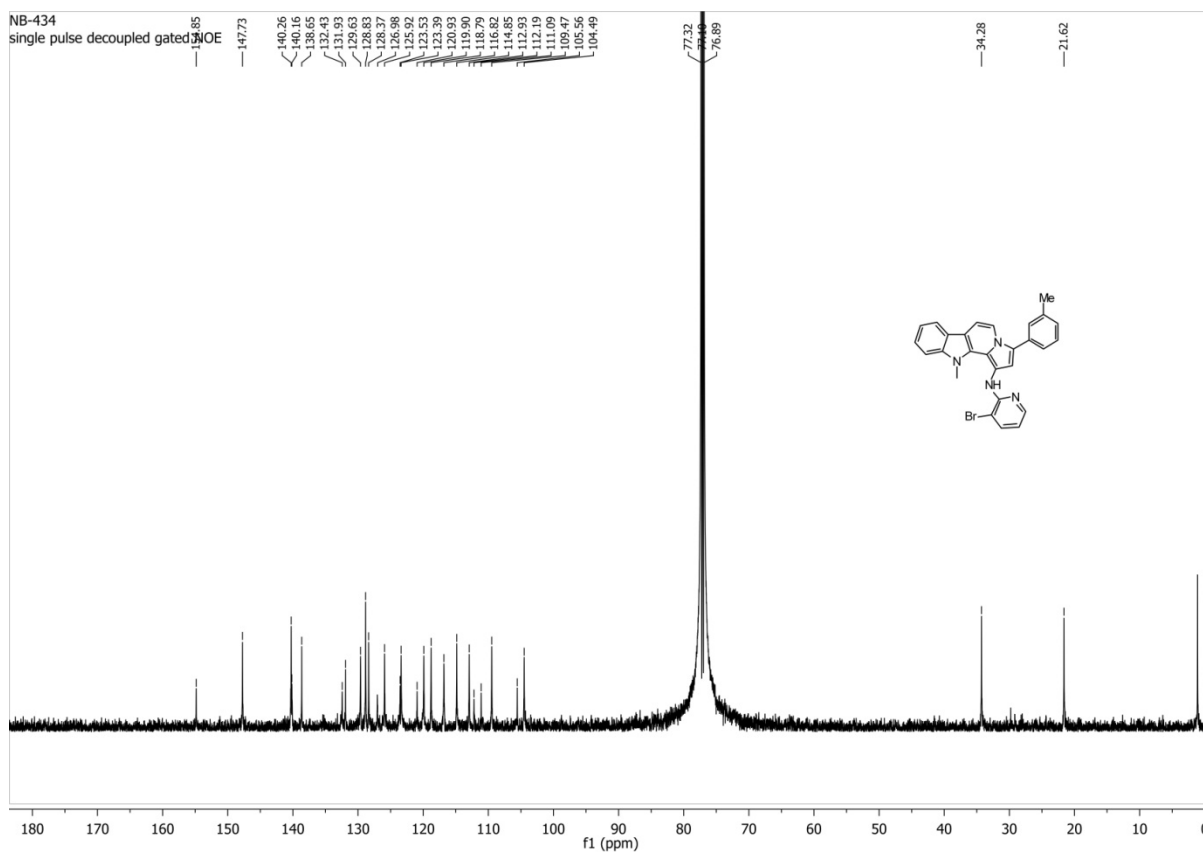

Figure S36.  $^{13}\text{C}$ -NMR spectrum of **1bD**.

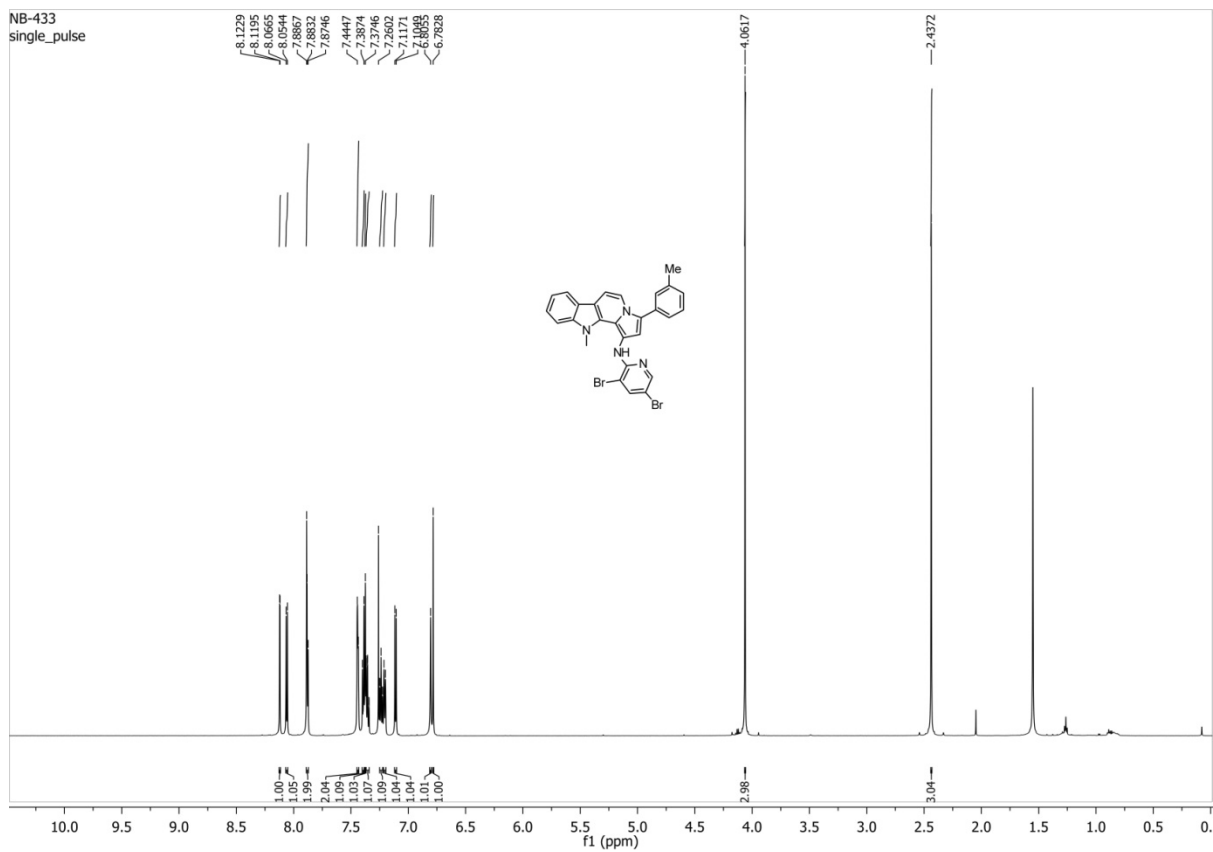

Figure S37.  $^1\text{H}$ -NMR spectrum of **1bH**.

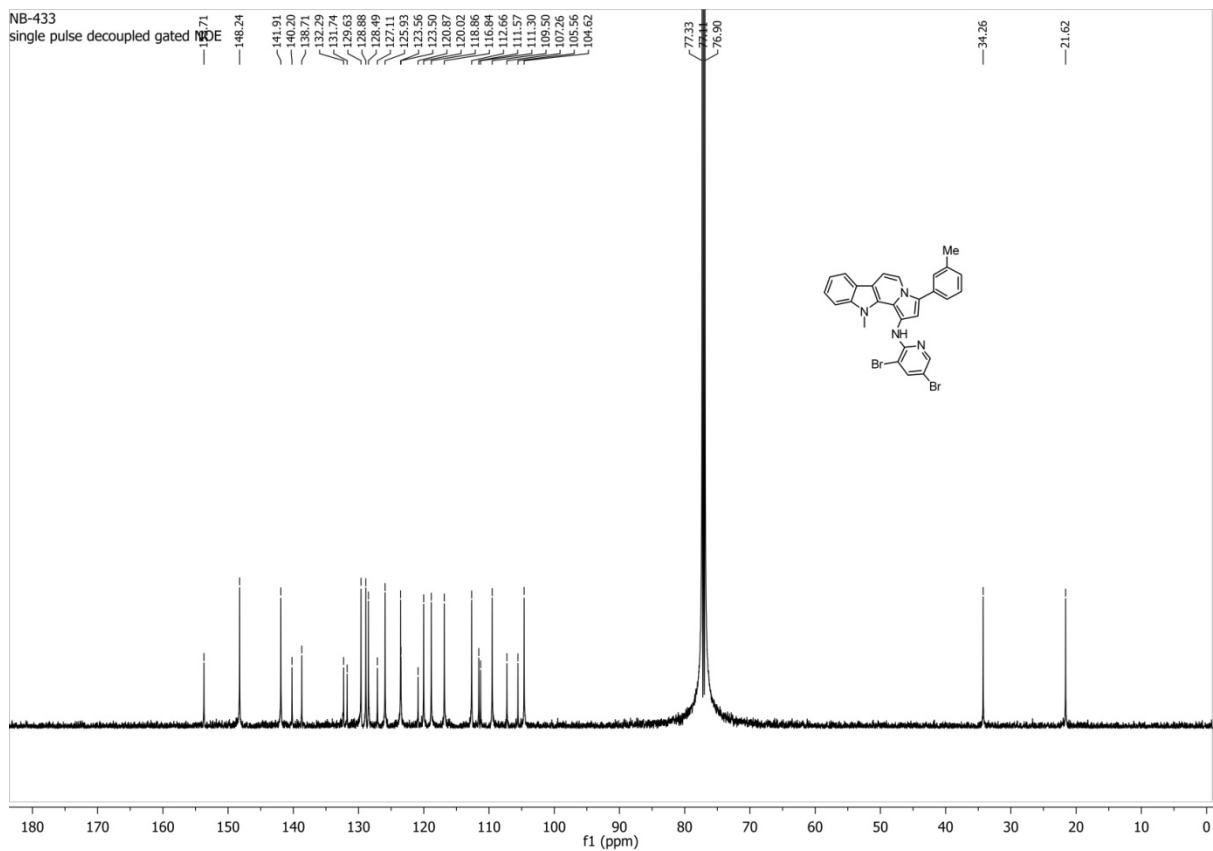

Figure S38.  $^{13}\text{C}$ -NMR spectrum of **1bH**.

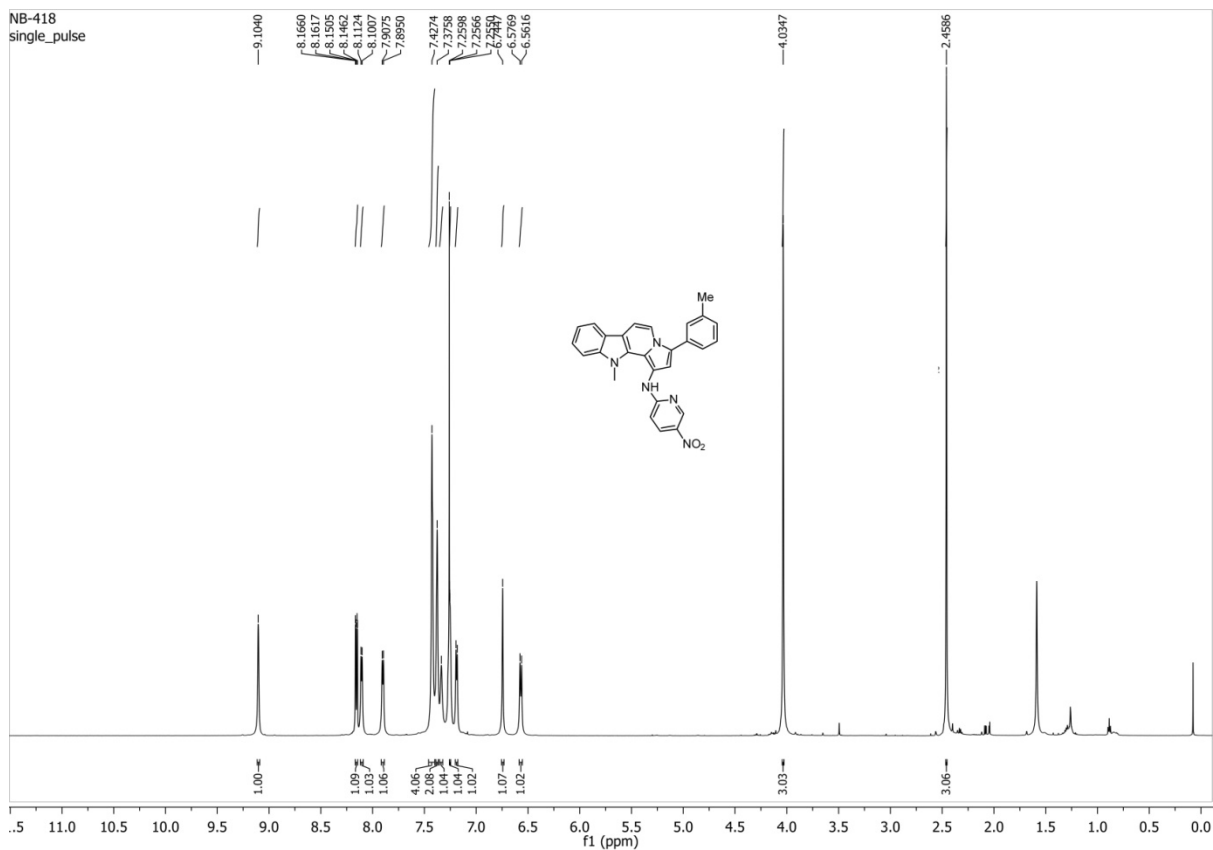

Figure S39.  $^1\text{H}$ -NMR spectrum of **1bl**.

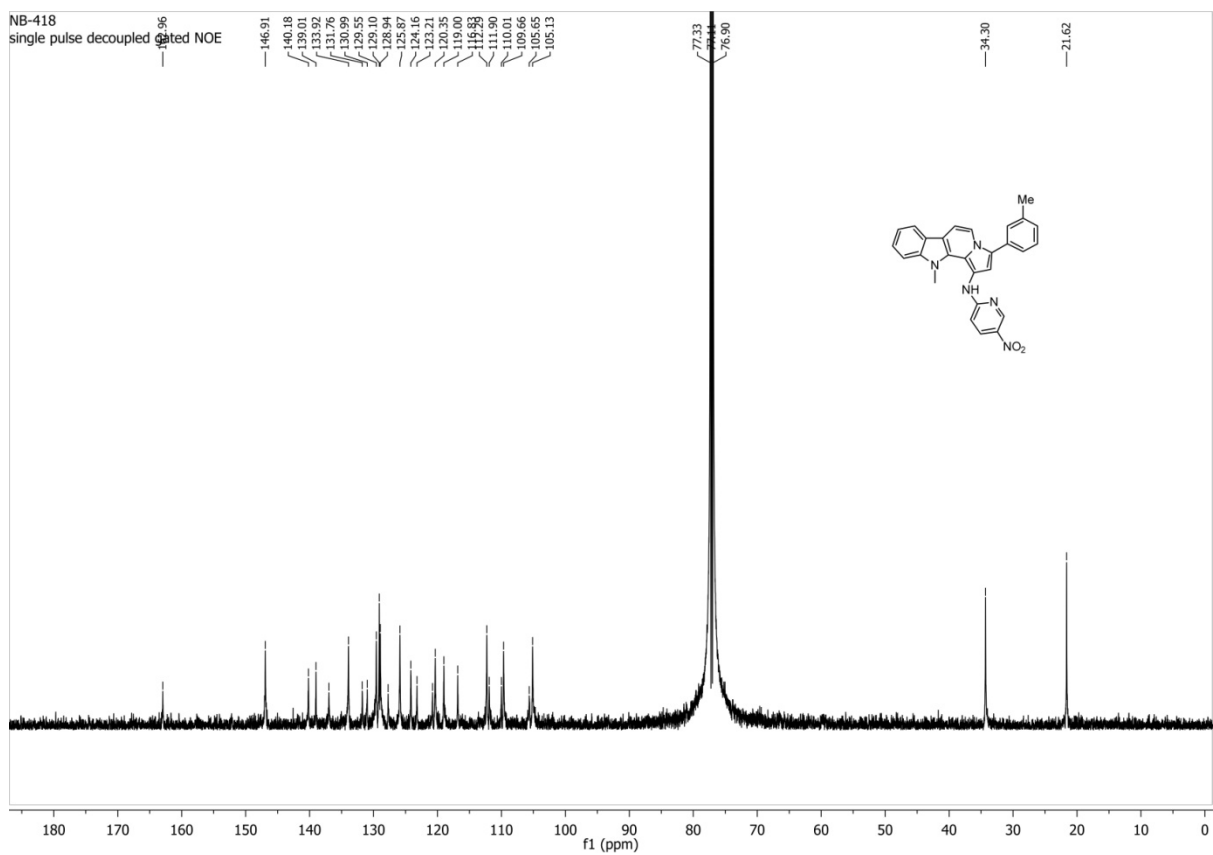

Figure S40.  $^{13}\text{C}$ -NMR spectrum of **1bl**.

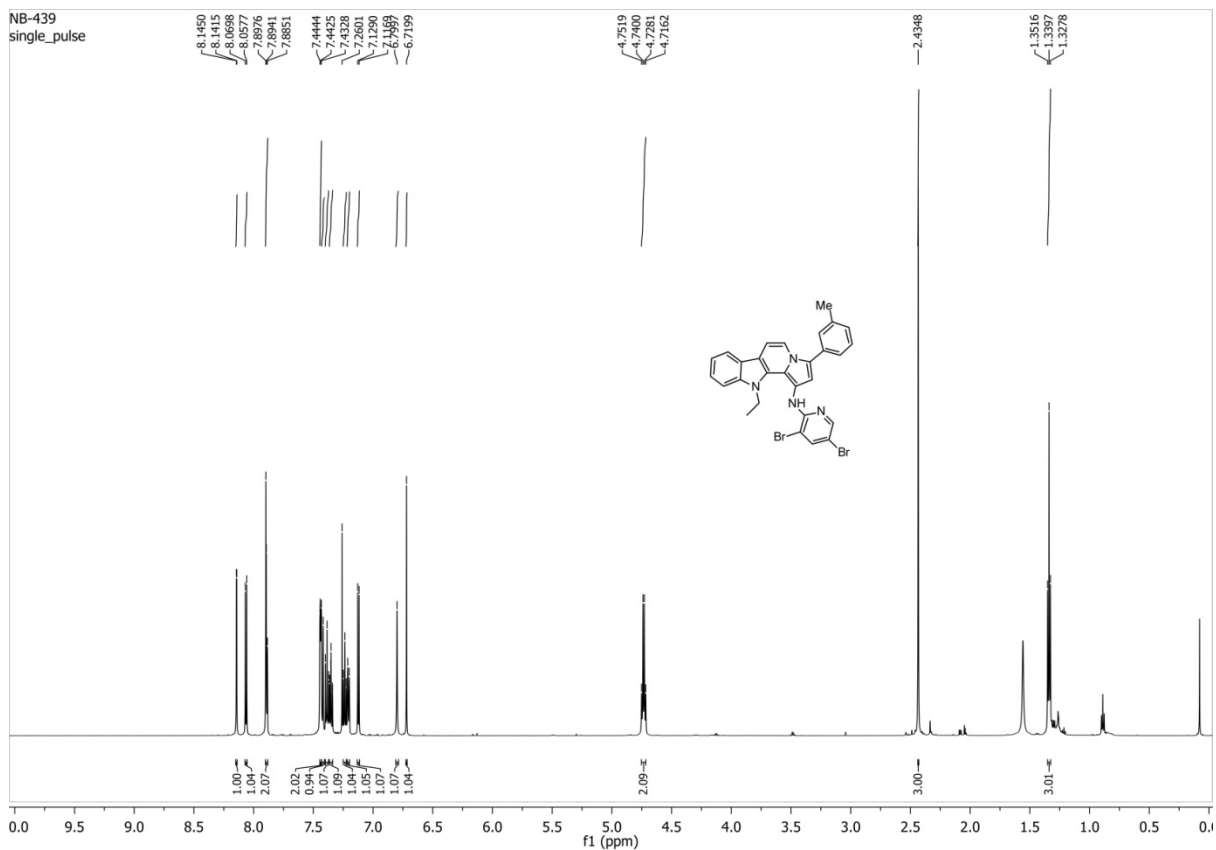

Figure S41.  $^1\text{H}$ -NMR spectrum of 2bH.

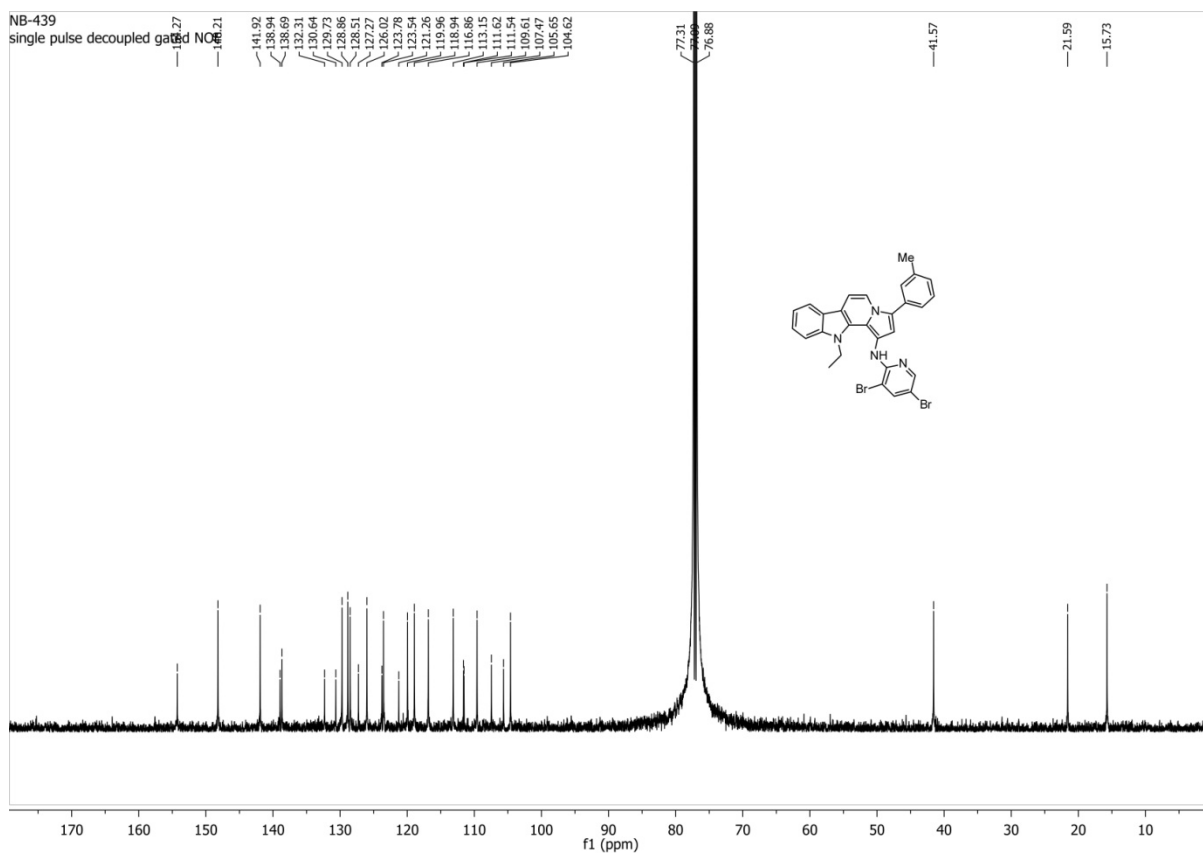

Figure S42.  $^{13}\text{C}$ -NMR spectrum of 2bH.

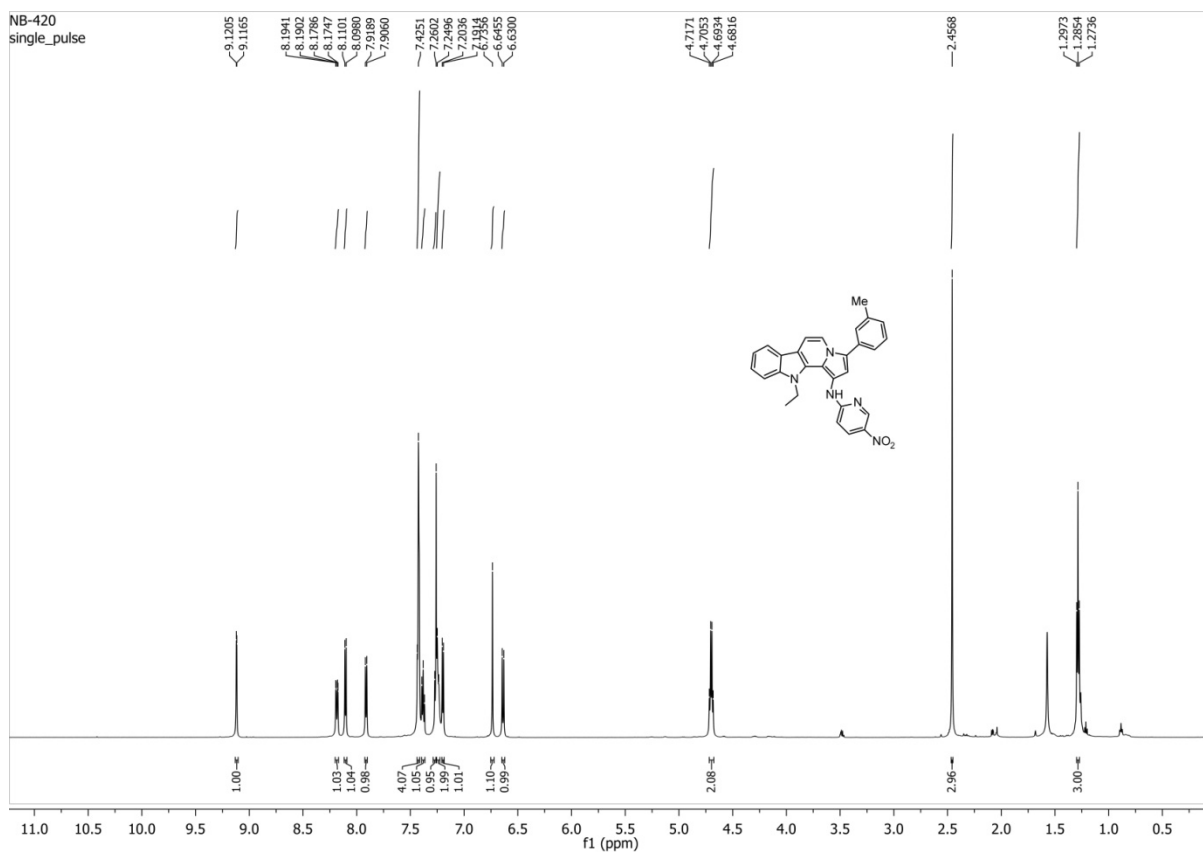

Figure S43.  $^1\text{H-NMR}$  spectrum of **2bl**.

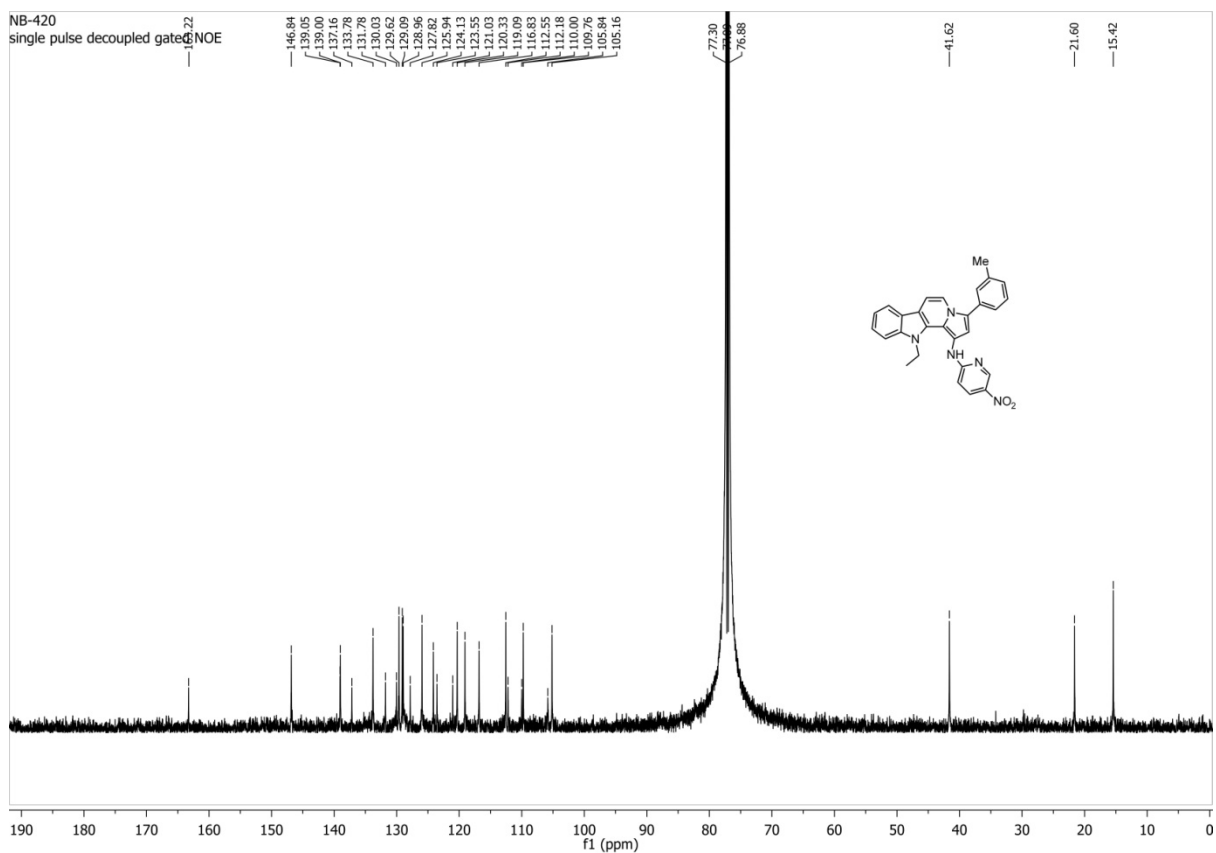

Figure S44.  $^{13}\text{C-NMR}$  spectrum of **2bl**.





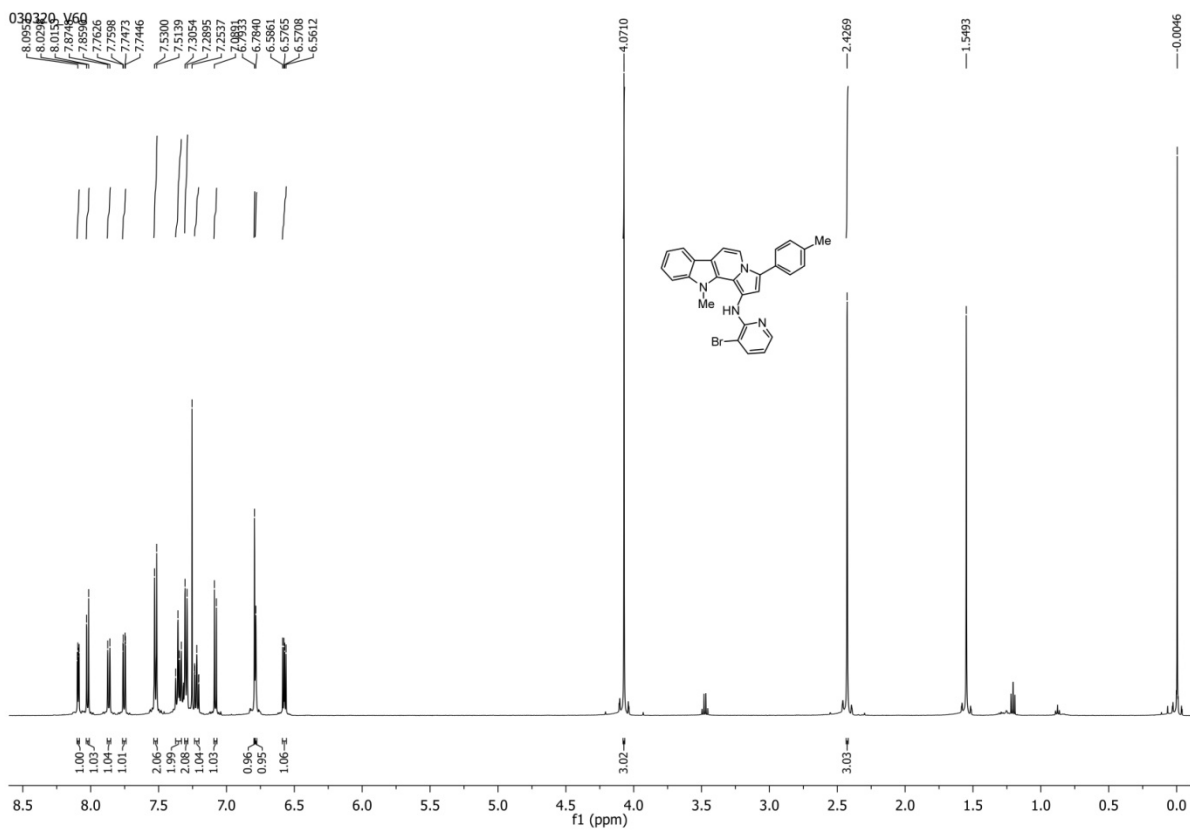

Figure S47.  $^1\text{H-NMR}$  spectrum of **1cD**.

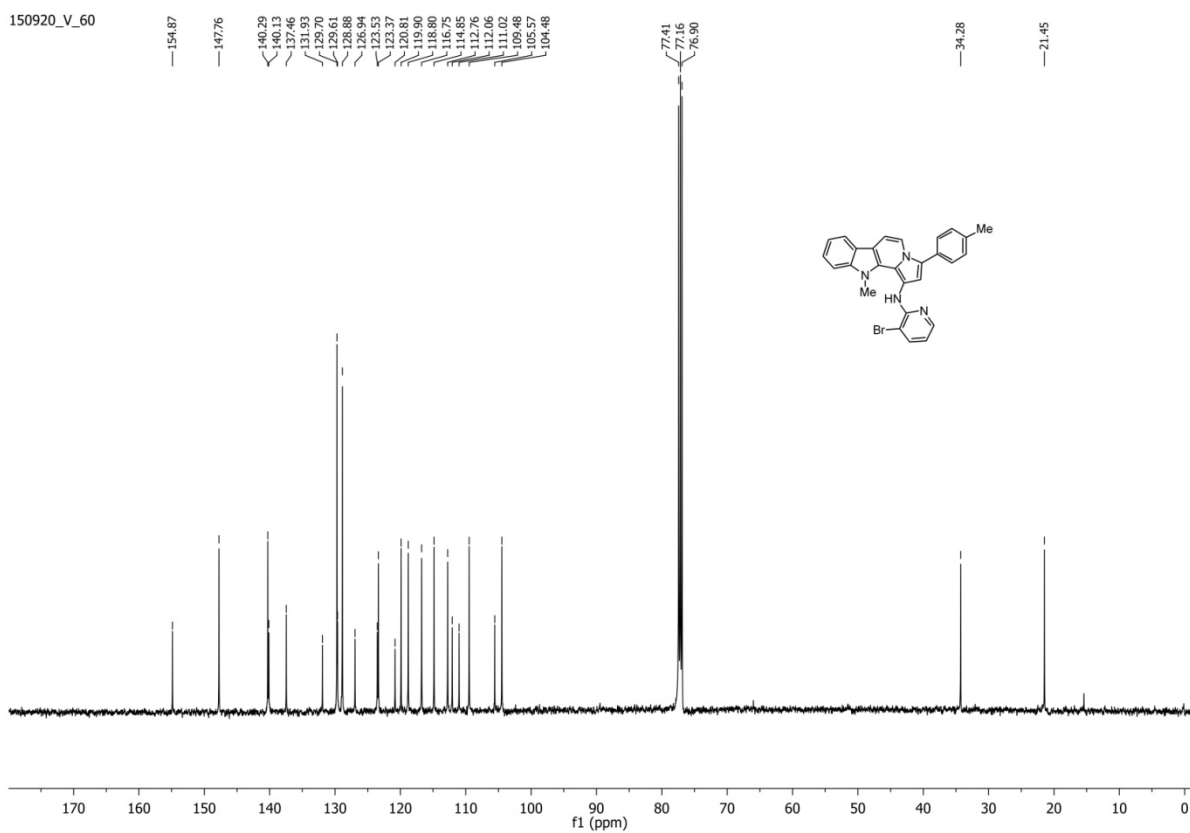

Figure S48.  $^{13}\text{C-NMR}$  spectrum of **1cD**.

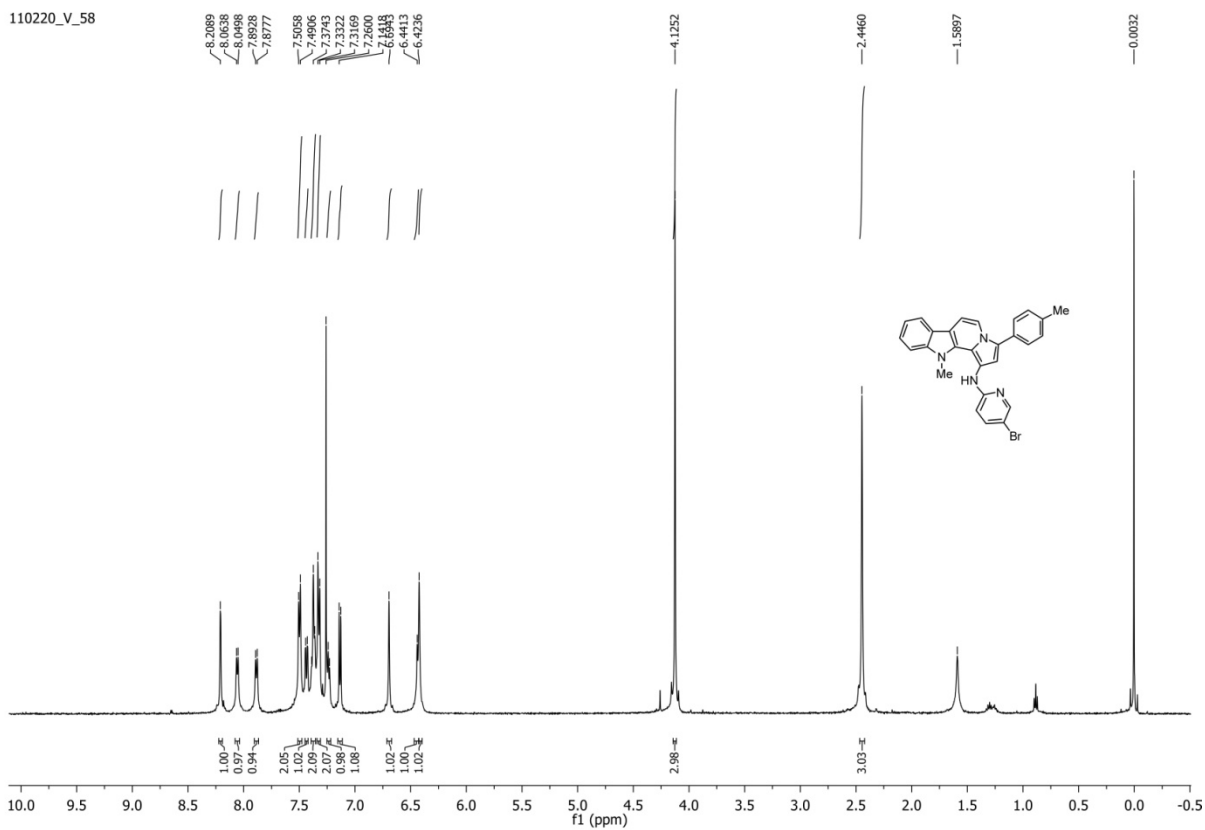

Figure S49.  $^1\text{H-NMR}$  spectrum of **1cE**.

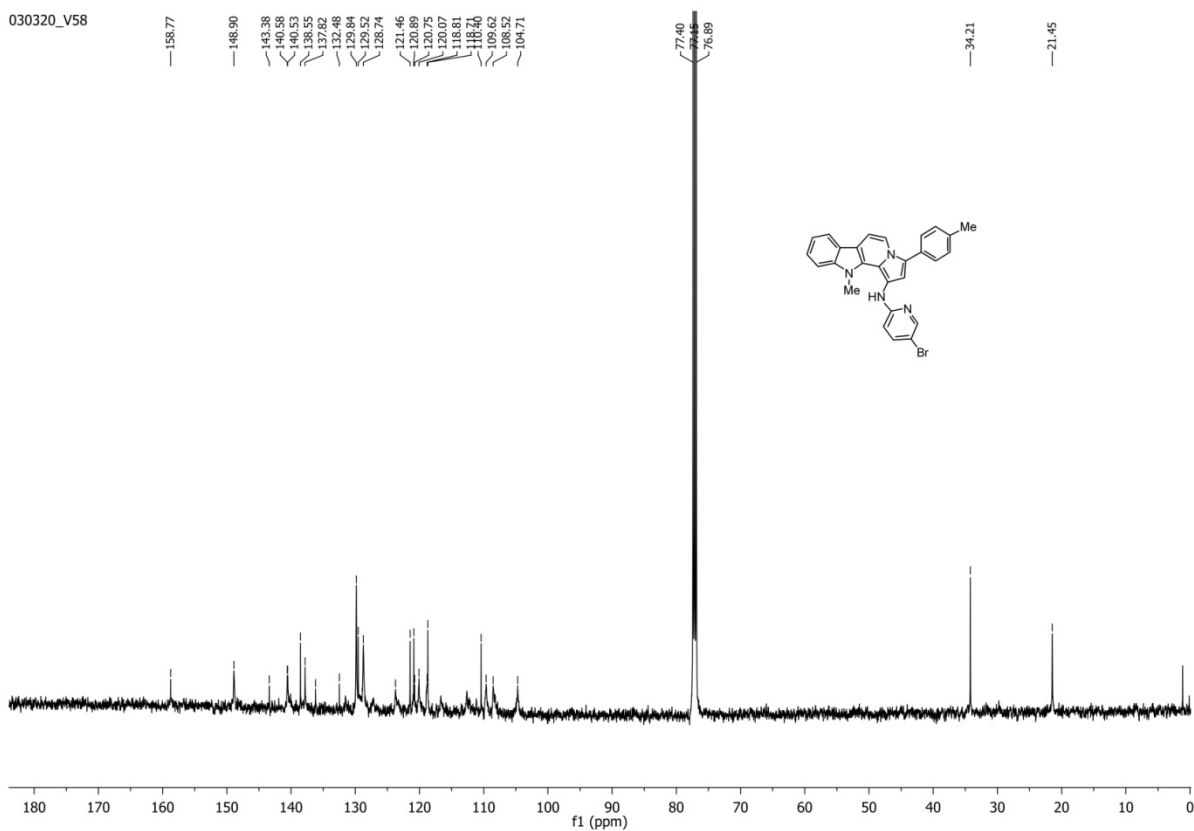

Figure S50.  $^{13}\text{C-NMR}$  spectrum of **1cE**.

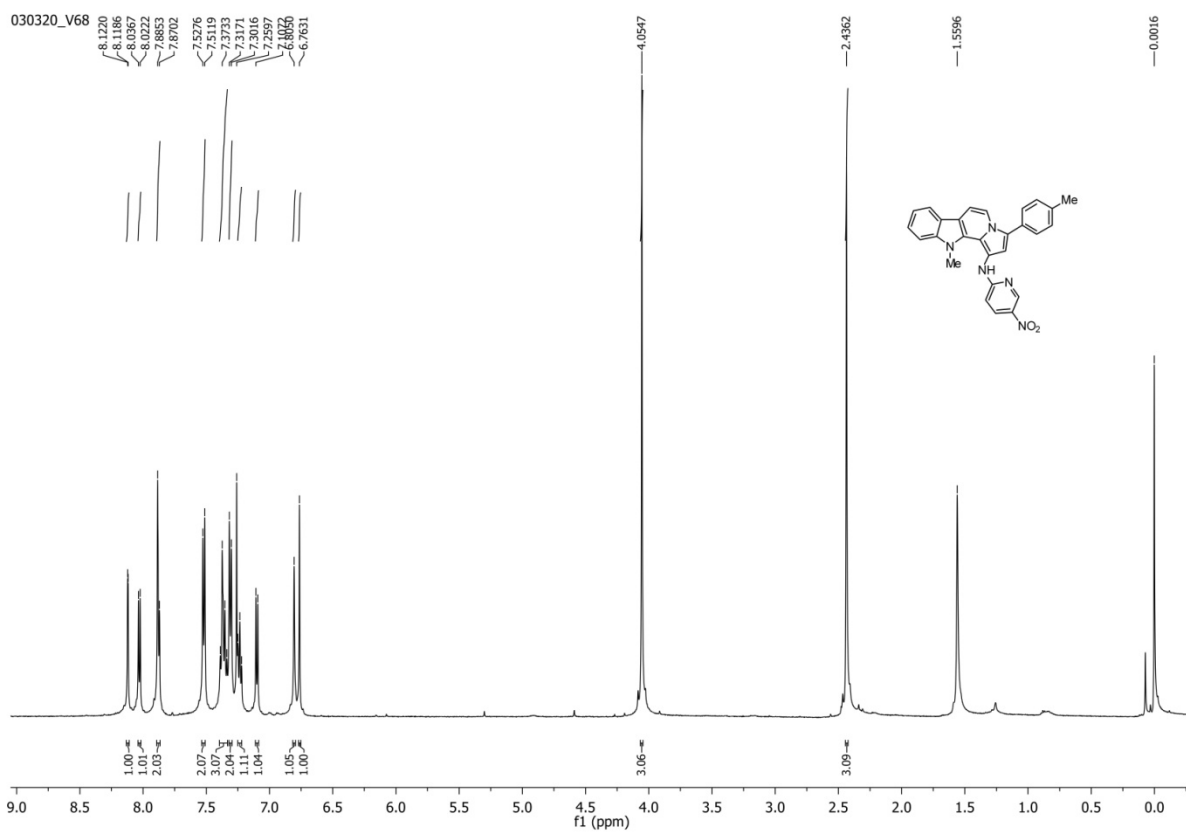

Figure S51.  $^1\text{H-NMR}$  spectrum of **1c**.

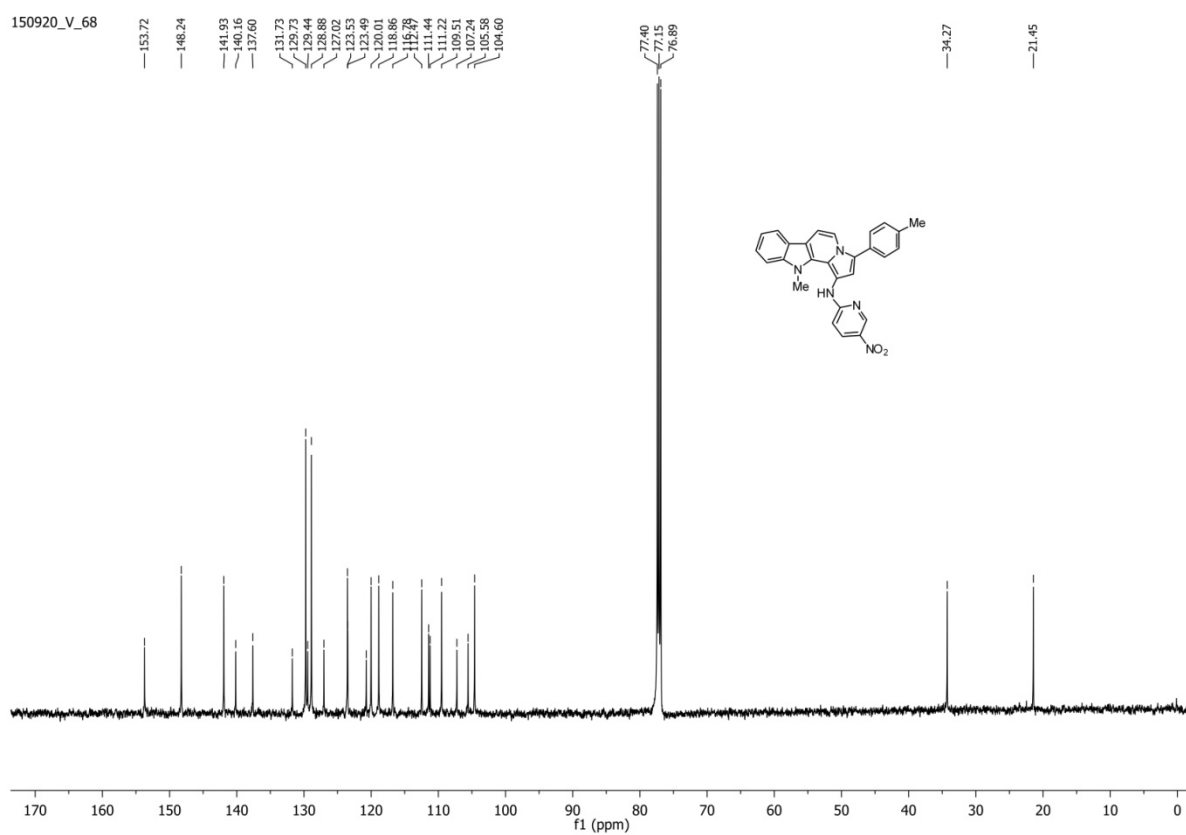

Figure S52.  $^{13}\text{C-NMR}$  spectrum of **1c**.

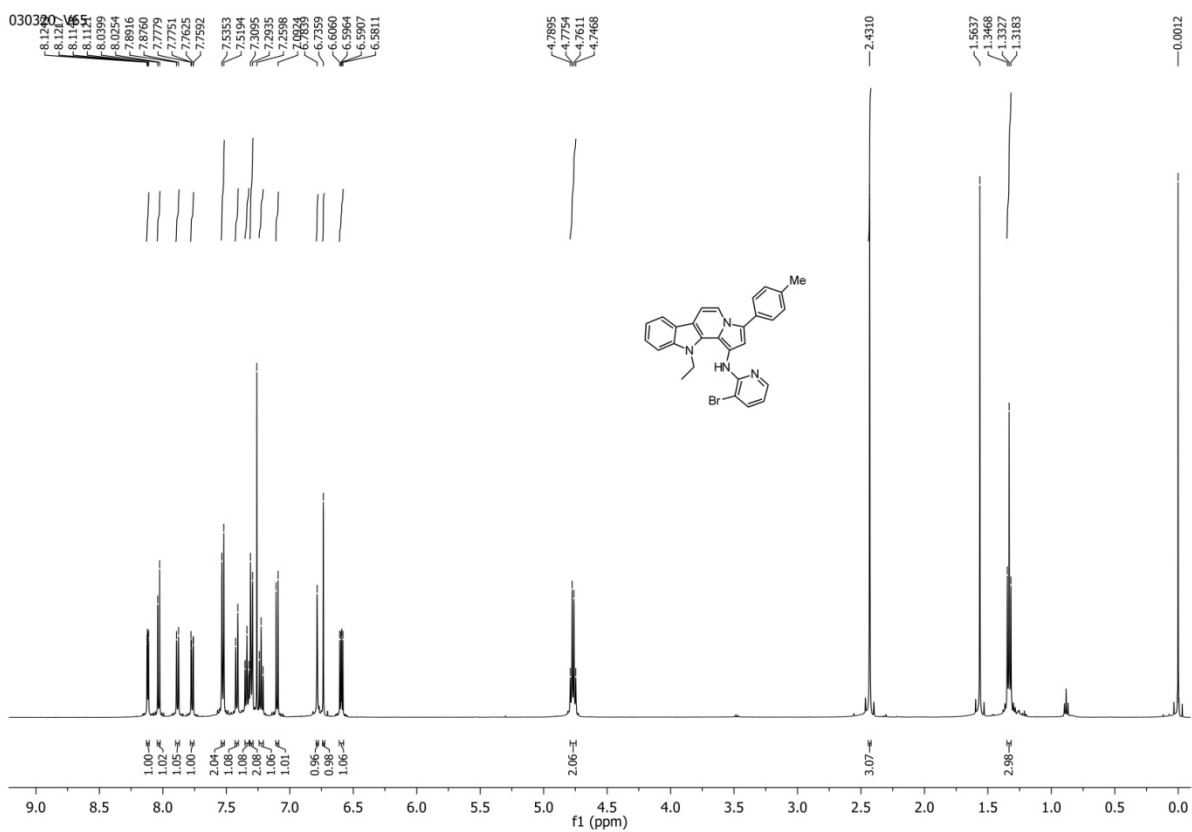

Figure S53.  $^1\text{H-NMR}$  spectrum of 2cD.

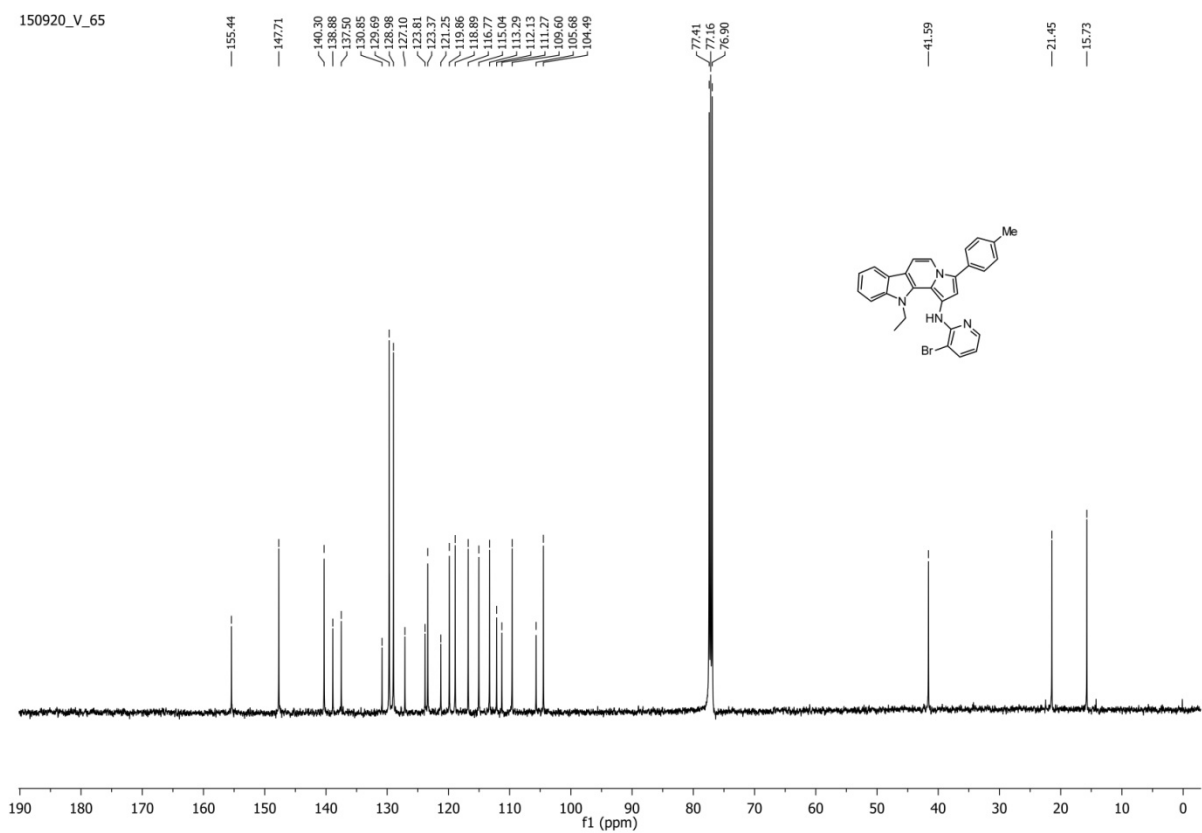

Figure S54.  $^{13}\text{C-NMR}$  spectrum of 2cD.

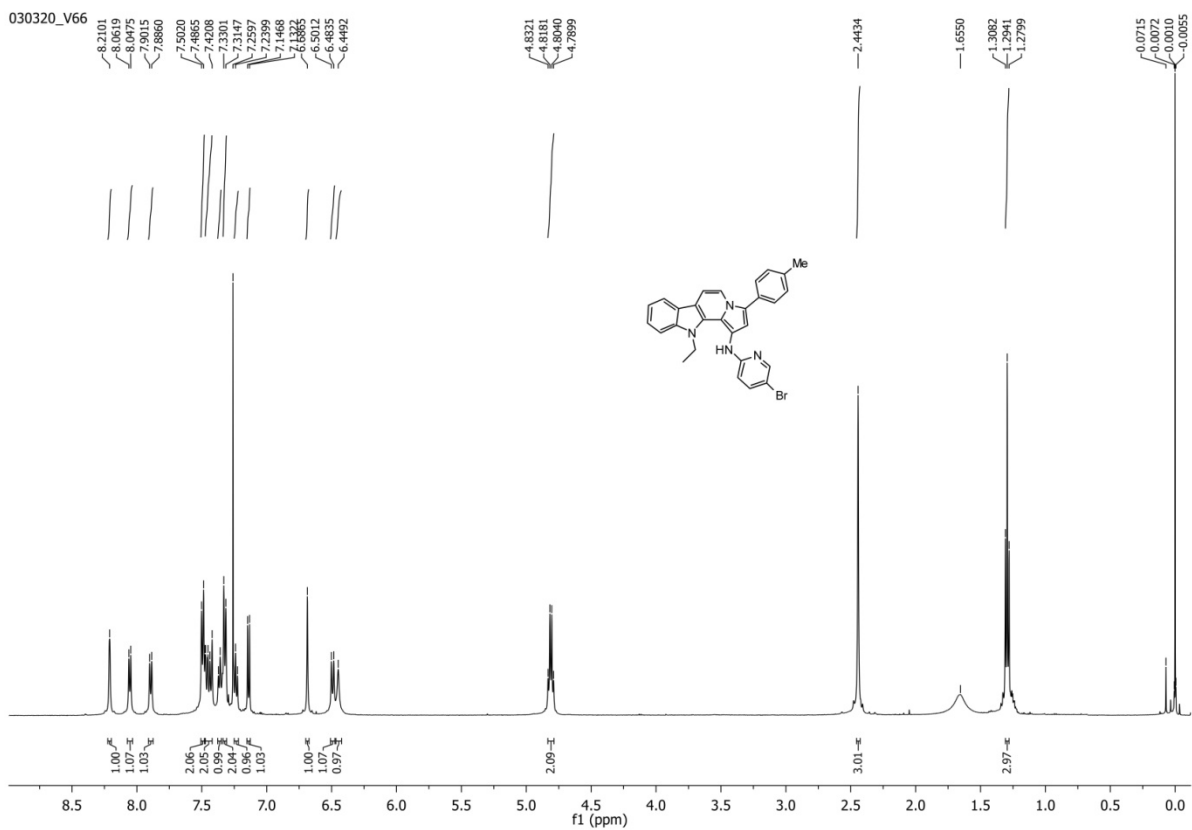

Figure S55.  $^1\text{H-NMR}$  spectrum of **2cE**.

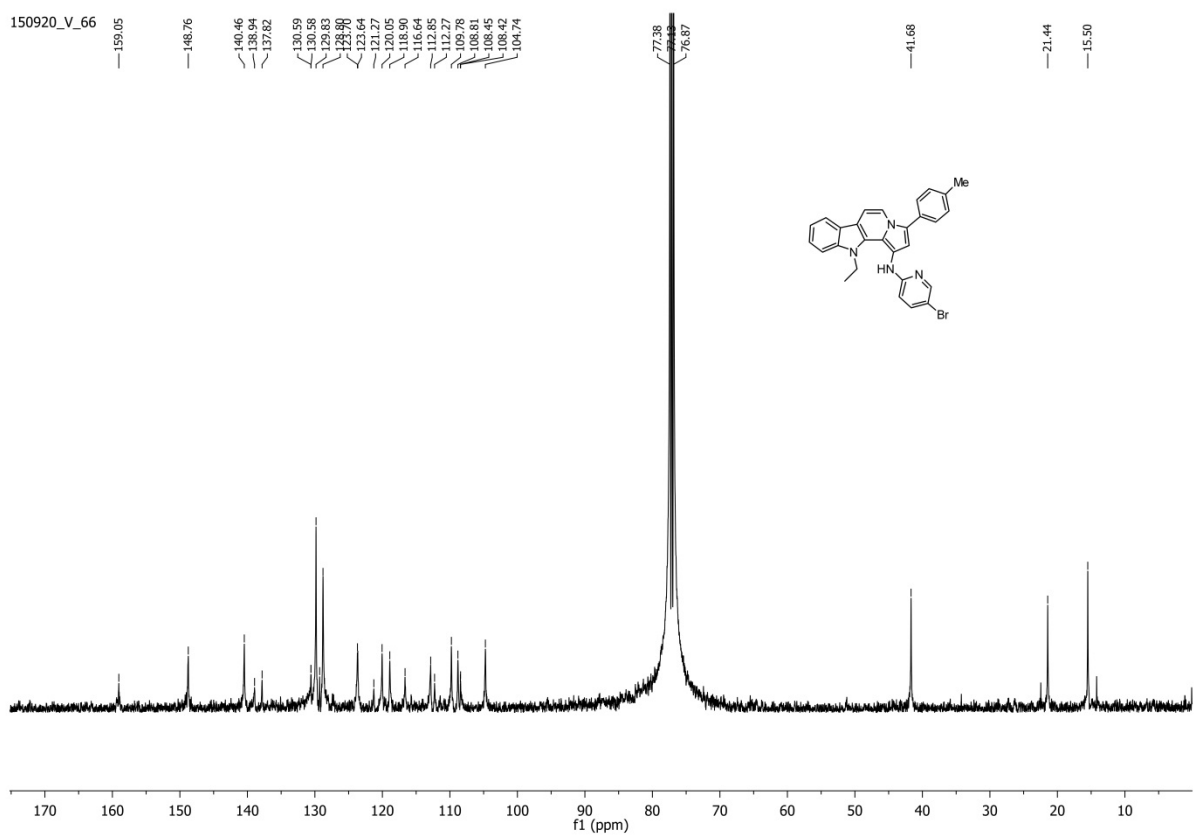

Figure S56.  $^{13}\text{C-NMR}$  spectrum of **2cE**.

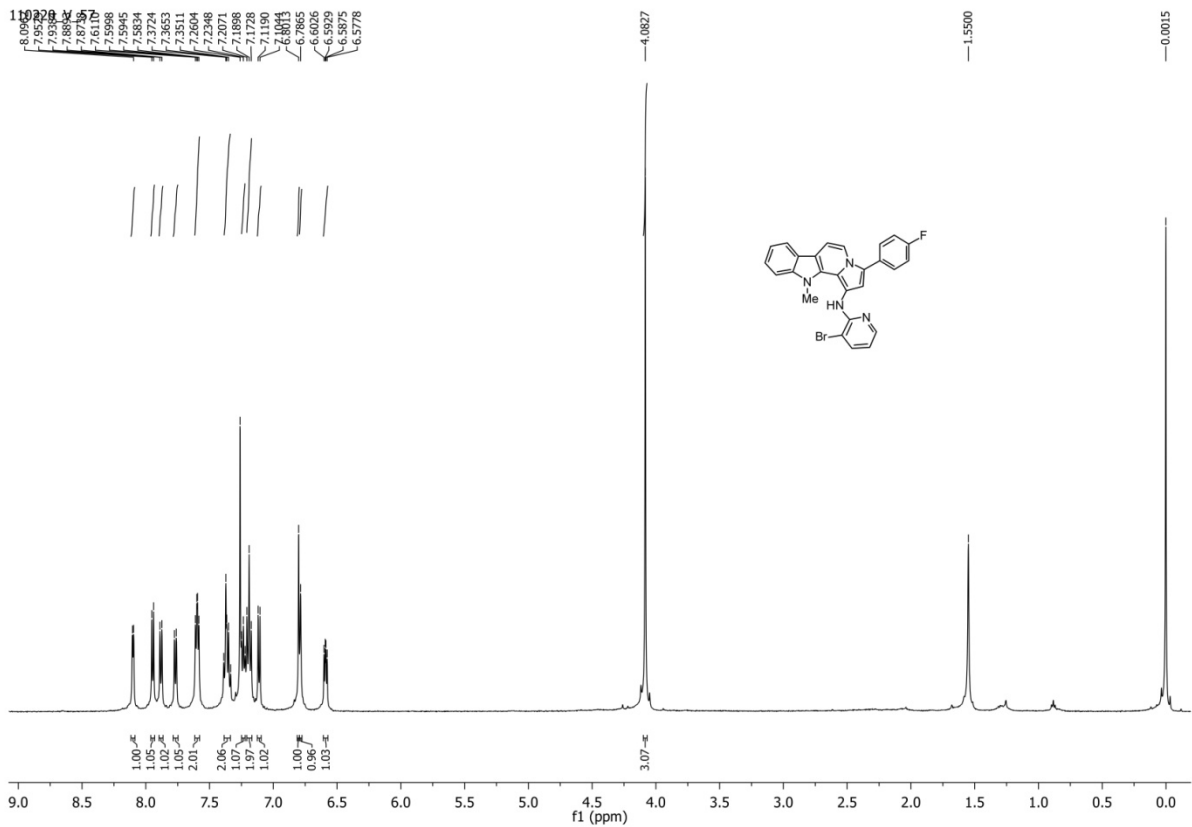

Figure S57. <sup>1</sup>H-NMR spectrum of 1dD.

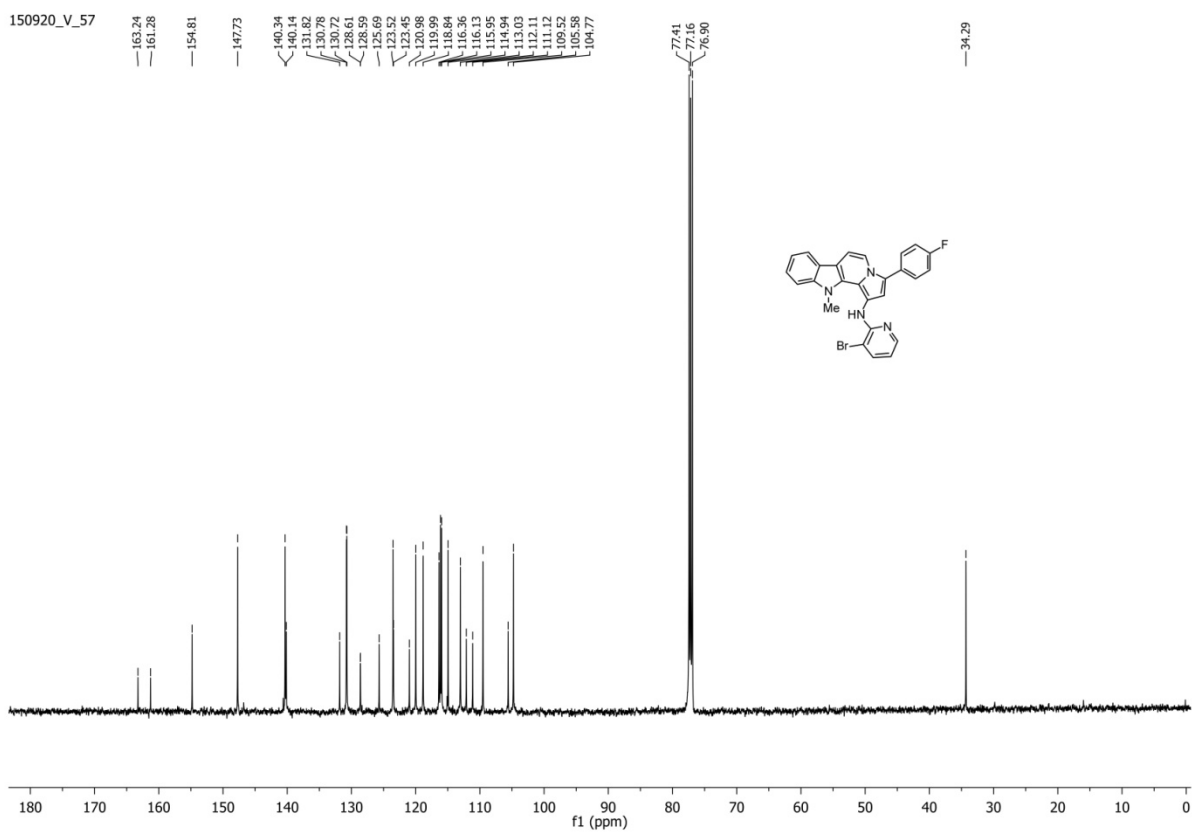

Figure S58. <sup>13</sup>C-NMR spectrum of 1dD.

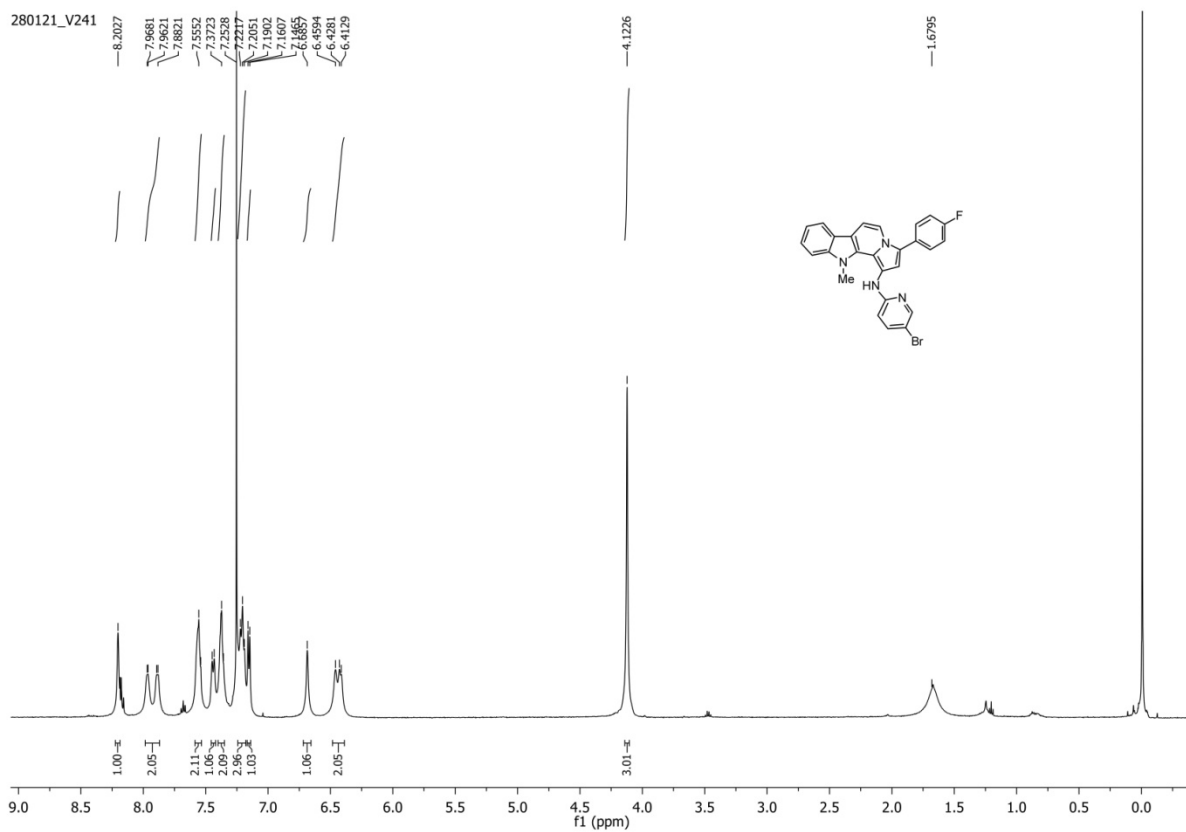

Figure S59.  $^1\text{H-NMR}$  spectrum of **1dE**.

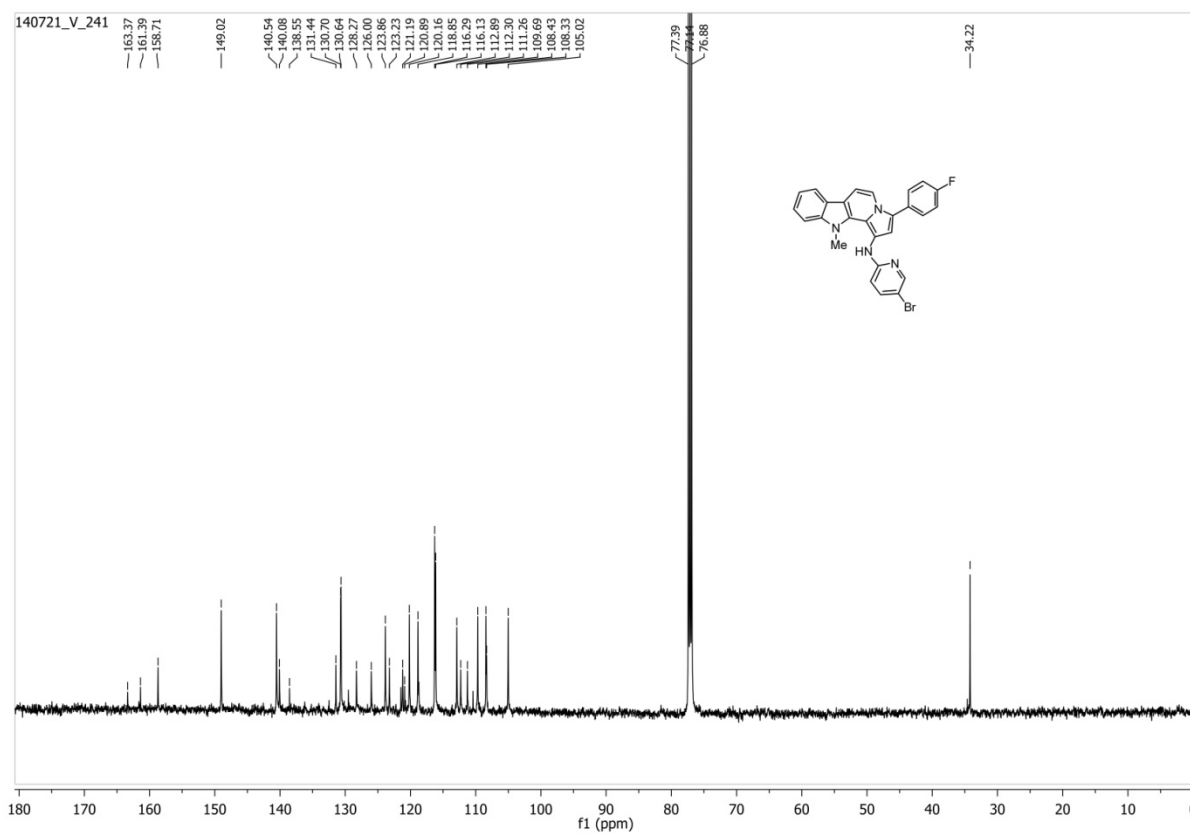

Figure S60.  $^{13}\text{C-NMR}$  spectrum of **1dE**.

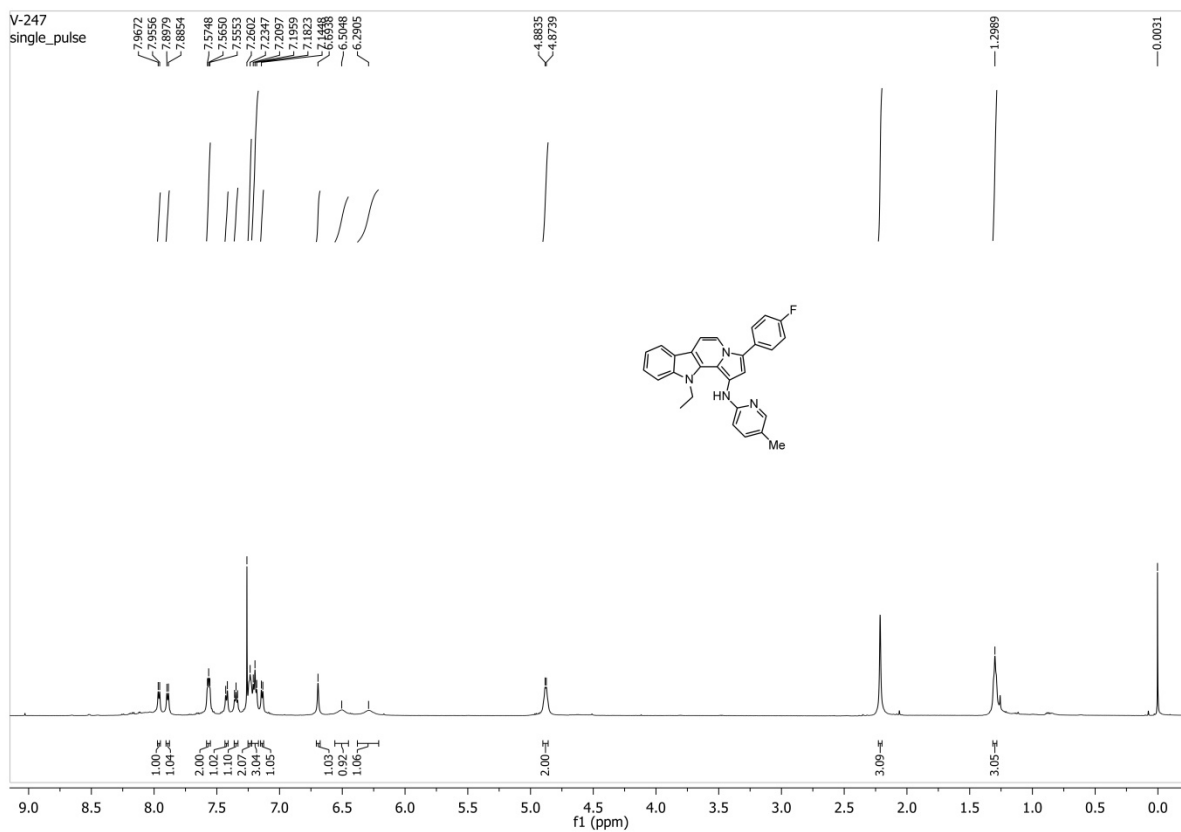

Figure S61.  $^1\text{H-NMR}$  spectrum of **2dJ**.

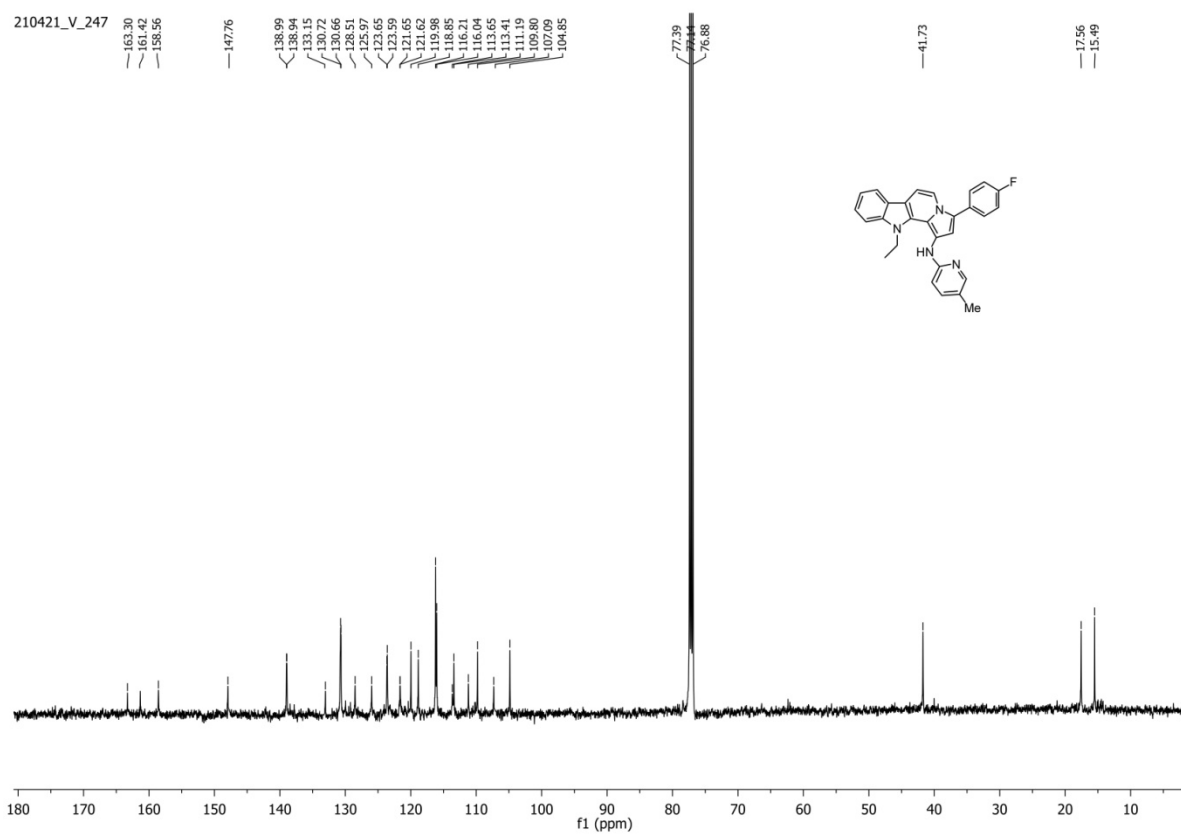

Figure S62.  $^{13}\text{C-NMR}$  spectrum of **2dJ**.



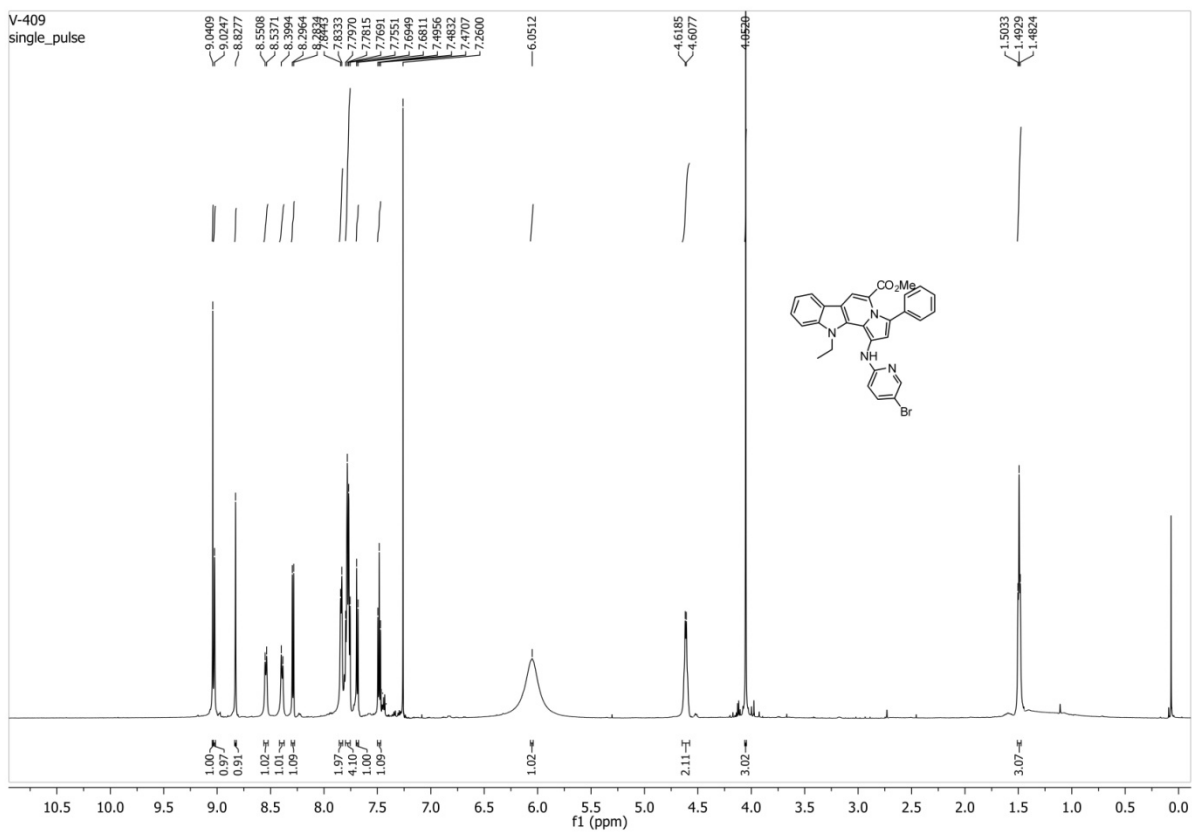

Figure S63.  $^1\text{H-NMR}$  spectrum of **4aE**.

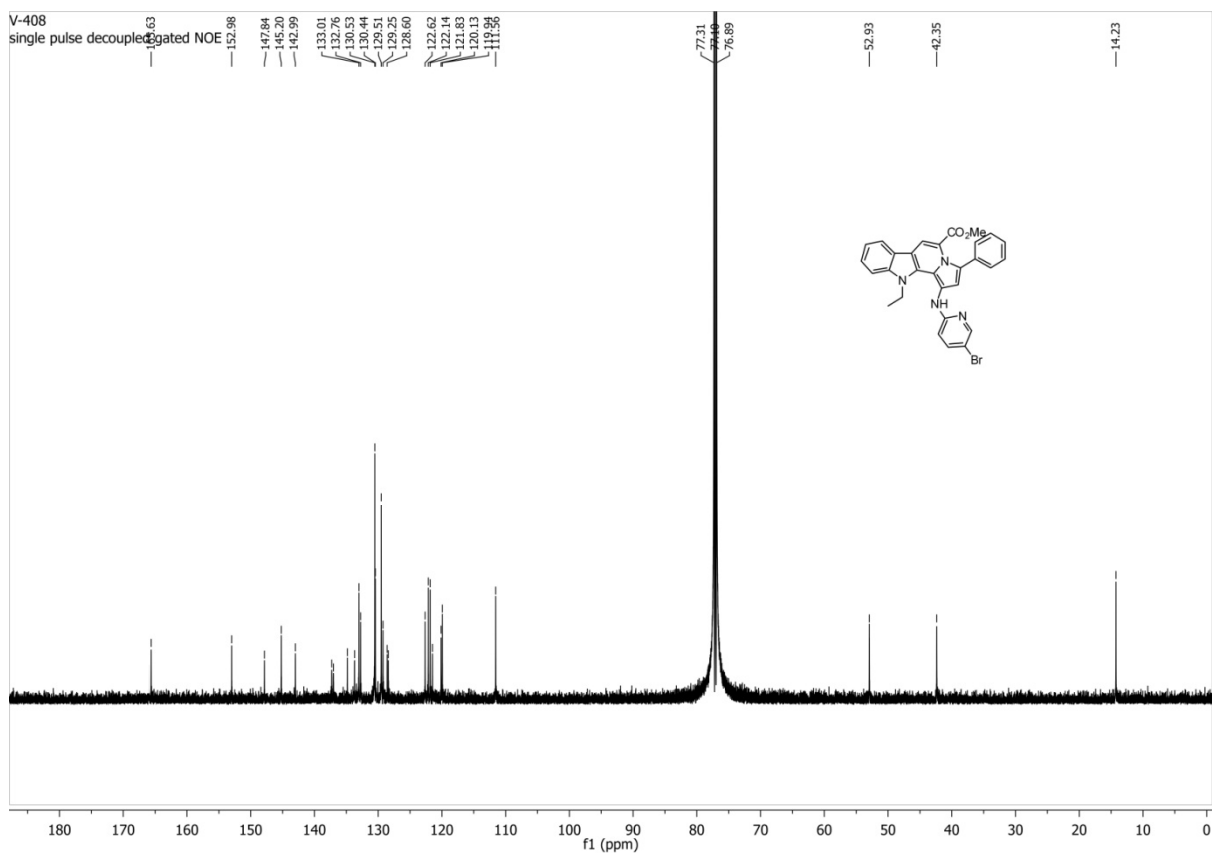

Figure S64.  $^{13}\text{C-NMR}$  spectrum of **4aE**.

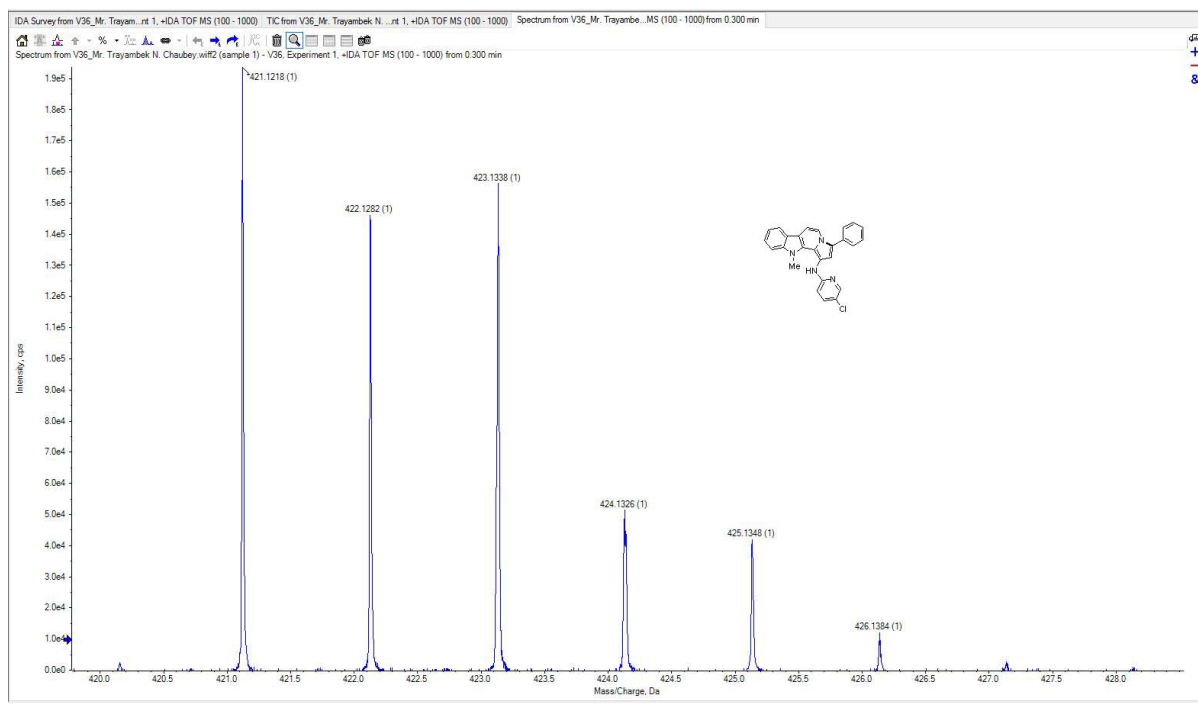

**Figure S65.** HRMS spectrum of **1aC**.

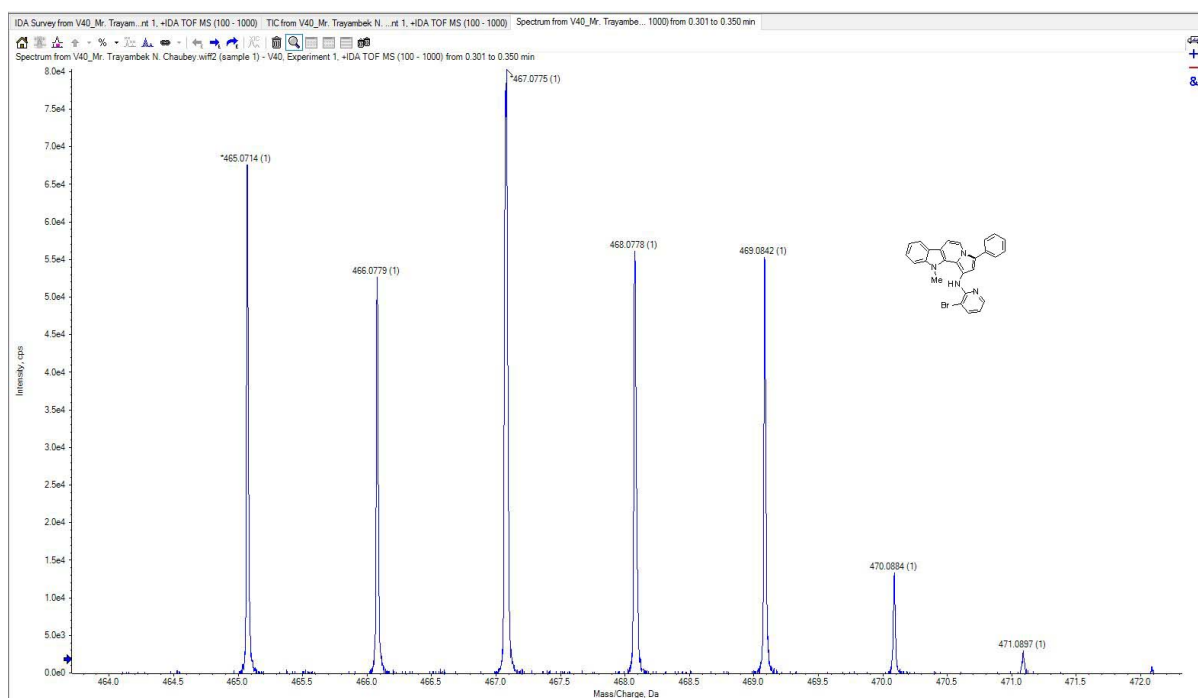

**Figure S66.** HRMS spectrum of **1aD**.

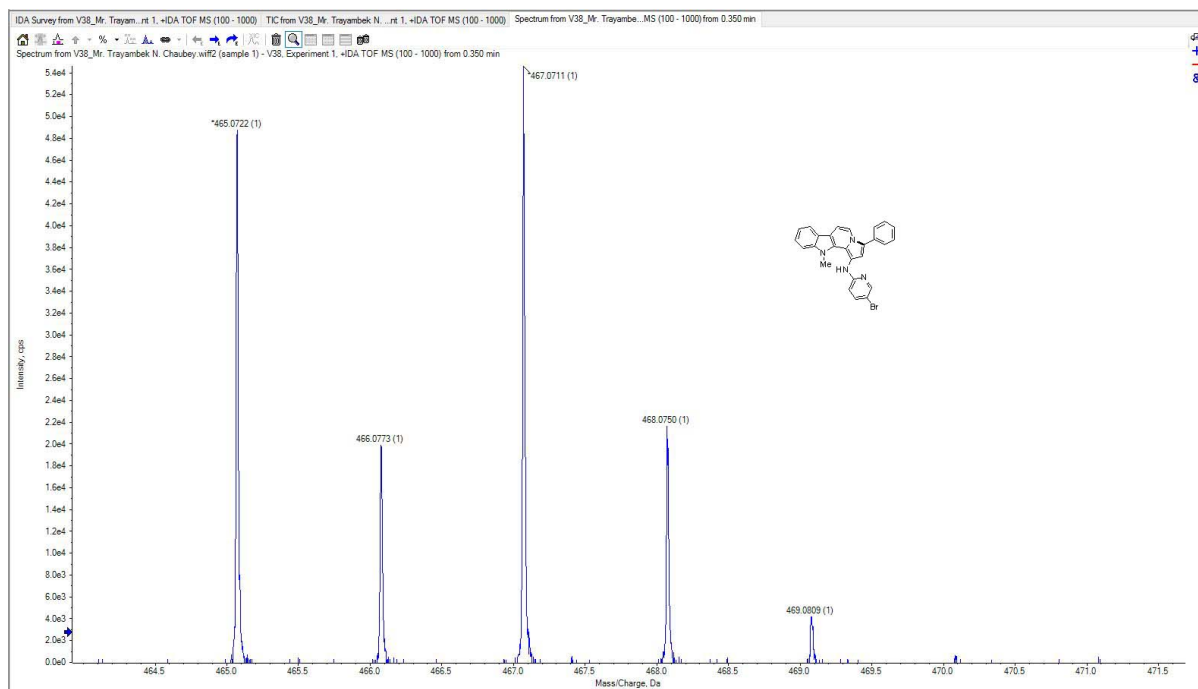

**Figure S67.** HRMS spectrum of **1aE**.

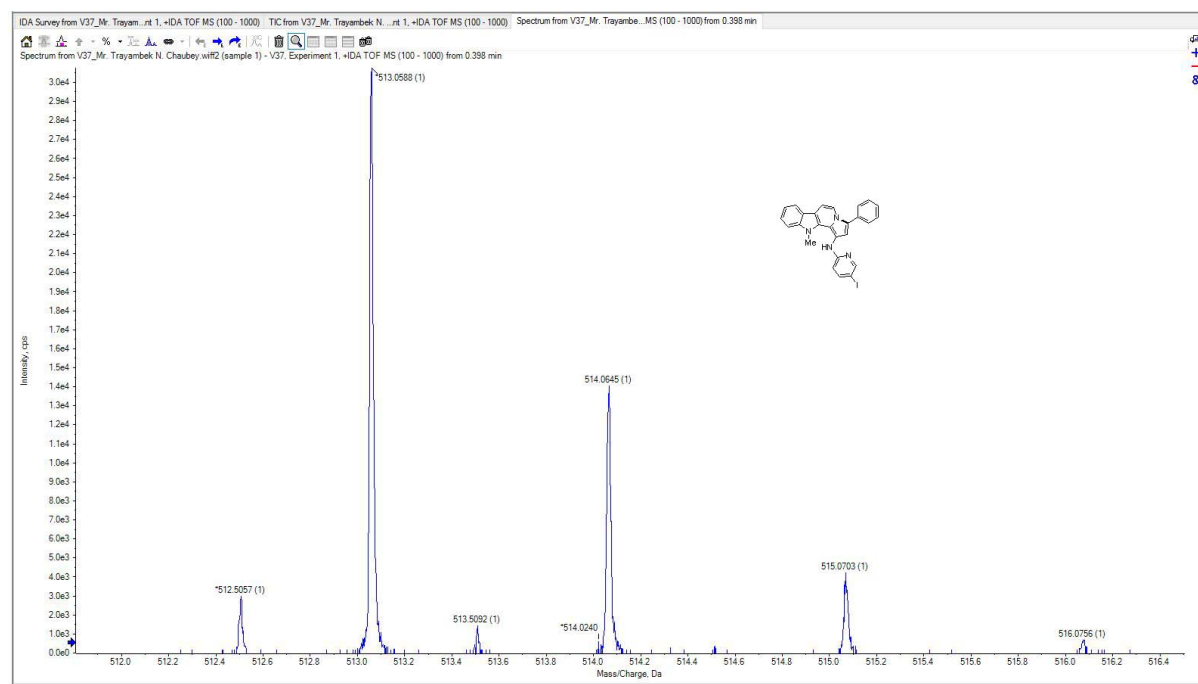

**Figure S68.** HRMS spectrum of **1aF**.

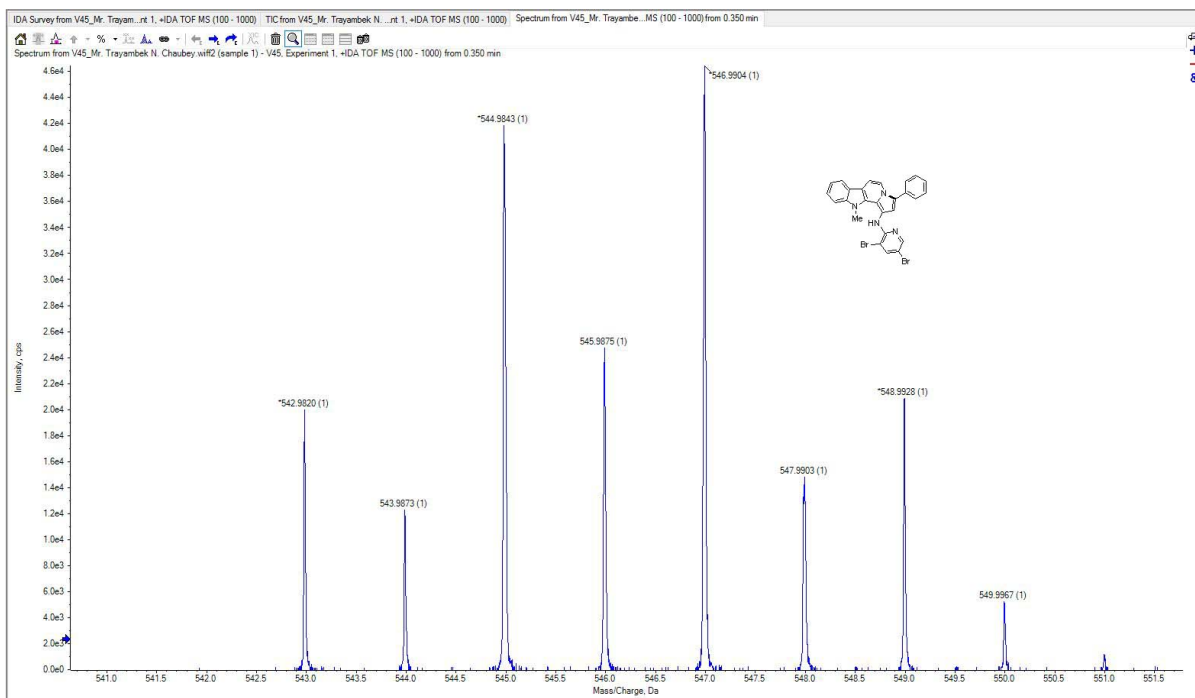

**Figure S69.** HRMS spectrum of **1aH**.

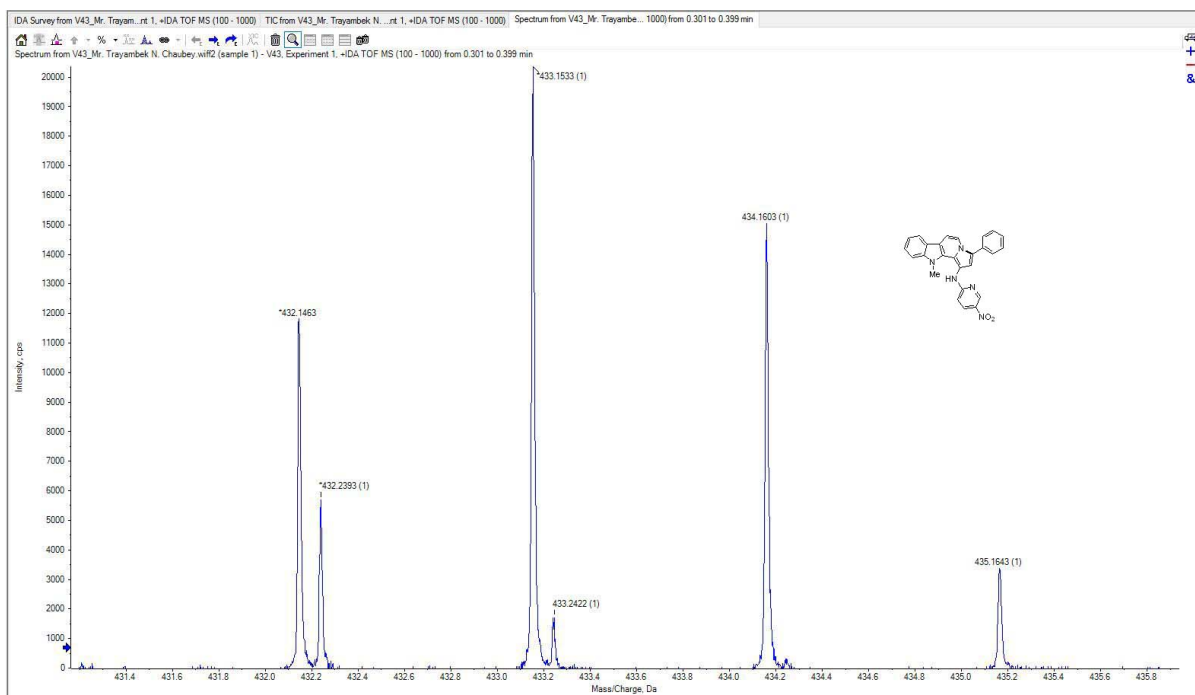

**Figure S70.** HRMS spectrum of **1aI**.

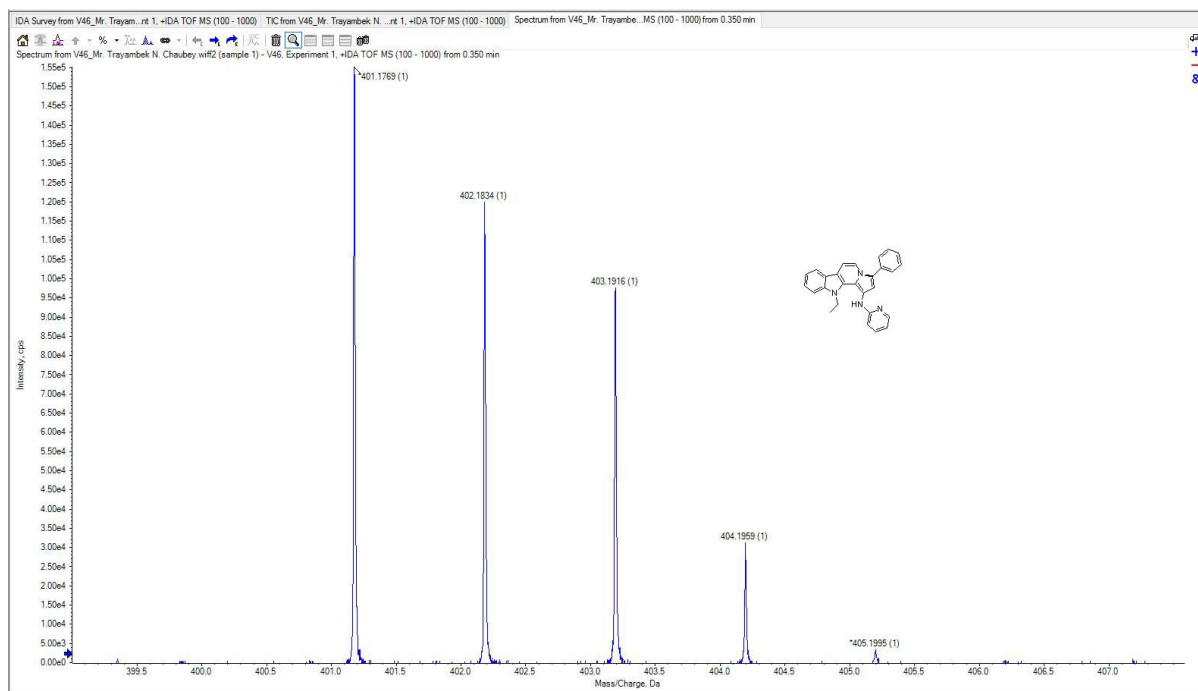

Figure S71. HRMS spectrum of 2aA.

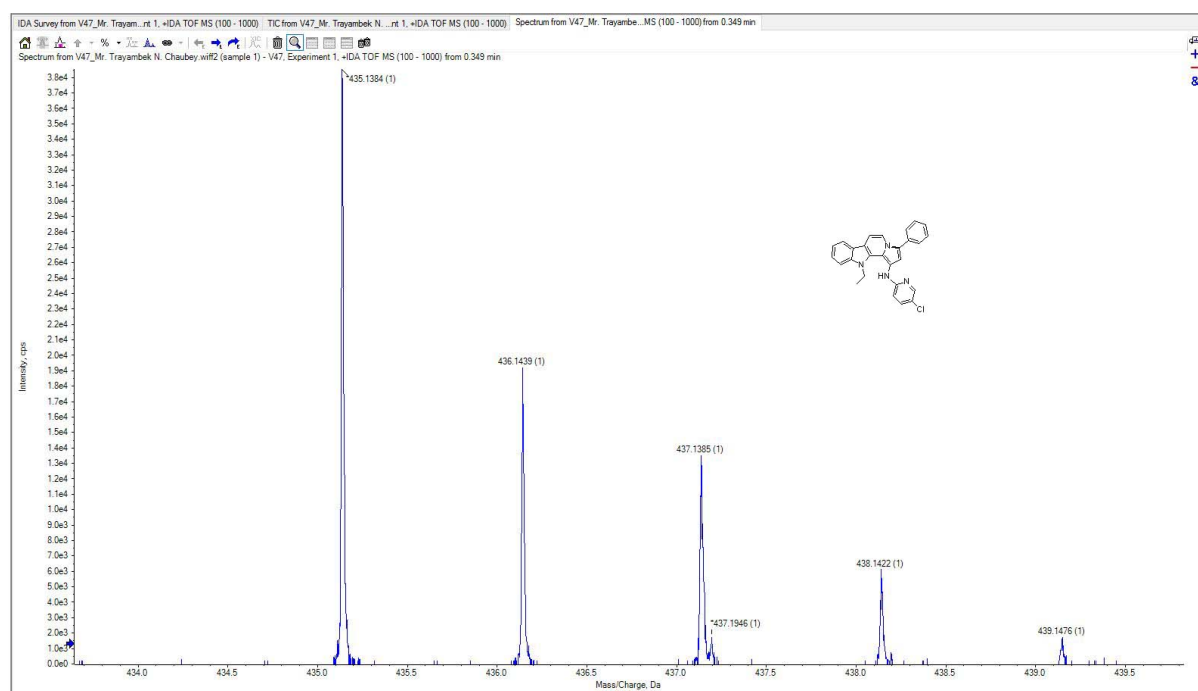

Figure S72. HRMS spectrum of 2aC.

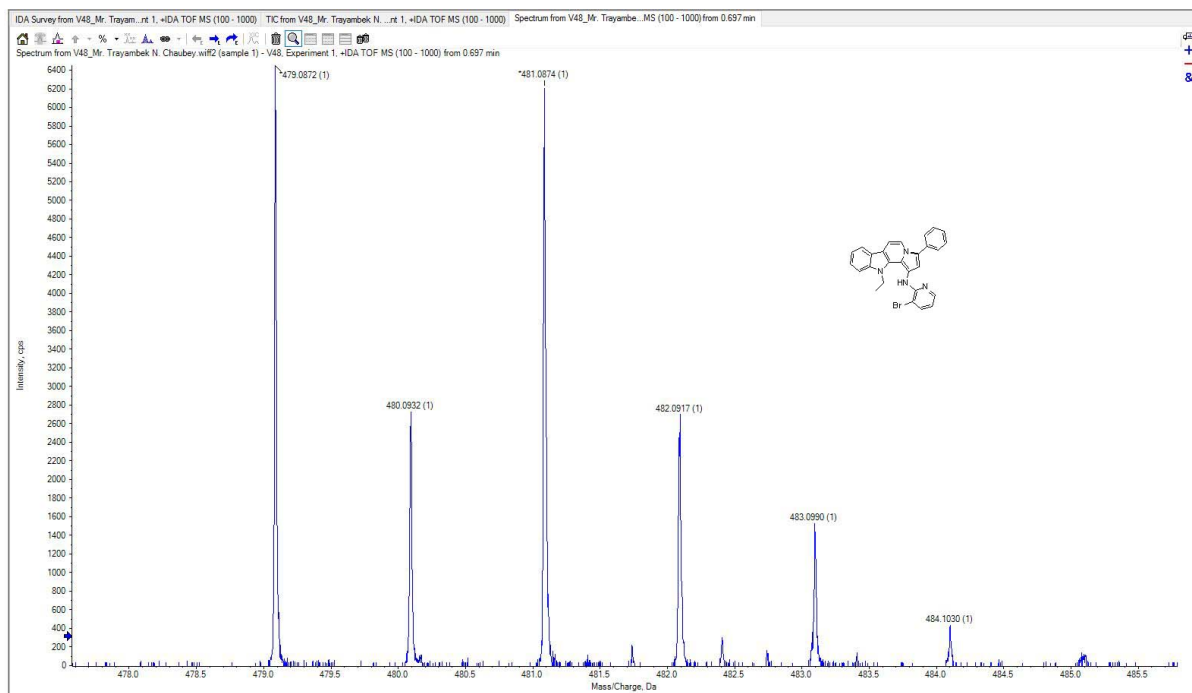

**Figure S73.** HRMS spectrum of **2aD**.

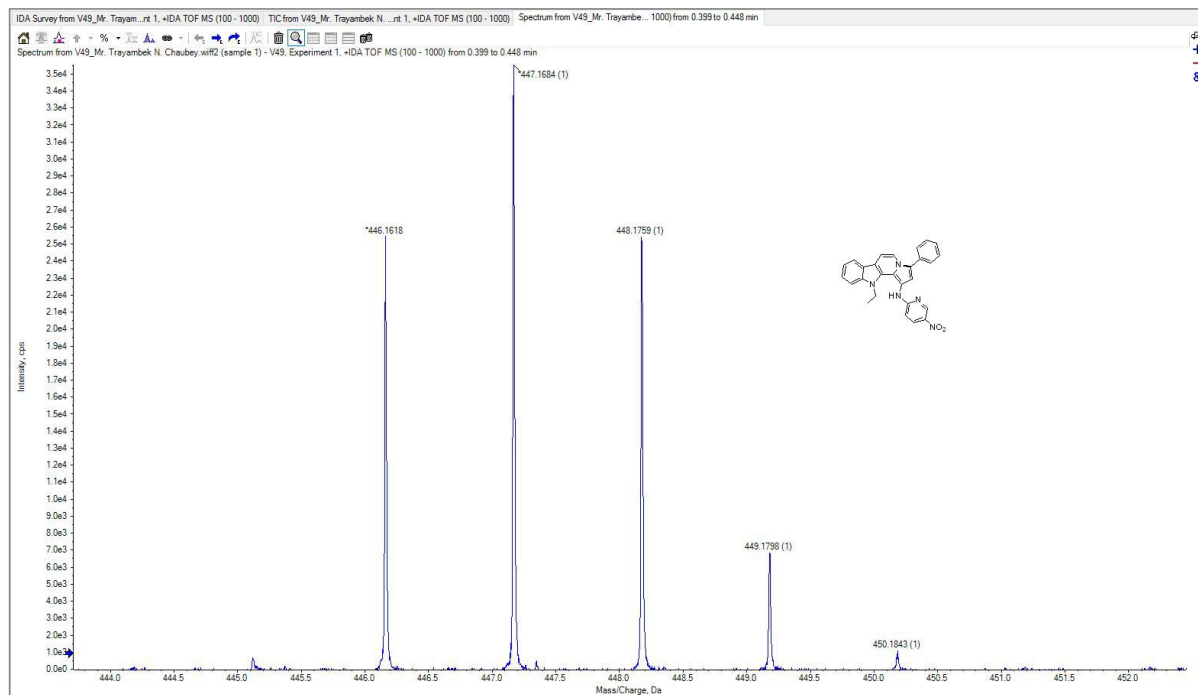

**Figure S74.** HRMS spectrum of **2aI**.

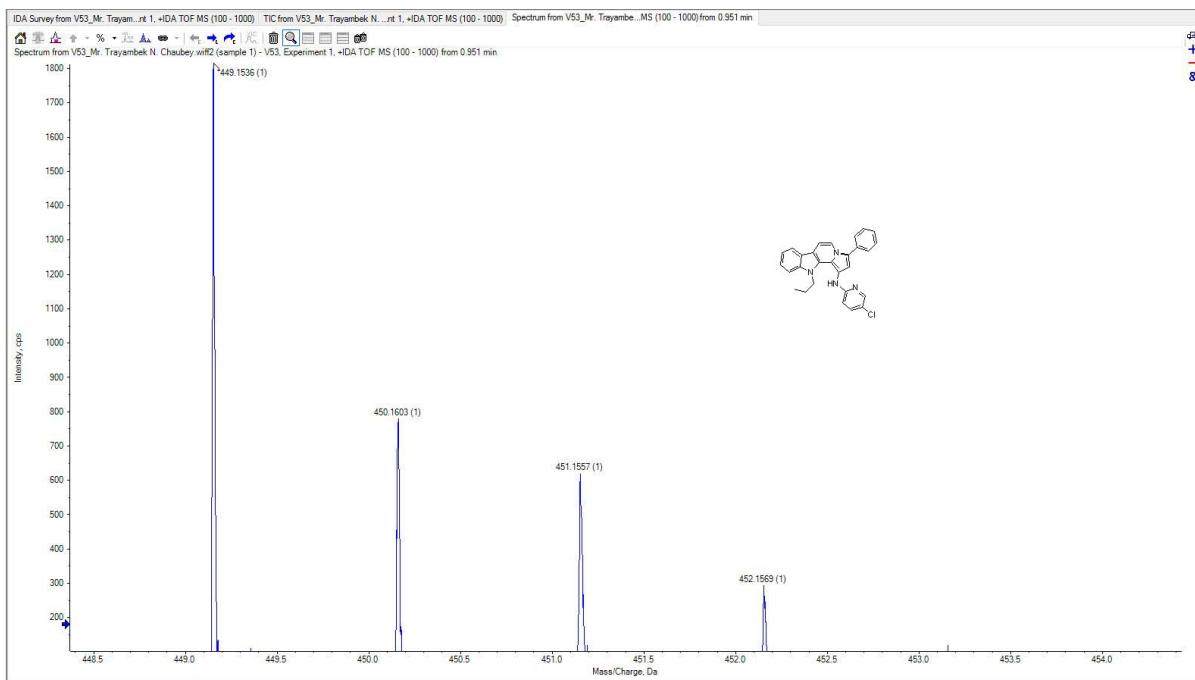

**Figure S75.** HRMS spectrum of **3aC**.

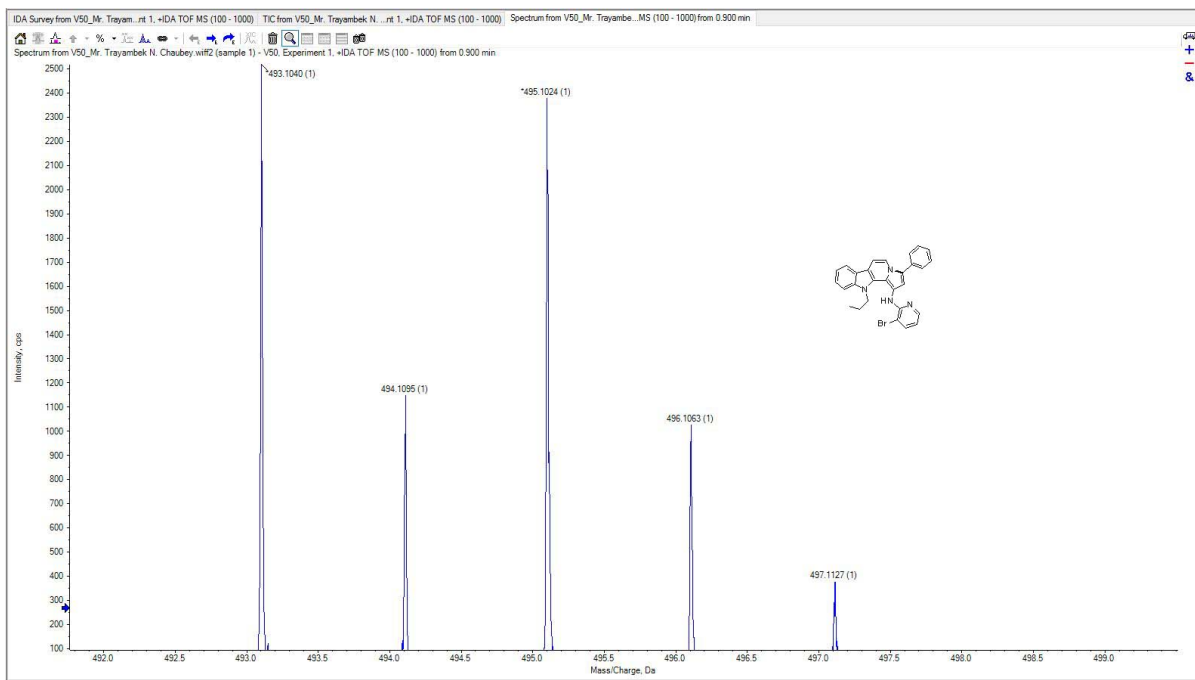

**Figure S76.** HRMS spectrum of **3aD**.

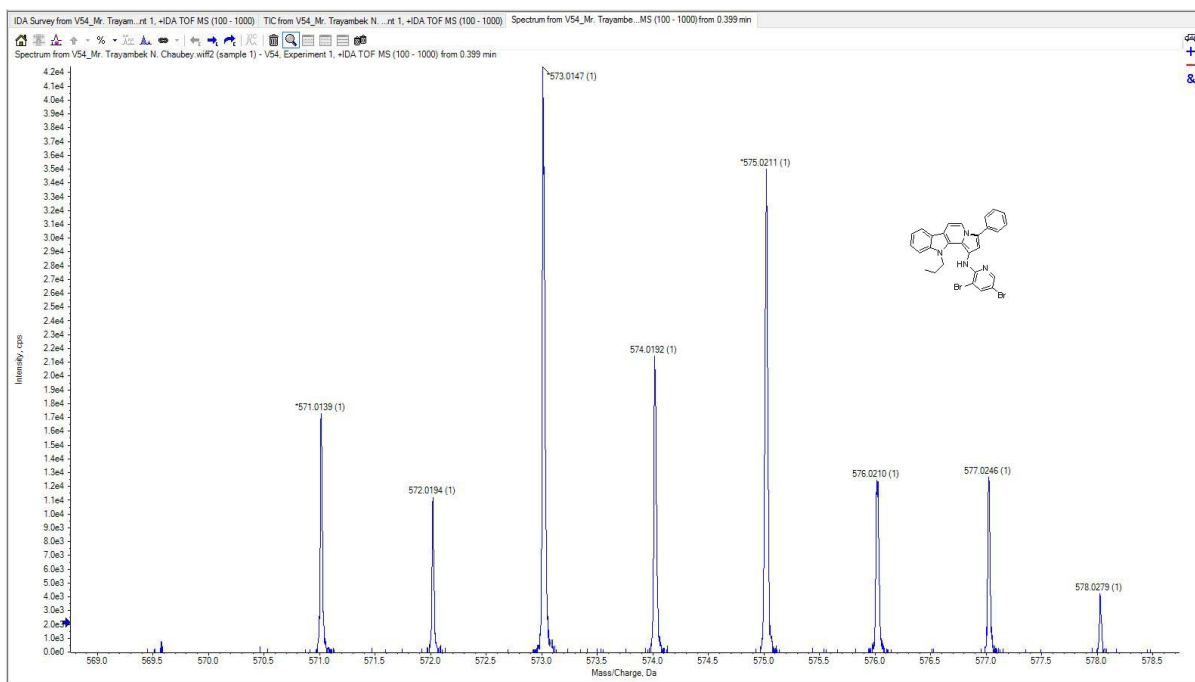

**Figure S77.** HRMS spectrum of **3aH**.

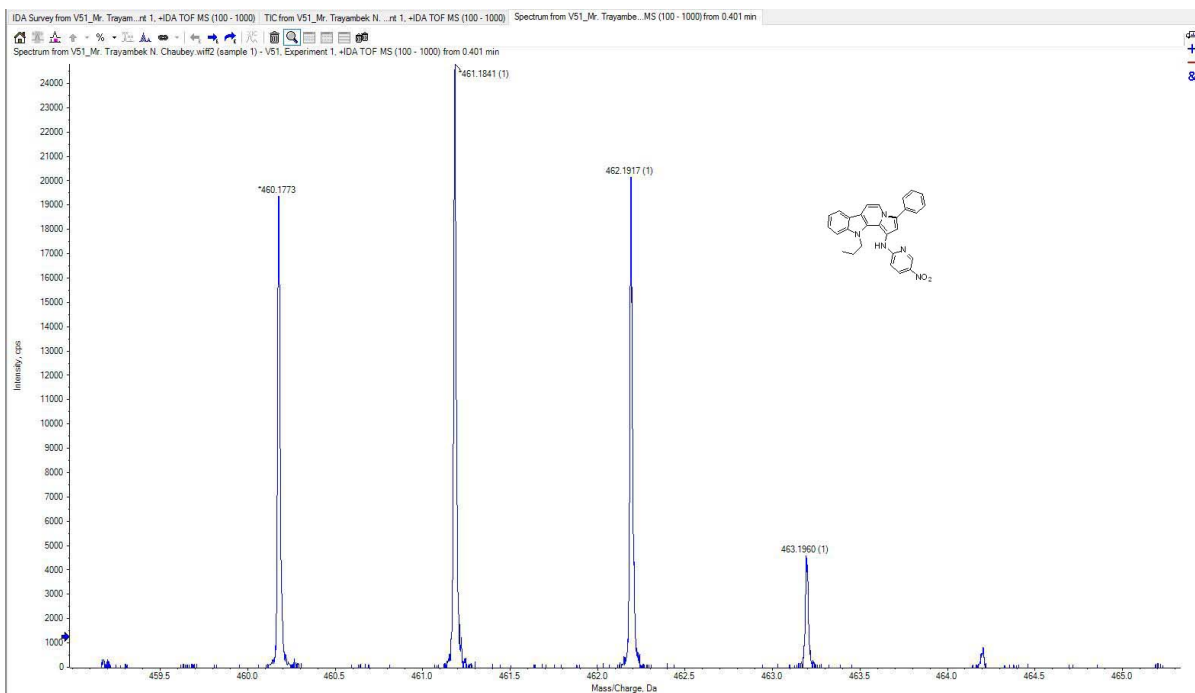

**Figure S78.** HRMS spectrum of **3aI**.



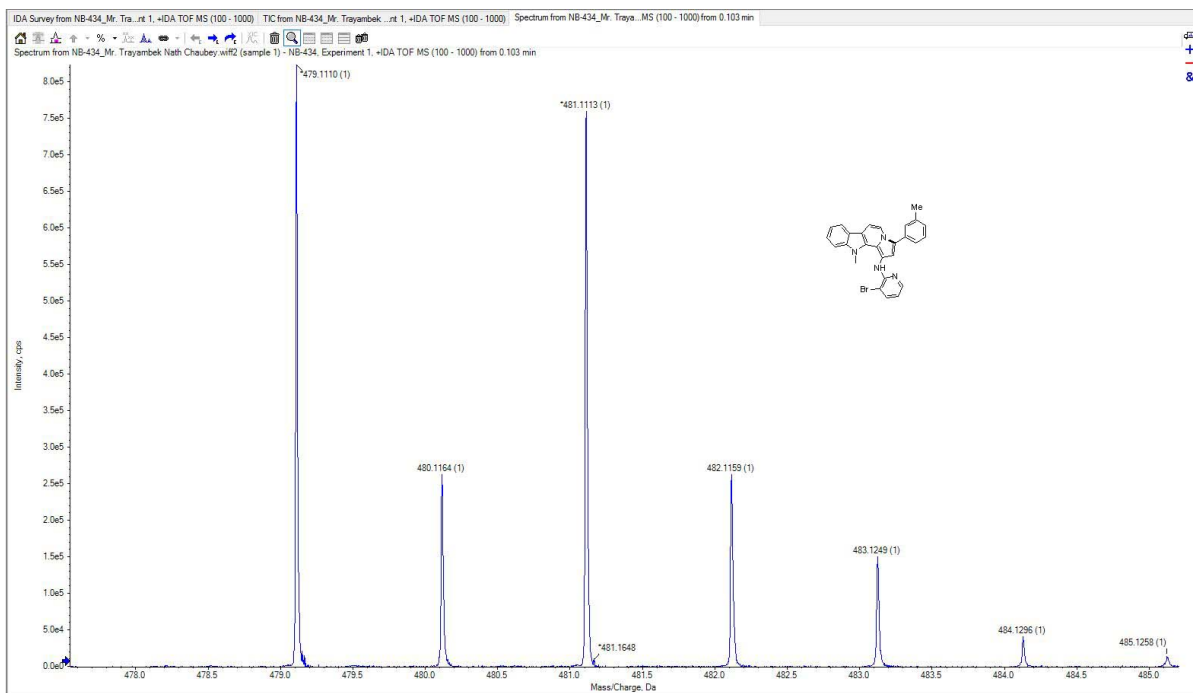

Figure S79. HRMS spectrum of **1bD**.

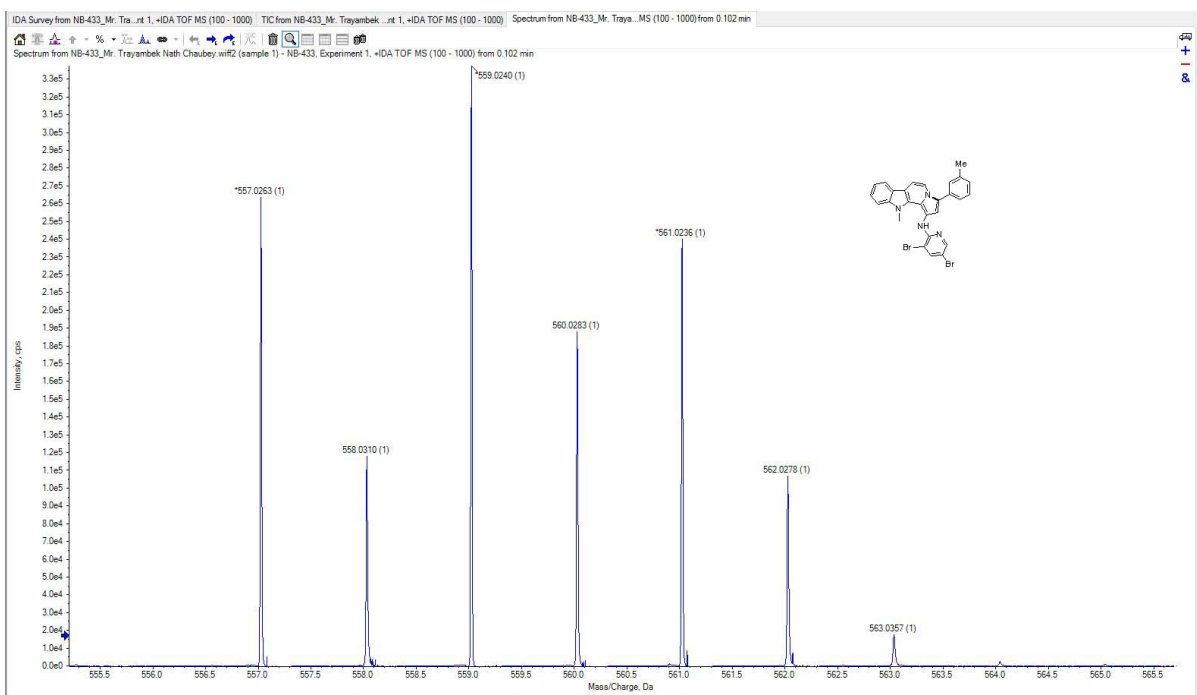

Figure S80. HRMS spectrum of **1bH**.

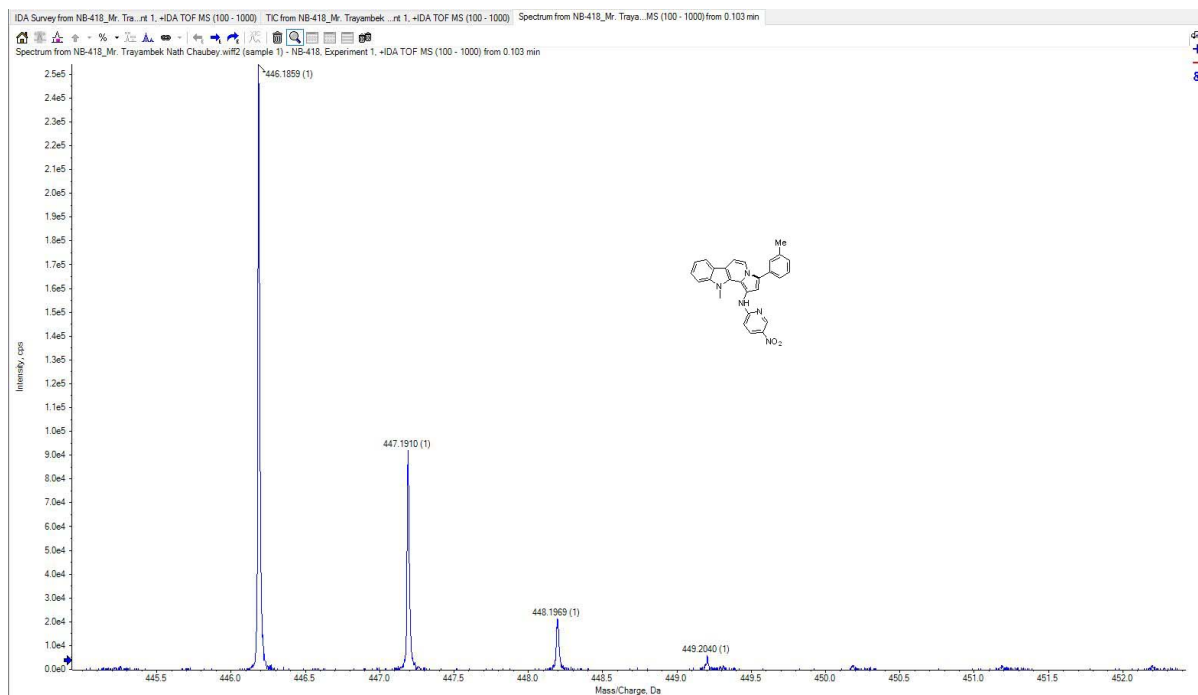

Figure S81. HRMS spectrum of **1b**.

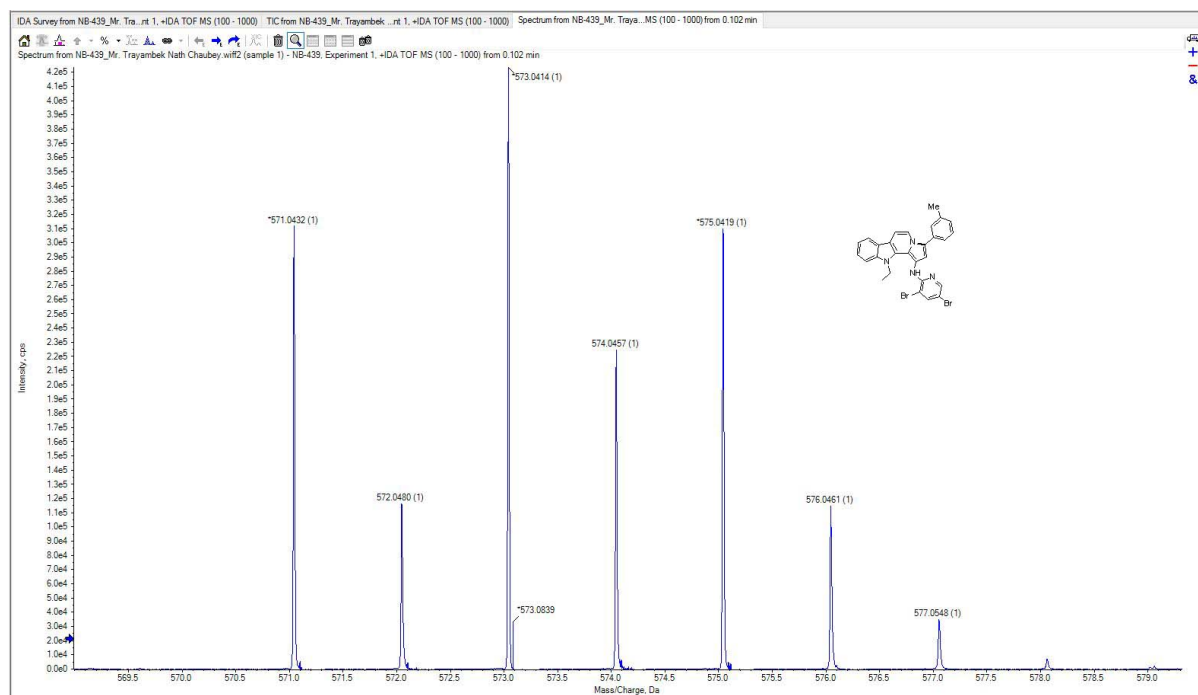

Figure S82. HRMS spectrum of **2bH**.

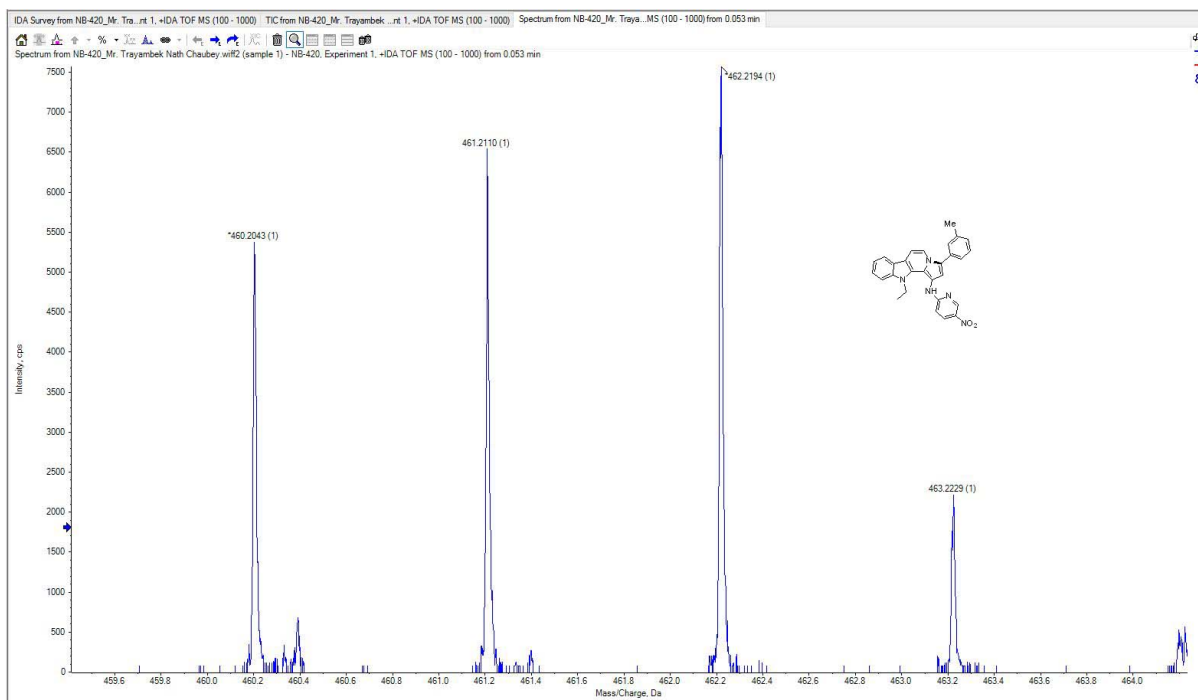

**Figure S83.** HRMS spectrum of **2bI**.

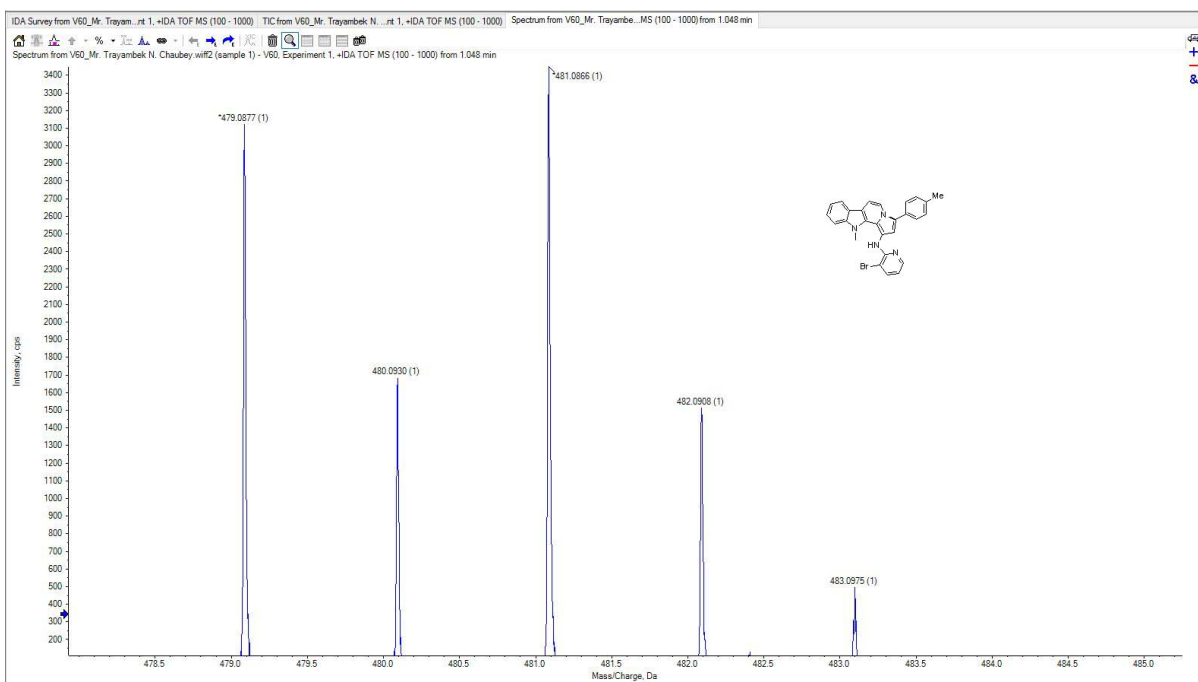

**Figure S84.** HRMS spectrum of **1cD**.

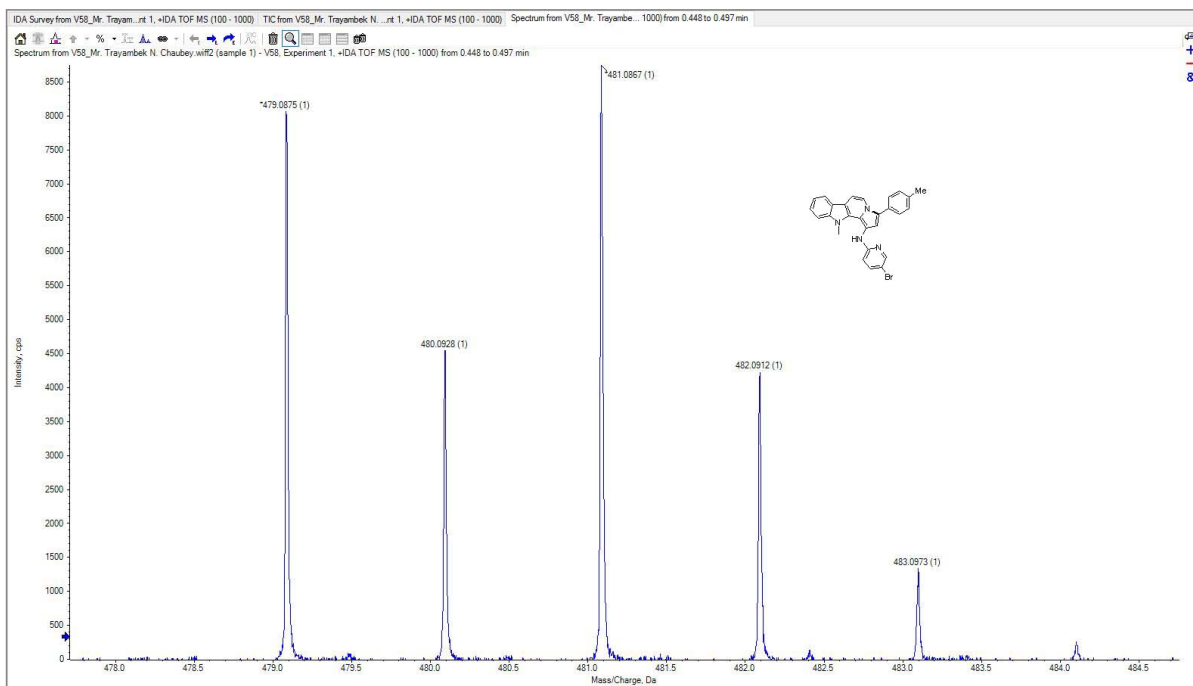

Figure S85. HRMS spectrum of 1cE.

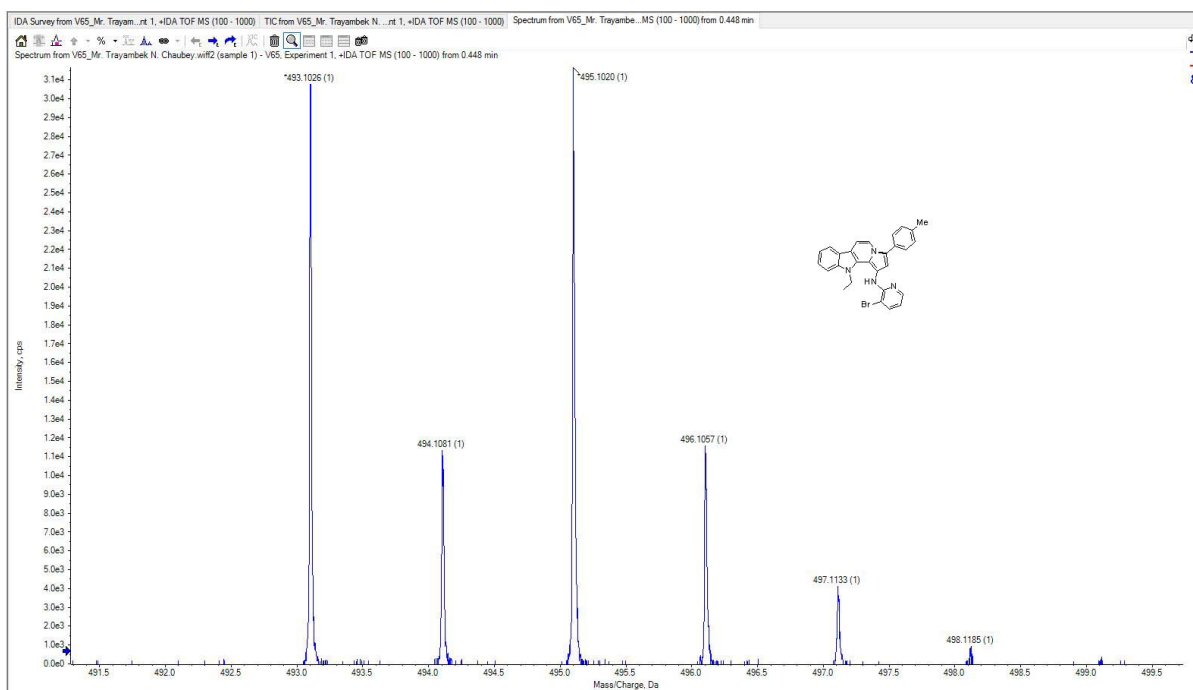

Figure S86. HRMS spectrum of 2cD.

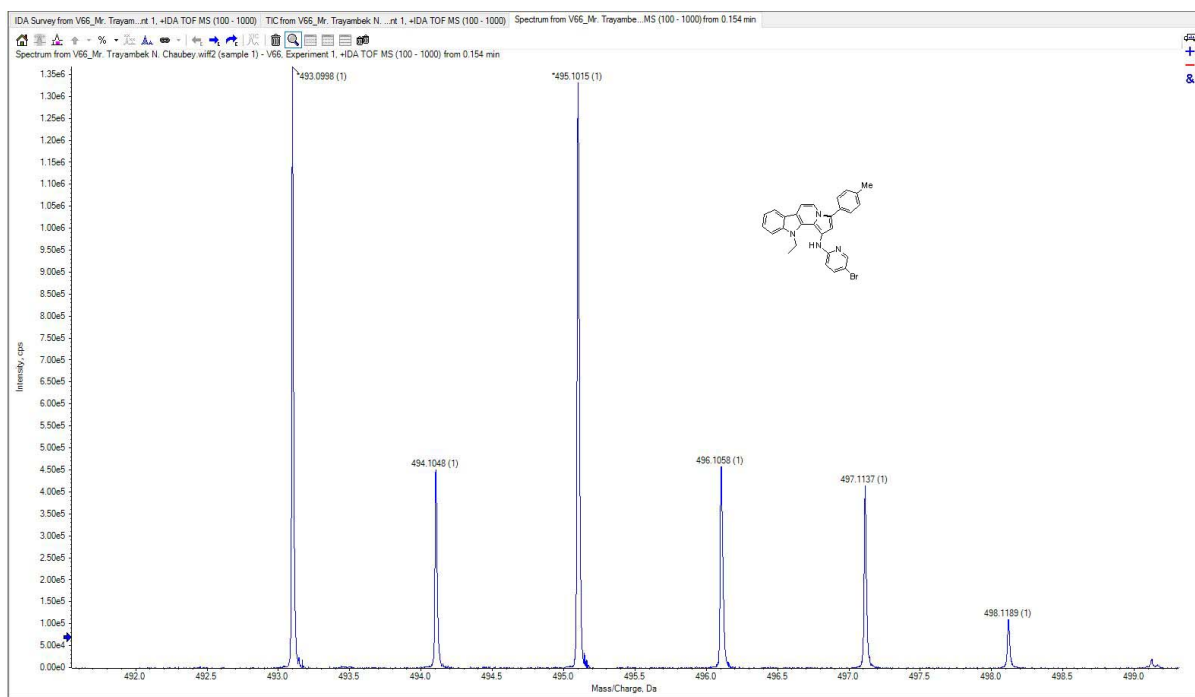

**Figure S87.** HRMS spectrum of **2cE**.

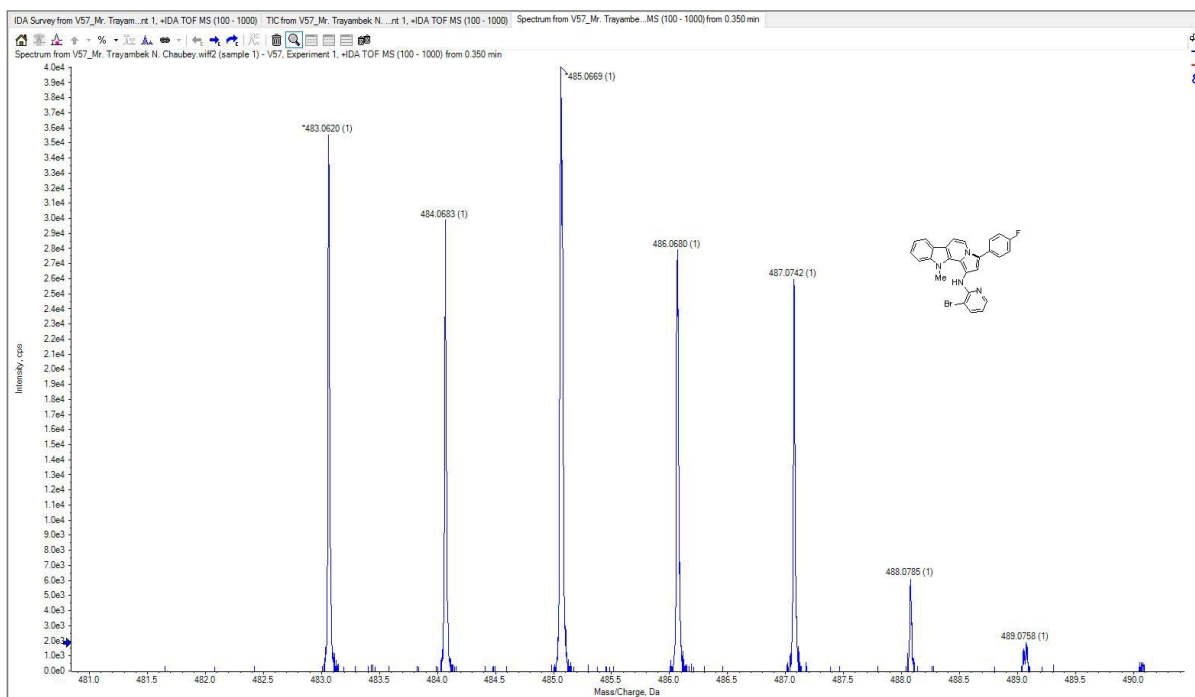

**Figure S88.** HRMS spectrum of **1dD**.

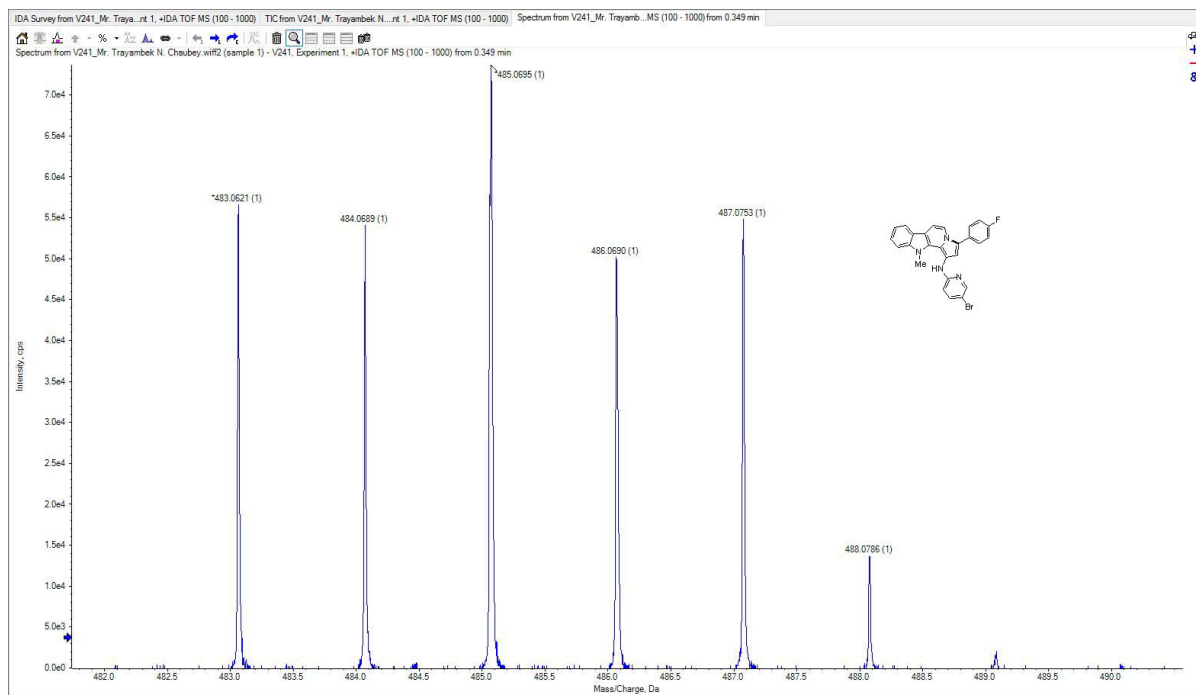

**Figure S89.** HRMS spectrum of **1dE**.
